# Supplementary material for: C–H activation in bimetallic rhodium complexes to afford N-heterocyclic carbene pincer complexes
Source: Royal Society of Chemistry journal article supplement (doi:10.1039/d2dt03984b), 2023-01-01
Supplement: d2dt03984b3.pdf [file d2dt03984b3.pdf]

## ELECTRONIC SUPPORTING INFORMATION

### Electronic Supporting Information for: C–H Activation in Bimetallic Rhodium Complexes to Afford N-Heterocyclic Carbene Pincer Complexes.

Received 00th January 20xx,  
Accepted 00th January 20xx

Anthony F. Hill\*<sup>a</sup> and Lachlan J. Watson<sup>a</sup>

DOI: 10.1039/x0xx00000x

#### Experimental

##### General Considerations

Unless otherwise stated, experimental work was carried out at room temperature under a dry and oxygen-free nitrogen atmosphere using standard Schlenk techniques with dried and degassed solvents.

NMR spectra were obtained on a Bruker Avance 400 (<sup>1</sup>H at 400.1 MHz, <sup>13</sup>C at 100.6 MHz, <sup>19</sup>F at 376.5 MHz, <sup>31</sup>P at 162 MHz), a Bruker Avance 600 (<sup>1</sup>H at 600.0 MHz, <sup>13</sup>C at 150.9 MHz), a Bruker Avance 700 (<sup>1</sup>H at 700.0 MHz, <sup>13</sup>C at 176.1 MHz, <sup>31</sup>P at 283 MHz) or a Bruker Avance 800 (<sup>1</sup>H at 800.1 MHz, <sup>13</sup>C at 201.2 MHz) spectrometers at the temperatures indicated. Chemical shifts ( $\delta$ ) are reported in ppm with coupling constants given in Hz and are referenced to the solvent peak, or external references (85% H<sub>3</sub>PO<sub>4</sub> in H<sub>2</sub>O for <sup>31</sup>P). The multiplicities of NMR resonances are denoted by the abbreviations s (singlet), d (doublet), t (triplet), m (multiplet), br (broad) and combinations thereof for more highly coupled systems. In some cases, distinct peaks were observed in the <sup>1</sup>H and <sup>13</sup>C{<sup>1</sup>H} NMR spectra, but to the level of accuracy that is reportable (i.e. 2 decimal places for <sup>1</sup>H NMR, 1 decimal place for <sup>13</sup>C NMR) they are reported as having the same chemical shift. The abbreviation 'naphth' is used to refer to the naphthalene backbone of the dihydroperimidine based ligand, while 'i' (*ipso*), 'o' (*ortho*), 'm' (*meta*), and 'p' (*para*) refer to positions on the phenyl rings of PPh<sub>2</sub> groups. Extreme insolubility in many samples resulted in low quality NMR acquisitions, and as a result some resonances may not be unequivocally assigned.

Infrared spectra were obtained using a PerkinElmer Spectrum One FT-IR spectrometer. The strengths of IR absorptions are denoted by the abbreviations vs (very strong), s (strong), m (medium), w (weak), sh (shoulder) and br (broad).

Elemental microanalytical data were provided by Macquarie University. High-resolution electrospray ionisation mass spectrometry (ESI-MS) was performed by the ANU Research School of Chemistry mass spectrometry service with acetonitrile or methanol as the matrix.

Data for X-ray crystallography were collected with an Agilent Xcalibur CCD diffractometer or an Agilent SuperNova CCD diffractometer using Mo-K $\alpha$  radiation ( $\lambda = 0.71073$  Å) or Cu-K $\alpha$  radiation ( $\lambda = 1.54184$  Å) and the CrysAlis PRO software.<sup>1</sup> The structures were solved by intrinsic phasing and refined by full-matrix least-squares on  $F^2$  using the SHELXS or SHELXT and SHELXL programs.<sup>2</sup> Hydrogen atoms were located geometrically and refined using a riding model. Diagrams were produced using the CCDC visualisation program Mercury.<sup>3</sup> Structural data for **2a** were collected at the Australian Synchrotron using the MX2 beamline using silicon double crystal monochromated synchrotron radiation at 100 K. Raw frame data were collected using Blulce<sup>4</sup> and data reduction, interframe scaling, unit cell refinement and absorption corrections were processed using XDS.<sup>5</sup>

The synthesis of the pro-ligands 1,8-bis(R-phosphinomethyl)-2,3-dihydroperimidine (di-R-H<sub>2</sub>Pm, R = phenyl, cyclohexyl) and the rhodium complexes [RhCl(RPm)] have been reported previously.<sup>6</sup> The reagents [RhCl(CO)(PPh<sub>3</sub>)<sub>2</sub>],<sup>7</sup> [RhCl(CS)(PPh<sub>3</sub>)<sub>2</sub>],<sup>8</sup> [RhH(CO)(PPh<sub>3</sub>)<sub>3</sub>],<sup>9</sup> [Rh(CO)(PPh<sub>3</sub>)<sub>2</sub>]<sub>2</sub>,<sup>10,11</sup> potassium graphite (KC<sub>8</sub>),<sup>12</sup> and triphenylcyclopropenium hexafluorophosphate<sup>13,14</sup> were prepared according to literature procedures. The remaining reagents were purchased from commercial sources.

#### Computational Details

Computational studies were performed by using the SPARTAN20<sup>®</sup> suite of programs.<sup>15</sup> Geometry optimisation (gas phase) for diatomics and metal complexes was performed at the DFT level of theory using the exchange functionals  $\omega$ B97X-D of Head-Gordon.<sup>16,17</sup> The Los Alamos effective core potential type basis set (LANL2DZ) of Hay and Wadt<sup>18-20</sup> was used for I, Mo and W while Pople 6-31G\* basis sets<sup>21</sup> were used for all other atoms. Frequency calculations were performed for all compounds to

<sup>a</sup> Research School of Chemistry, Australian National University, Canberra, Australian Capital Territory, ACT 2601, Australia.

\* Corresponding author. E-mail: a.hill@anu.edu.au

CCDC 2222022-2222025.2222038, 2222051 and 22225520 contain the supplementary crystallographic data for this paper, and are available free of charge from The Cambridge Crystallographic Data Centre.

confirm that each optimized structure was a local minimum and also to identify vibrational modes of interest. Cartesian atomic coordinates are provided below.

## Synthetic Procedures

**Synthesis of [RhCl(CO)( $\mu$ -PhH<sub>2</sub>Pm)]<sub>2</sub> (2a).** A solution of [RhCl(CO)(PPh<sub>3</sub>)<sub>2</sub>] (644 mg, 0.932 mmol) and PhH<sub>2</sub>Pm (528 mg, 0.932 mmol) was heated to 50 °C in THF (20 mL) for 1.5 hours resulting in an off-white suspension. The solvent was removed under reduced pressure, and the sample suspended in CH<sub>2</sub>Cl<sub>2</sub> (15 mL) and treated with ethanol (20 mL) before selectively removing the CH<sub>2</sub>Cl<sub>2</sub> under reduced pressure to afford an off-white precipitate. The suspension was filtered and the solid washed with ethanol (20 mL), petroleum spirits (60–80 °C, 40 mL) and diethyl ether (30 mL) before drying *in vacuo*. Yield: 560 mg (0.382 mmol, 82%). IR (CH<sub>2</sub>Cl<sub>2</sub>, cm<sup>-1</sup>): 1980  $\nu_{\text{CO}}$ , 1590  $\nu_{\text{C=C}}$ . IR (ATR, cm<sup>-1</sup>): 1978  $\nu_{\text{CO}}$ , 1591  $\nu_{\text{C=C}}$ . <sup>1</sup>H NMR (700 MHz, CDCl<sub>3</sub>, 298 K):  $\delta_{\text{H}}$  = 7.80 (s.br, 8 H, PPh<sub>2</sub>), 7.31, 7.21 (2 x s.br, overlap with CHCl<sub>3</sub> peak, 12 H, PPh<sub>2</sub>), 6.85 (d, 2 H, <sup>3</sup>J<sub>HH</sub> = 8.1 Hz, naphCH), 6.74 (dd, 2 H, <sup>3</sup>J<sub>HH</sub> = 7.81 Hz, naphCH), 5.98 (d, 2 H, <sup>3</sup>J<sub>HH</sub> = 7.6 Hz, naphCH), 5.33 (m, 4 H, NCH<sub>2</sub>P), 4.79 (s.br, 2 H, NCH<sub>2</sub>N). The compound was insufficiently soluble in any organic solvent to unequivocally identify any peaks in the <sup>13</sup>C{<sup>1</sup>H} or 2D <sup>1</sup>H–<sup>13</sup>C HSQC or HMBC NMR spectra. <sup>31</sup>P{<sup>1</sup>H} NMR (283 MHz, CDCl<sub>3</sub>, 298 K):  $\delta_{\text{P}}$  = 18.5 (d.br, <sup>1</sup>J<sub>RhP</sub> = 124 Hz). MS (ESI, +ve ion, *m/z*): Found: 1429.1781. Calcd. for C<sub>76</sub>H<sub>64</sub><sup>35</sup>ClN<sub>4</sub>P<sub>4</sub>Rh<sub>2</sub>O<sub>2</sub> [M–Cl]<sup>+</sup>: 1429.1779. Anal. Found: C 62.37 H 4.44 N 3.81 %. Calcd. for C<sub>76</sub>H<sub>64</sub>Cl<sub>2</sub>N<sub>4</sub>P<sub>4</sub>Rh<sub>2</sub>O<sub>2</sub>: C 62.27 H 4.40 N 3.82 %. Crystals suitable for structural determination were grown by slow evaporation of a saturated chloroform solution at 25 °C and measured at the Australian Synchrotron on the MX<sub>2</sub> beamline. Low data completion ratio is due to the limitations of the instrument available at the Australian Synchrotron operating under rotation data collection with a fixed detector and affects some high angle data. *Crystal Data for C<sub>76</sub>H<sub>64</sub>Cl<sub>2</sub>N<sub>4</sub>O<sub>2</sub>P<sub>4</sub>Rh<sub>2</sub>* (*M<sub>w</sub>* = 1465.91 gmol<sup>-1</sup>): triclinic, space group *P*-1 (no. 2), *a* = 11.403(2), *b* = 12.569(3), *c* = 12.798(3) Å,  $\alpha$  = 108.38(3),  $\beta$  = 106.46(3),  $\gamma$  = 93.84(3)°, *V* = 1644.5(7) Å<sup>3</sup>, *Z* = 1, *T* = 100(2) K,  $\mu$ (Synchrotron) = 0.732 mm<sup>-1</sup>, *D*<sub>calc</sub> = 1.480 Mgm<sup>-3</sup>, 30342 reflections measured (3.466° ≤ 2 $\theta$  ≤ 64.204°), 8517 unique (*R*<sub>int</sub> = 0.0563, *R*<sub>sigma</sub> = 0.0613) which were used in all calculations. The final *R*<sub>1</sub> was 0.0521 (*I* > 2 $\sigma$ (*I*)) and *wR*<sub>2</sub> was 0.1575 (all data) for 406 refined parameters without restraints. CCDC 2222552.

**Synthesis of [RhCl(CO)( $\mu$ -CyH<sub>2</sub>Pm)]<sub>2</sub> (2b).** A suspension of [RhCl(CO)(PPh<sub>3</sub>)<sub>2</sub>] (100 mg, 0.145 mmol) and CyH<sub>2</sub>Pm (86 mg, 0.145 mmol) was stirred in THF (10 mL) for 2 hours before removing the solvent under reduced pressure. The sample was partially dissolved in CH<sub>2</sub>Cl<sub>2</sub> (10 mL) before adding ethanol (20 mL), then removing the CH<sub>2</sub>Cl<sub>2</sub> selectively under reduced pressure to afford an off-white precipitate. The suspension was filtered and the solid washed with petroleum spirits (60–80 °C, 10 mL) and diethyl ether (10 mL) before drying *in vacuo*. Yield: 83 mg (0.055 mmol, 76%). IR (CH<sub>2</sub>Cl<sub>2</sub>, cm<sup>-1</sup>): 1955  $\nu_{\text{CO}}$ , 1608  $\nu_{\text{C=C}}$ . IR (ATR, cm<sup>-1</sup>): 1954  $\nu_{\text{CO}}$ , 1591  $\nu_{\text{C=C}}$ . <sup>1</sup>H NMR (700 MHz, C<sub>6</sub>D<sub>12</sub>, 298 K):  $\delta_{\text{H}}$  = 7.17 (dd, 2 H, <sup>3</sup>J<sub>HH</sub> = 7.8 Hz, naphCH), 7.04 (d, 2 H,

<sup>3</sup>J<sub>HH</sub> = 8.1 Hz, naphCH), 6.63 (s.br, 2 H, naphCH), 5.06 (3 x s.br, 6 H, NCH<sub>2</sub>P and NCH<sub>2</sub>N). The compound was insufficiently soluble in any organic solvent to usefully identify any resonances in the <sup>13</sup>C{<sup>1</sup>H} or 2D <sup>1</sup>H–<sup>13</sup>C{<sup>1</sup>H} HSQC or HMBC NMR spectra. <sup>31</sup>P{<sup>1</sup>H} NMR (283 MHz, C<sub>6</sub>D<sub>12</sub>, 298 K):  $\delta_{\text{P}}$  = 42.76, 34.52 (2 x s.br). MS (ESI, +ve ion, *m/z*): Found: 1477.5537. Calcd. for C<sub>76</sub>H<sub>112</sub><sup>35</sup>ClN<sub>4</sub>O<sub>2</sub>P<sub>4</sub>Rh<sub>2</sub> [M–Cl]<sup>+</sup>: 1477.5534. Anal. Found: C 60.30 H 7.34 N 3.72 %. Calcd. for C<sub>76</sub>H<sub>112</sub>Cl<sub>2</sub>N<sub>4</sub>O<sub>2</sub>P<sub>4</sub>Rh<sub>2</sub>: C 60.28 H 7.45 N 3.70 %. Insolubility of the complex precluded recrystallisation for X-ray diffraction studies.

**Synthesis of [RhCl(CS)( $\mu$ -PhH<sub>2</sub>Pm)]<sub>2</sub> (3a).** An orange solution of [RhCl(CS)(PPh<sub>3</sub>)<sub>2</sub>] (135 mg, 0.191 mmol) and PhH<sub>2</sub>Pm (108 mg, 0.191 mmol) in THF (20 mL) was stirred for 1.5 hours. The solvent was removed under reduced pressure, and the sample dissolved in the minimal CH<sub>2</sub>Cl<sub>2</sub> (*ca.* 10 mL). Addition of *n*-hexane (30 mL) and selective removal of CH<sub>2</sub>Cl<sub>2</sub> under reduced pressure afforded a light orange precipitate. The suspension was filtered and the solid washed with *n*-hexane (30 mL), ethanol (5 mL) and diethyl ether (15 mL) before drying *in vacuo*. Yield: 108 mg (0.0739 mmol, 78%). IR (CH<sub>2</sub>Cl<sub>2</sub>, cm<sup>-1</sup>): 1592  $\nu_{\text{C=C}}$ , 1312  $\nu_{\text{CS}}$ . IR (ATR, cm<sup>-1</sup>): 1591  $\nu_{\text{C=C}}$ , 1311  $\nu_{\text{CS}}$ . <sup>1</sup>H NMR (700 MHz, CDCl<sub>3</sub>, 298 K):  $\delta_{\text{H}}$  = 7.86 (s.br, 8 H, PPh<sub>2</sub>), 7.29, 7.21 (2 x s.br, 12 H, PPh<sub>2</sub>), 6.85 (d, 2 H, <sup>3</sup>J<sub>HH</sub> = 7.9 Hz, naphCH), 6.76 (dd, 2 H, <sup>3</sup>J<sub>HH</sub> = 7.6 Hz, naphCH), 6.05 (d, 2 H, <sup>3</sup>J<sub>HH</sub> = 7.4 Hz, naphCH), 5.40 (s.br, 4 H, NCH<sub>2</sub>P), 4.83 (s.br, 2 H, NCH<sub>2</sub>N). The compound was insufficiently soluble in any organic solvent to identify the CS carbon resonance by <sup>13</sup>C{<sup>1</sup>H} or <sup>1</sup>H–<sup>13</sup>C HMBC spectroscopy. <sup>13</sup>C{<sup>1</sup>H} NMR (100 MHz, CDCl<sub>3</sub>, 298 K):  $\delta_{\text{C}}$  = 142.1, 135.1 (naphC), 135.0 (naphC or PPh<sub>2</sub>), 132.3 (d, *J*<sub>PC</sub> = 10 Hz, PPh<sub>2</sub>), 132.1, 130.8, 130.7, 130.6, 130.5 (naphC or PPh<sub>2</sub>), 128.6 (d, *J*<sub>PC</sub> = 12 Hz, PPh<sub>2</sub>), 128.2 (PPh<sub>2</sub>), 116.9, 115.3, 104.7 (naphCH), 67.3 (NCH<sub>2</sub>N), 50.5 (m, NCH<sub>2</sub>P). <sup>31</sup>P{<sup>1</sup>H} NMR (163 MHz, CDCl<sub>3</sub>, 298 K):  $\delta_{\text{P}}$  = 19.6 (d.br, <sup>1</sup>J<sub>RhP</sub> = 137 Hz). MS (ESI, +ve ion, *m/z*): Found: 713.0816. Calcd. for C<sub>38</sub>H<sub>32</sub>N<sub>2</sub>P<sub>2</sub>RhS [M – 2Cl]<sup>2+</sup>: 713.0817. Anal. Found: C 60.91 H 4.28 N 3.77 S 3.81 %. Calcd. for C<sub>76</sub>H<sub>64</sub>Cl<sub>2</sub>N<sub>4</sub>P<sub>4</sub>Rh<sub>2</sub>S<sub>2</sub>: C 60.93 H 4.28 N 3.74 S 4.28 %. Crystals suitable for structural determination were grown from liquid diffusion of ethanol into a saturated CDCl<sub>3</sub> solution at 5 °C. The crystals suffer from modulated disorder from a rotating chloroform solvate influencing the ligand backbone. The modulation could not be successfully modelled, but a twofold disorder model is adequate to extract some structural information. Low data completion ratio is due to the limitations of the instrument available at the Australian Synchrotron operating under rotation data collection with a fixed detector and affects some high angle data. *Crystal Data for C<sub>39</sub>H<sub>33</sub>Cl<sub>4</sub>N<sub>2</sub>P<sub>2</sub>RhS* (*M<sub>w</sub>* = 868.38 gmol<sup>-1</sup>): triclinic, space group *P*-1 (no. 2), *a* = 12.1459(6), *b* = 12.7759(8), *c* = 13.1675(7) Å,  $\alpha$  = 70.396(5),  $\beta$  = 77.844(4),  $\gamma$  = 84.928(4)°, *V* = 1881.32(19) Å<sup>3</sup>, *Z* = 2, *T* = 150.0(1) K,  $\mu$ (Cu K $\alpha$ ) = 7.852 mm<sup>-1</sup>, *D*<sub>calc</sub> = 1.533 Mgm<sup>-3</sup>, 13600 reflections measured (7.346° ≤ 2 $\theta$  ≤ 147.404°), 7420 unique (*R*<sub>int</sub> = 0.0342, *R*<sub>sigma</sub> = 0.0466) which were used in all calculations. The final *R*<sub>1</sub> was 0.0505 (*I* > 2 $\sigma$ (*I*)) and *wR*<sub>2</sub> was 0.1413 (all data) for 739 refined parameters with 625 restraints. CCDC 2222051.

**Synthesis of [RhCl(CS)( $\mu$ -CyH<sub>2</sub>Pm)]<sub>2</sub> (3b).** A suspension of [RhCl(CO)(PPh<sub>3</sub>)<sub>2</sub>] (90 mg, 0.127 mmol) and CyH<sub>2</sub>Pm (75 mg,

0.127 mmol) was stirred in THF (10 mL) for an hour before removing the solvent under reduced pressure. The sample was partially dissolved in  $\text{CH}_2\text{Cl}_2$  (15 mL) before adding ethanol (20 mL) and filtering to afford a pale orange solid. The solid was washed with petroleum spirits (60–80 °C, 20 mL) and diethyl ether (10 mL) before drying *in vacuo*. Yield: 68 mg (0.044 mmol, 69%). IR ( $\text{CH}_2\text{Cl}_2$ ,  $\text{cm}^{-1}$ ): 1607  $\nu_{\text{C}=\text{C}}$ ,  $\nu_{\text{CS}}$  obscured by solvent background. IR (ATR,  $\text{cm}^{-1}$ ): 1591  $\nu_{\text{C}=\text{C}}$ , 1283  $\nu_{\text{CS}}$ . The compound was too insoluble in any organic solvent to obtain useful NMR data. This also precluded crystallographic analysis. MS (ESI, +ve ion,  $m/z$ ): Found: 1509.5090. Calcd. for  $\text{C}_{76}\text{H}_{112}^{35}\text{ClN}_4\text{P}_4\text{Rh}_2\text{S}_2$  [M–Cl]<sup>+</sup>: 1509.5077. Anal. Found: C 59.24 H 7.13 N 3.64 S 3.79 %. Calcd. for  $\text{C}_{76}\text{H}_{112}\text{Cl}_2\text{N}_4\text{P}_4\text{Rh}_2\text{S}_2$ : C 59.02 H 7.30 N 3.62 S 4.15 %.

**Syntheses of  $[\text{Rh}_2(\mu\text{-CO})_2(\text{PhH}_2\text{Pm})_2]\cdot\text{Et}_2\text{O}$  (4).** (a) *Method 1;  $\text{KC}_8$  reduction*: A suspension of **2a** (256 mg, 0.175 mmol) and  $\text{KC}_8$  (180 mg, 1.33 mmol) in benzene (10 mL) was stirred for 4–12 hours at room temperature and the reaction progress monitored regularly by  $^1\text{H}$  NMR spectroscopy. Immediately after consumption of the starting material and concomitant formation of a dark red colour, the suspension was filtered through diatomaceous earth, washing with benzene (~10 mL) until the filtrate ran clear. The solvent was condensed to ~4 mL under reduced pressure, and diethyl ether (10 mL) added to afford a red-orange precipitate. The solid was collected by filtration, washing with *n*-hexane (3 x 15 mL) and diethyl ether (2 x 5 mL), before drying *in vacuo*. Yield: 42 mg (0.029 mmol, 17%). (b) *Method 2; ligand substitution*: A solution of  $[\text{Rh}(\text{CO})(\text{PPh}_3)_2]$  in benzene was prepared by bubbling CO through a solution of  $[\text{Rh}(\text{CO})(\text{PPh}_3)_3]$  (250 mg, 0.272 mmol) in benzene (10 mL) for 30 mins. To the orange solution was added  $\text{PhH}_2\text{Pm}$  (154 mg, 0.271 mmol), causing a darker colour and some effervescence. After stirring for 16 hours, the solvent was condensed to ~4 mL under reduced pressure and diethyl ether (4 mL) added to afford a very small amount of off-white precipitate. The red filtrate was collected, and diethyl ether (6 mL) added before leaving the flask to sit for an hour to form large red crystals. The product was collected by filtration and washed with *n*-hexane (3 x 15 mL) and diethyl ether (2 x 5 mL) before drying *in vacuo*. Yield: 121 mg (0.0824 mmol, 61%). IR (THF,  $\text{cm}^{-1}$ ): 1738  $\nu_{\text{CO}}$ , 1593  $\nu_{\text{C}=\text{C}}$ . IR (ATR,  $\text{cm}^{-1}$ ): 1736  $\nu_{\text{CO}}$ , 1591  $\nu_{\text{C}=\text{C}}$ .  $^1\text{H}$  NMR (700 MHz,  $\text{C}_6\text{D}_6$ , 298 K):  $\delta_{\text{H}} = 8.05$  (m, 8 H, *o*-PPh<sub>2</sub>), 7.44, 7.36 (2 x m, 8 H, *o*-PPh<sub>2</sub>), 7.29 (s.br, 2 H, NCH–Rh), 7.32, 7.27 (2 x m, 4 H, naphCH), 7.23–6.78 (series of multiplets, 24 H, *m*-PPh<sub>2</sub> and *p*-PPh<sub>2</sub>), 6.67–6.62 (m, 8 H, naphCH), 4.57, 4.38 (2 x s.br, 2 x 2 H, NCH<sub>2</sub>P), 4.13 (d, 2 H,  $^2J_{\text{HH}} = 12$  Hz, terminal NCHN), 3.88, 3.80 (2 x s.br, 2 x 2 H, NCH<sub>2</sub>P), 3.27 (q, 2 H,  $^3J_{\text{HH}} = 7$  Hz, Et<sub>2</sub>O), 1.12 (t, 3 H,  $^3J_{\text{HH}} = 7$  Hz, Et<sub>2</sub>O). Overlapping peaks prevent accurate integrations and assignments of some  $^1\text{H}$  NMR signals. Some positions were determined using 2-D NMR techniques, while others could not be assigned with confidence.  $^{31}\text{P}\{^1\text{H}\}$  NMR (283 MHz,  $\text{C}_6\text{D}_6$ , 298 K):  $\delta_{\text{P}} = 24.09$  (d,  $^1J_{\text{RhP}} = 186$  Hz), 18.69 (d,  $^1J_{\text{RhP}} = 201$  Hz).  $^{31}\text{P}\{^1\text{H}\}$  NMR (162 MHz,  $\text{C}_6\text{D}_6$ , 298 K):  $\delta_{\text{P}} = 24.07$  (d,  $^1J_{\text{RhP}} = 186$  Hz), 18.77 (d,  $^1J_{\text{RhP}} = 201$  Hz).  $^{13}\text{C}\{^1\text{H}\}$  NMR (176 MHz,  $\text{C}_6\text{D}_6$ , 298 K):  $\delta_{\text{C}} = 238.5$  (m, Rh<sub>2</sub>CO), 146.2, 145.4 (2 x s.br, naphC), 137.70 (t.br,  $^1J_{\text{PC}} = 34$  Hz, *i*-PPh<sub>2</sub>), 136.9 (d,  $^1J_{\text{PC}} = 31$  Hz, *i*-PPh<sub>2</sub>), 136.5 (naphC), 133.9 (br m, *o*-PPh<sub>2</sub>), 132.7 (d, *o*-

PPh<sub>2</sub>), 129.6–127.0 (series of peaks unassigned by 2D experiments, naphC, *m*-PPh<sub>2</sub>, *p*-PPh<sub>2</sub>), 120.8 (brs, naphCH), 119.9 (naphC), 119.4 (s.br, naphCH), 110.7, 107.5 (2 x br s, naphCH), 65.9 (s, Et<sub>2</sub>O), 64.0 (br m, N<sub>2</sub>CH<sub>2</sub>), 52.4 (d.br,  $^1J_{\text{PC}} = 23$  Hz, NCH<sub>2</sub>P), 50.02 (d.br,  $^1J_{\text{PC}} = 26$  Hz, NCH<sub>2</sub>P), 15.60 (Et<sub>2</sub>O). The sensitivity of this compound precluded mass spectrometric analysis. Anal. Found: C 65.63 H 4.71 N 4.12 %. Calcd. for  $\text{C}_{76}\text{H}_{62}\text{N}_4\text{O}_2\text{P}_4\text{Rh}_2$ : C 65.43 H 4.62 N 4.02 %. Crystals suitable for structural determination were grown from liquid diffusion of diethyl ether into a saturated benzene solution of the sample at room temperature. *Crystal Data for  $\text{C}_{84}\text{H}_{84}\text{N}_4\text{O}_4\text{P}_4\text{Rh}_2$*  ( $M_w = 1541.23$   $\text{g mol}^{-1}$ ): monoclinic, space group I2/a (no. 15),  $a = 26.9934(4)$ ,  $b = 12.76730(10)$ ,  $c = 23.3601(4)$  Å,  $\beta = 115.376(2)^\circ$ ,  $V = 7273.9(2)$  Å<sup>3</sup>,  $Z = 4$ ,  $T = 150.0(1)$  K,  $\mu(\text{Cu K}\alpha) = 4.929$   $\text{mm}^{-1}$ ,  $D_{\text{calc}} = 1.407$   $\text{Mg m}^{-3}$ , 21222 reflections measured ( $7.816^\circ \leq 2\theta \leq 147.844^\circ$ ), 7280 unique ( $R_{\text{int}} = 0.0207$ ,  $R_{\text{sigma}} = 0.0209$ ) which were used in all calculations. The final  $R_1$  was 0.0292 ( $I > 2\sigma(I)$ ) and  $wR_2$  was 0.0770 (all data) for 444 refined parameters without restraints. CCDC 2222038.

**Syntheses of  $[\text{Rh}(\text{CO})(\text{PhPm})\text{X}(\text{X} = \text{BF}_4, \text{PF}_6)]$  (5).** (a) *Method 1, synthesis of  $[\text{Rh}(\text{CO})(\text{PhPm})]\text{BF}_4$* : A solution of **1a** (250 mg, 0.356 mmol) and  $\text{AgBF}_4$  (83 mg, 0.427 mmol) in acetonitrile (15 mL) was stirred for 1 hour in the absence of light before bubbling CO through the solution for 1.5 hours. The solution was stirred for a further hour, then the solvent removed under reduced pressure. The product was extracted through a small diatomaceous earth plug (3 x 5 cm) with the minimal  $\text{CH}_2\text{Cl}_2$  (~20 mL), and the solvent removed under reduced pressure. The product was then extracted through an identical diatomaceous earth plug using the minimal ethanol (20 mL) to which *n*-hexane (100 mL) was added to afford a bright yellow solid. Following filtration, the solid was washed with toluene (2 x 15 mL), *n*-hexane (2 x 20 mL) and Et<sub>2</sub>O (2 x 20 mL) before drying *in vacuo*. Yield: 189 mg (242 mmol, 68 %). IR ( $\text{CH}_2\text{Cl}_2$ ,  $\text{cm}^{-1}$ ) 2029  $\nu_{\text{CO}}$ , 1586  $\nu_{\text{C}=\text{C}}$ . IR (ATR,  $\text{cm}^{-1}$ ) 2025  $\nu_{\text{CO}}$ , 1583  $\nu_{\text{C}=\text{C}}$ .  $^1\text{H}$  NMR (800 MHz,  $(\text{CD}_3)_2\text{CO}$ , 298 K):  $\delta_{\text{H}} = 7.96$  (m, 8 H, *o*-PPh<sub>2</sub>), 7.65 (m, 4 H, *p*-PPh<sub>2</sub>), 7.62 (m, 8 H, *m*-PPh<sub>2</sub>), 7.56 (d, 2 H,  $^3J_{\text{HH}} = 8$  Hz, naphCH), 7.46 (t, 2 H,  $^3J_{\text{HH}} = 8$  Hz, naphCH), 7.29 (d, 2 H,  $^3J_{\text{HH}} = 8$  Hz, naphCH), 5.48 (t<sup>v</sup>,  $^2J_{\text{PH}} = 3$  Hz, NCH<sub>2</sub>P).  $^{31}\text{P}\{^1\text{H}\}$  NMR (162 MHz,  $\text{CD}_2\text{Cl}_2$ , 298 K):  $\delta_{\text{P}} = 36.90$  (d,  $^1J_{\text{RhP}} = 132$  Hz).  $^{19}\text{F}$  NMR (376 MHz,  $\text{CD}_2\text{Cl}_2$ , 298 K):  $\delta_{\text{F}} = -152.3$  (s).  $^{13}\text{C}\{^1\text{H}\}$  NMR (201 MHz,  $(\text{CD}_3)_2\text{CO}$ , 298 K):  $\delta_{\text{C}} = 209.2$  (dt,  $^1J_{\text{Rhc}} = 47$ ,  $^2J_{\text{PC}} = 10$  Hz, NCN, assigned on the basis of coupling to the NCH<sub>2</sub>P protons in the HMBC experiment), 195.5 (dt,  $^1J_{\text{Rhc}} = 58$ ,  $^2J_{\text{PC}} = 13$  Hz, CO), 135.0 (naphC), 134.7 (naphC), 133.9 (vt,  $^2J_{\text{PC}} = 7$  Hz, *o*-PPh<sub>2</sub>), 132.7 (*p*-PPh<sub>2</sub>), 131.40 (naphC), 131.0 (vt,  $^1J_{\text{PC}} = 25$  Hz, *i*-Ph), 130.2 (vt,  $^3J_{\text{PC}} = 6$  Hz, *m*-PPh<sub>2</sub>), 129.04 (naphCH), 123.6 (naphCH), 120.8 (naphC), 109.9 (naphCH), 61.6 (vt,  $^1J_{\text{PC}} = 17$  Hz, NCH<sub>2</sub>P). MS (ESI, +ve ion,  $m/z$ ): Found: 695.0891. Calcd. for  $\text{C}_{38}\text{H}_{30}\text{N}_2\text{O}_2^{103}\text{Rh}$  [M –  $\text{BF}_4$ ]<sup>+</sup>: 695.0888. Anal. Found: C 58.74 H 4.53 N 3.41 %. Calcd. for  $\text{C}_{38}\text{H}_{30}\text{BF}_4\text{N}_2\text{O}_2\text{Rh}$ : C 58.76 H 4.54 N 3.61 %. (b) *Method 2, synthesis of  $[\text{Rh}(\text{CO})(\text{PhPm})]\text{PF}_6$* : To a solution of **4** in benzene was added excess  $[\text{C}_3\text{P}_3]\text{PF}_6$ . Crystals suitable for structural determination deposited immediately from the benzene reaction mixture. Crude  $^{31}\text{P}\{^1\text{H}\}$  NMR spectroscopy estimates 78% conversion alongside two unknown rhodium-containing products. IR ( $\text{CH}_2\text{Cl}_2$ ,  $\text{cm}^{-1}$ ) 2030

$\nu_{\text{CO}}$ , 1586  $\nu_{\text{C=C}}$ .  $^1\text{H NMR}$  (400 MHz,  $\text{CDCl}_3$ , 298 K):  $\delta_{\text{H}} = 7.80$  (m, 8 H,  $\text{PPh}_2$ ), 7.58 (m, 12 H,  $\text{PPh}_2$ ), 7.20, 7.19 (2 x s.br, 2 x 2 H, naphCH), 6.99 (t,  $^3J_{\text{HH}} = 4.3$  Hz, naphCH), 4.96 (t $^v$ ,  $^{2,4}J_{\text{HP}} = 2.8$  Hz,  $\text{NCH}_2\text{P}$ ).  $^{31}\text{P}\{^1\text{H}\}$  NMR (283 MHz,  $\text{CDCl}_3$ , 298 K):  $\delta_{\text{P}} = 36.24$  (d,  $^1J_{\text{PRh}} = 132$  Hz),  $-144.1$  (sept,  $^1J_{\text{FP}} = 713$  Hz,  $\text{PF}_6$ ). MS (ESI, +ve ion,  $m/z$ ): Found: 695.0902. Calcd. for  $\text{C}_{38}\text{H}_{30}\text{N}_2\text{OP}_2^{103}\text{Rh} [\text{M} - \text{PF}_6]^+$ : 695.0888. *Crystal Data for  $\text{C}_{44}\text{H}_{36}\text{F}_6\text{N}_2\text{OP}_3\text{Rh}$  ( $M_w = 918.57$  gmol $^{-1}$ ): monoclinic, space group  $P2_1/n$  (no. 14),  $a = 15.2904(3)$ ,  $b = 16.1205(5)$ ,  $c = 19.0392(6)$  Å,  $\beta = 105.181(3)^\circ$ ,  $V = 4529.2(2)$  Å $^3$ ,  $Z = 4$ ,  $T = 150.0(1)$  K,  $\mu(\text{Cu K}\alpha) = 4.553$  mm $^{-1}$ ,  $D_{\text{calc}} = 1.347$  Mgm $^{-3}$ , 17713 reflections measured ( $8.606^\circ \leq 2\theta \leq 145.874^\circ$ ), 8798 unique ( $R_{\text{int}} = 0.0365$ ,  $R_{\text{sigma}} = 0.0595$ ) which were used in all calculations. The final  $R_1$  was 0.0450 ( $I > 2\sigma(I)$ ) and  $wR_2$  was 0.1163 (all data) for 564 refined parameters with 310 restraints. CCDC 2222025.*

**Synthesis of  $[\text{Rh}(\text{CO})(\text{C}\equiv\text{CSiMe}_3)(\mu\text{-PhH}_2\text{Pm})_2$  (6).** To a solution of lithium trimethylsilylacetylide (0.288 mmol) in THF (15 mL) at  $-78^\circ\text{C}$  was added **2a** (210 mg, 0.144 mmol) and stirred for an hour before allowing the flask to warm to room temperature and stirring for 16 h. Solvent was reduced to 4 mL under reduced pressure, and  $\text{Et}_2\text{O}$  (15 mL) added to afford a small amount of yellow precipitate (unreacted **2a**). The filtrate was collected by cannula filtration, and *n*-hexane (10 mL) added before leaving the flask at  $-20^\circ\text{C}$  overnight, affording a bright yellow precipitate. The product was collected by filtration, washed with  $\text{Et}_2\text{O}$  (2 x 3 mL), *n*-hexane (3 x 15 mL) and dried *in vacuo*. Yield: 142 mg (0.089 mmol, 62%). IR ( $\text{CH}_2\text{Cl}_2$ ,  $\text{cm}^{-1}$ ): 1986  $\nu_{\text{CO}}$ , 1590  $\nu_{\text{C=C}}$ . IR (ATR,  $\text{cm}^{-1}$ ): 1975  $\nu_{\text{CO}}$ , 1589  $\nu_{\text{C=C}}$ . The  $\text{C}\equiv\text{C}$  stretch was not observed perhaps due to overlap with the CO stretch.  $^1\text{H NMR}$  (700 MHz,  $\text{CD}_2\text{Cl}_2$ , 213 K):  $\delta_{\text{H}} = 8.18$ – $6.64$  (series of broad multiplets, 56 H, naphCH and  $\text{PPh}_2$ ), 6.47 (2 H,  $\text{NCH}_2\text{N}$  or  $\text{NCH}_2\text{P}$ ), 6.20 (d, 2 H, naphCH), 6.16, 5.80, 5.34, 4.69, 4.38, 4.25, (8 x m, 8 x 1 H,  $\text{NCH}_2\text{P}$  and  $\text{NCH}_2\text{N}$ ), 0.09 (18 H,  $\text{SiMe}_3$ ).  $^{31}\text{P}\{^1\text{H}\}$  NMR (283 MHz,  $\text{CD}_2\text{Cl}_2$ , 213 K):  $\delta_{\text{P}} = 27.4$  ( $^2J_{\text{RHP}} = 288$  Hz,  $^1J_{\text{RHP}} = 130$  Hz), 15.9 ( $^2J_{\text{RHP}} = 288$  Hz,  $^1J_{\text{RHP}} = 131$  Hz). The complex was insufficiently soluble to acquire useful  $^{13}\text{C}$  NMR data. Peaks were not observed at 298 K due to broadening, the sample precipitated over time at lower temperatures and decomposed at higher temperatures. Anal. found: C 65.00; H 5.177, N 3.74. Calcd. for  $\text{C}_{86}\text{H}_{82}\text{N}_4\text{O}_2\text{P}_4\text{Rh}_2\text{Si}_2$ : C 64.98; H 5.20; N 3.52. *Crystal Data for  $\text{C}_{98}\text{H}_{94}\text{N}_4\text{O}_2\text{P}_4\text{Rh}_2\text{Si}_2$  ( $M_w = 1745.65$  gmol $^{-1}$ ): triclinic, space group  $P-1$  (no. 2),  $a = 12.7185(5)$ ,  $b = 14.3038(6)$ ,  $c = 14.4821(6)$  Å,  $\alpha = 64.079(4)^\circ$ ,  $\beta = 66.091(4)^\circ$ ,  $\gamma = 74.274(4)^\circ$ ,  $V = 2152.08(18)$  Å $^3$ ,  $Z = 1$ ,  $T = 150.0(1)$  K,  $\mu(\text{Cu K}\alpha) = 4.472$  mm $^{-1}$ ,  $D_{\text{calc}} = 1.347$  Mgm $^{-3}$ , 16125 reflections measured ( $7.192^\circ \leq 2\theta \leq 147.388^\circ$ ), 8522 unique ( $R_{\text{int}} = 0.0362$ ,  $R_{\text{sigma}} = 0.0590$ ) which were used in all calculations. The final  $R_1$  was 0.0346 ( $I > 2\sigma(I)$ ) and  $wR_2$  was 0.0808 (all data) for 508 refined parameters without restraints. CCDC 2222024.*

**Synthesis of  $[\text{Rh}(\text{C}\equiv\text{CSiMe}_3)(\text{PhPm})]$  (7).** To a solution of ethynyltrimethylsilane (0.043 mL, 0.299 mmol) in THF (20 mL) at  $-78^\circ\text{C}$  was added  $n\text{-BuLi}$  (1.6 M, 0.20 mL, 0.314 mmol) and stirred, warming to room temperature over 45 mins. This solution was slowly added to a suspension of **1a** (0.200 g, 0.285 mmol) in THF (20 mL) at  $-78^\circ\text{C}$  while stirring. The solution was warmed to room temperature and stirred for 3 hours, causing the orange suspension to turn clear red. The solvent was

reduced to 5 mL and *n*-hexane added (60 mL) to afford a bright orange precipitate. This was collected by filtration, and the solid ultrasonically triturated in  $\text{Et}_2\text{O}$  (20 mL) for 5 minutes. The solid was isolated by filtration and washed with another 15 mL of  $\text{Et}_2\text{O}$  before drying *in vacuo*. Yield: 165 mg (0.217 mmol, 76%). IR ( $\text{CH}_2\text{Cl}_2$ ,  $\text{cm}^{-1}$ ) 2001  $\nu_{\text{C=C}}$ , 1584  $\nu_{\text{C=C}}$ . IR (ATR,  $\text{cm}^{-1}$ ) 1995  $\nu_{\text{C=C}}$ , 1580  $\nu_{\text{C=C}}$ .  $^1\text{H NMR}$  (800 MHz,  $\text{C}_6\text{D}_6$ , 298 K):  $\delta_{\text{H}} = 8.21$  (m, 8 H, *o*- $\text{PPh}_2$ ), 7.19 (d, 2 H,  $^3J_{\text{HH}} = 8.2$  Hz, naphCH), 7.11 (m, 8 H,  $J_{\text{HH}} = 7.6$  Hz, *m*- $\text{PPh}_2$ ), 7.05 (dd, 2 H,  $^3J_{\text{HH}} = 6.9$  Hz, naphCH), 7.03 (m, 4 H,  $J_{\text{HH}} = 6.4$  Hz, *p*- $\text{PPh}_2$ ), 6.12 (d, 2 H,  $^3J_{\text{HH}} = 7.7$  Hz, naphCH), 4.32 (s, 4 H,  $\text{NCH}_2\text{P}$ ), 0.45 (s, 9 H,  $\text{SiCH}_3$ ).  $^{31}\text{P}\{^1\text{H}\}$  NMR (162 MHz,  $\text{C}_6\text{D}_6$ , 298 K):  $\delta_{\text{P}} = 28.64$  (d,  $^1J_{\text{RHP}} = 155$  Hz).  $^{31}\text{C}\{^1\text{H}\}$  NMR (201 MHz,  $\text{C}_6\text{D}_6$ , 298 K):  $\delta_{\text{C}} = 218.4$  (m, NCN, weak peak identified by HMBC), 135.9 (t $^v$ ,  $^{1,3}J_{\text{CP}} = 20$  Hz, *i*- $\text{PPh}_2$ ), 135.2 (t.br,  $^3J_{\text{CP}} = 5$  Hz,  $\text{RhCCSiMe}_3$ ), 134.8 (naphC), 134.0 (m,  $\text{RhCCSiMe}_3$ , tentatively assigned by HMBC NMR), 133.9 (t $^v$ ,  $^{2,4}J_{\text{PC}} = 7$  Hz, *o*- $\text{PPh}_2$ ), 130.0 (*p*- $\text{PPh}_2$ ), 128.7 (t $^v$ ,  $^{3,5}J_{\text{PC}} = 5$  Hz, *m*- $\text{PPh}_2$ ), 128.4 (naphCH), 120.2 (naphCH), 118.6 (naphC), 106.5 (naphCH), 60.7 (t $^v$ ,  $^{2,4}J_{\text{CP}} = 15$  Hz,  $\text{NCH}_2\text{P}$ ), 2.5 (s,  $\text{SiMe}_3$ ). The final naphC resonance was obscured by the solvent peak. MS (ESI, +ve ion,  $m/z$ ): Found: 763.1336. Calcd. for  $\text{C}_{42}\text{H}_{38}\text{N}_2\text{SiP}_2\text{Rh} [\text{M}-\text{H}]^+$ : 763.1335. Found: 779.1287. Calcd. for  $\text{C}_{42}\text{H}_{38}\text{N}_2\text{SiOP}_2\text{Rh} [\text{M}-\text{H}+\text{O}]^+$ : 779.1284. Anal. Found: C 67.76 H 5.31 N 3.30 %. Calcd. for  $\text{C}_{48}\text{H}_{42}\text{N}_2\text{OP}_2\text{RhSi}$ : C 67.37 H 4.95 N 3.27 %. Crystals suitable for structural determination formed upon standing a saturated benzene solution at room temperature overnight. *Crystal Data for  $\text{C}_{51}\text{H}_{48}\text{N}_2\text{P}_2\text{RhSi}$  ( $M_w = 881.85$  gmol $^{-1}$ ): monoclinic, space group  $P2_1/c$  (no. 14),  $a = 9.59280(10)$ ,  $b = 22.3888(2)$ ,  $c = 20.17120(10)$  Å,  $\beta = 95.3060(10)^\circ$ ,  $V = 4313.63(6)$  Å $^3$ ,  $Z = 4$ ,  $T = 150.0(1)$  K,  $\mu(\text{Cu K}\alpha) = 4.450$  mm $^{-1}$ ,  $D_{\text{calc}} = 1.358$  Mgm $^{-3}$ , 44676 reflections measured ( $7.898^\circ \leq 2\theta \leq 147.96^\circ$ ), 8691 unique ( $R_{\text{int}} = 0.0281$ ,  $R_{\text{sigma}} = 0.0213$ ) which were used in all calculations. The final  $R_1$  was 0.0316 ( $I > 2\sigma(I)$ ) and  $wR_2$  was 0.0879 (all data) for 537 refined parameters without restraints. CCDC 2222023.*

**Synthesis of  $[\text{Rh}(\text{C}\equiv\text{CPh})(\text{PhPm})]$  (8).** To a solution of ethynylbenzene (0.046 mL, 0.42 mmol) in THF (20 mL) at  $-78^\circ\text{C}$  was added  $n\text{-BuLi}$  (1.6 M, 0.21 mL, 0.34 mmol) and stirred, warming to room temperature over 45 mins. This solution was slowly added to an orange suspension of **1a** (0.215 g, 0.306 mmol) in THF (15 mL) at  $-78^\circ\text{C}$  while stirring. The solution was warmed to room temperature and stirred for 3 hours, turning clear red. The solvent was reduced to 5 mL and *n*-hexane (60 mL) added to afford a bright orange precipitate. This was collected by filtration, and the solid sonicated in  $\text{Et}_2\text{O}$  (20 mL) for 5 minutes. The solid was isolated by filtration and dried *in vacuo*. Yield: 170 mg (0.221 mmol, 72%). IR ( $\text{CH}_2\text{Cl}_2$ ,  $\text{cm}^{-1}$ ) 2065  $\nu_{\text{C=C}}$ , 1585  $\nu_{\text{C=C}}$ . IR (ATR,  $\text{cm}^{-1}$ ) 2060  $\nu_{\text{C=C}}$ , 1579  $\nu_{\text{C=C}}$ .  $^1\text{H NMR}$  (800 MHz,  $\text{C}_6\text{D}_6$ , 298 K):  $\delta_{\text{H}} = 8.23$  (m, 8 H, *o*- $\text{PPh}_2$ ), 7.67 (d, 2 H,  $^3J_{\text{HH}} = 7.6$  Hz, *o*- $\text{CCC}_6\text{H}_5$ ), 7.19 (d, 2 H,  $^3J_{\text{HH}} = 8.2$  Hz, naphCH), 7.15 (m, 2 H, *m*- $\text{CCC}_6\text{H}_5$ ), 7.06 (t, 8 H,  $^3J_{\text{HH}} = 7$  Hz, *m*- $\text{PPh}_2$ ), 7.04 (t, 2 H,  $^3J_{\text{HH}}$  obscured due to overlap with  $\text{PPh}_2$  group, naphCH), 6.99 (t, 4 H,  $^3J_{\text{HH}} = 7$  Hz, *p*- $\text{PPh}_2$ ), 6.97 (t, 1 H,  $^3J_{\text{HH}} = 7$  Hz, *p*- $\text{CCC}_6\text{H}_5$ ), 6.13 (d, 2 H,  $^3J_{\text{HH}} = 7.6$  Hz, naphCH), 4.33 (s, 4 H,  $\text{NCH}_2\text{PPh}_2$ ).  $^{31}\text{P}\{^1\text{H}\}$  NMR (162 MHz,  $\text{C}_6\text{D}_6$ , 298 K):  $\delta_{\text{P}} = 29.41$  (d,  $^1J_{\text{PRh}} = 154$  Hz).  $^{13}\text{C}\{^1\text{H}\}$  NMR (201 MHz,  $\text{C}_6\text{D}_6$ , 298 K):  $\delta_{\text{C}} = 217.4$  (NCN, resonance too weak to observe in 1-D NMR was identified by HMBC NMR), 135.9 (t $^v$ ,  $^{1,3}J_{\text{CP}} = 21$  Hz, *i*- $\text{PPh}_2$ ), 135.3, 134.8

(naphC), 133.8 (m, o-PPh<sub>2</sub>), 131.5 (naphC), 131.05 (i-CCPh), 130.0 (m, p-PPh<sub>2</sub>), 128.8 (m-PPh<sub>2</sub>), 128.7 to 127.7 (overlapping peaks obscured by solvent peak, naphCH, CCPh, o-CCPh, p-CCPh), 124.3 (m-CCPh), 120.1, 118.5, 106.8, 106.3 (naphCH and naphC), 60.6 (v<sup>t</sup>, <sup>3</sup>J<sub>CP</sub> = 15 Hz, NCH<sub>2</sub>P). MS (ESI, +ve ion, m/z): Found: 768.1326. Calcd. for C<sub>45</sub>H<sub>38</sub>N<sub>2</sub>P<sub>2</sub><sup>103</sup>Rh [M]<sup>+</sup>: 768.1331. Found: 791.1222. Calcd. for C<sub>45</sub>H<sub>38</sub>N<sub>2</sub>P<sub>2</sub><sup>103</sup>RhNa [M+Na]<sup>+</sup>: 791.1228. Anal. Found: C 69.93 H 5.255 N 3.77 %. Calcd. for C<sub>45</sub>H<sub>38</sub>N<sub>2</sub>P<sub>2</sub>Rh: C 70.04 H 4.96 N 3.63 %. Crystals suitable for structural determination were grown by slow diffusion of pentane into a saturated benzene solution at room temperature. Crystal Data for C<sub>51</sub>H<sub>41</sub>N<sub>2</sub>P<sub>2</sub>Rh (M<sub>w</sub> = 846.71 gmol<sup>-1</sup>): monoclinic, space group P2<sub>1</sub>/n (no. 14), a = 9.81730(10), b = 25.6987(3), c = 16.1102(2) Å, β = 97.0220(10)°, V = 4033.99(8) Å<sup>3</sup>, Z = 4, T = 150.0(1) K, μ(Cu Kα) = 4.464 mm<sup>-1</sup>, D<sub>calc</sub> = 1.394 Mg m<sup>-3</sup>, 29911 reflections measured (6.88° ≤ 2θ ≤ 148.26°), 8097 unique (R<sub>int</sub> = 0.0277, R<sub>sigma</sub> = 0.0252) which were used in all calculations. The final R<sub>1</sub> was 0.0314 (I > 2σ(I)) and wR<sub>2</sub> was 0.0840 (all data) for 505 refined parameters without restraints. CCDC 2222022.

## References

- 1 CrysAlis PRO, Agilent Technologies Ltd, Yarnton, Oxfordshire, England, 2014.
- 2 (a) G. M. Sheldrick, *Acta Crystallogr. Sect. A: Found. Crystallogr.*, 2008, **64**, 112; (b) G. M. Sheldrick, *Acta Crystallogr. Sect. C: Cryst. Struct. Commun.*, 2015, 71, 3.
- 3 (a) C. F. Macrae, P. R. Edgington, P. McCabe, E. Pidcock, G. P. Shields, R. Taylor, M. Towler and J. van de Streek, *J. Appl. Crystallogr.*, 2006, **39**, 453; (b) C. F. Macrae, I. J. Bruno, J. A. Chisholm, P. R. Edgington, P. McCabe, E. Pidcock, L. Rodriguez-Monge, R. Taylor, J. van de Streek and P. A. Wood, *J. Appl. Crystallogr.*, 2008, **41**, 466.
- 4 T. M. McPhillips, S. E. McPhillips, H.-J. Chiu, A. E. Cohen, A. M. Deacon, P. J. Ellis, E. Garman, A. Gonzalez, N. K. Sauter, R. P. Phizackerley, S. M. Soltis, P. Kuhn, *Journal of Synchrotron Radiation*, 2002, **9**, 401.
- 5 W. Kabsch, *J. Appl. Crystallogr.*, 1993, **26**, 795-800.
- 6 A. F. Hill and C. M. A. McQueen, *Organometallics*, 2012, **31**, 8051.
- 7 D. Evans, J. A. Osborn and G. Wilkinson, *Inorg. Synth.*, 1990, **28**, 79.
- 8 M. Kubota and C. O. M. Ho, *Inorg. Synth.*, 1979, **19**, 204.
- 9 N. Ahmad, J. J. Levison and S. D. Robinson, *Inorg. Synth.*, 1990, **28**, 81.
- 10 W. Rand Kenan Jr, P. Singh, C. B. Dammann and D. J. Hodgson, *Inorg. Chem.*, 1973, **12**, 1335.
- 11 D. Evans, G. Yagupsky and G. Wilkinson, *J. Chem. Soc. (A)*, 1968, 2660.
- 12 D. M. Ottmers and H. F. Rase, *Carbon N Y*, 1966, **4**, 125.
- 13 R. P. Hughes, J. W. Reisch and A. L. Rheingold, *Organometallics*, 1985, **4**, 1754.
- 14 R. Breslow and R. Xu, *Org. Synth.*, 1997, **74**, 72.
- 15 *Spartan 20*® (2020) Wavefunction, Inc., 18401 Von Karman Ave., Suite 370 Irvine, CA 92612 U.S.A.
- 16 J. D. Chai and M. Head-Gordon, *J Chem Phys.*, 2008, **128**, 084106.
- 17 J. D. Chai and M. Head-Gordon, *Phys Chem Chem Phys*, 2008, **10**, 6615-6620.
- 18 P. J. Hay and W. R. Wadt, *J. Chem. Phys.*, 1985, **82**, 270-283.
- 19 P. J. Hay and W. R. Wadt, *J. Chem. Phys.*, 1985, **82**, 299-310.
- 20 W. R. Wadt and P. J. Hay, *J. Chem. Phys.*, 1985, **82**, 284-298.

21 W. J. Hehre, R. Ditchfeld and J. A. Pople, *J. Chem. Phys.*, 1972, **56**, 2257-2261.

## Additional Crystal Data

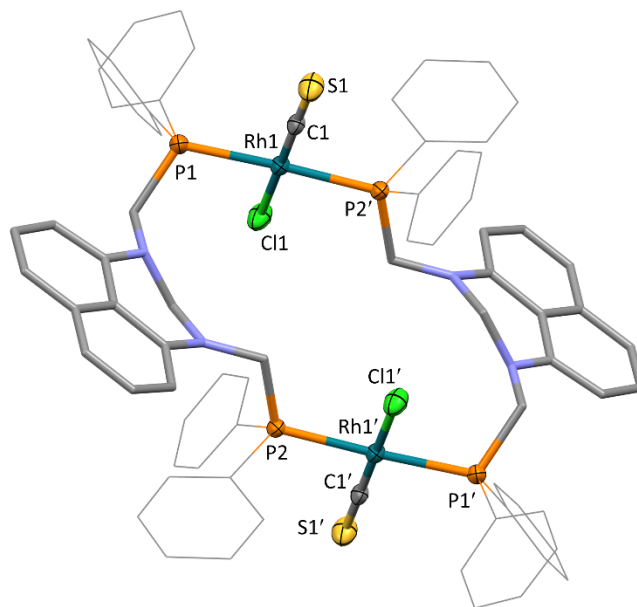

Molecular structure of **3a** in a crystal of **3a**·(CHCl<sub>3</sub>). (30% displacement ellipsoids, naphthalene and phenyl groups simplified, hydrogen atoms and solvent omitted for clarity, only one-half of the C<sub>2</sub>-symmetric molecule is unique). Selected distances [Å] and angles [°]: Rh1–C1 1.786(5), C1–S1 1.549(5), Rh1–Cl1 2.3817(12), Rh1–P1 2.3200(10), Rh1–P2 2.3285(11), Cl1–Rh1–C1 177.36(15), P1–Rh1–P2' 177.22(4), Rh1–C1–S1 178.2(3).

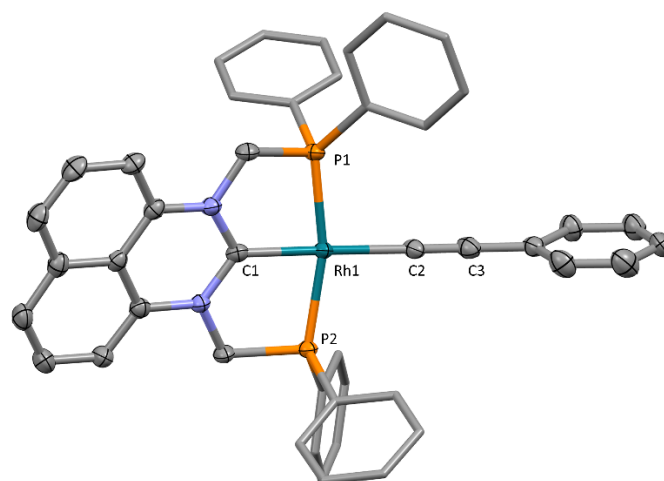

Molecular structure of **8** in a crystal of **8**·(C<sub>6</sub>H<sub>6</sub>). (50% displacement ellipsoids, naphthalene and phenyl groups simplified, hydrogen atoms and solvent omitted for clarity). Selected distances [Å] and angles [°]: Rh1–C1 1.999(3), Rh1–C2 2.043(3), C2–C3 1.204(4), Rh1–P1 2.2305(6), Rh1–P2 2.2233(6), C1–Rh1–C2 173.71(11), Rh1–C2–C3 171.5(3), P1–Rh1–P2 165.52(3).

## Computational Results

1. 1,3-dimethyl-2,3-dihydro-1*H*-perimidine

## Electrostatic Potential Surface

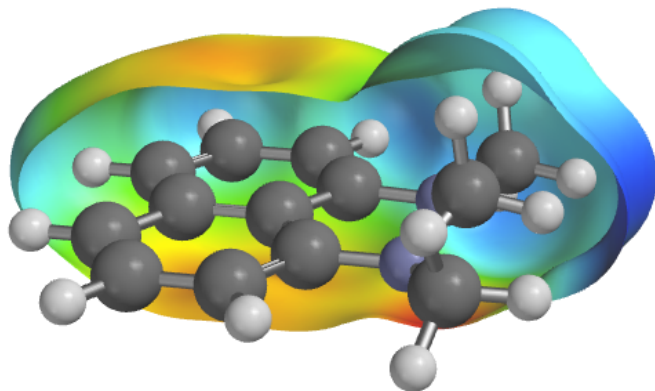

## Cartesian Coordinates

| Atom | x         | y         | z         |
|------|-----------|-----------|-----------|
| H    | 3.359002  | 0.036368  | -2.671278 |
| C    | 2.411906  | 0.007619  | -2.139844 |
| H    | 1.231231  | 0.187788  | -3.916117 |
| C    | 1.235078  | 0.095823  | -2.833894 |
| C    | 1.241711  | -0.152493 | -0.026171 |
| C    | -0.003501 | 0.059425  | -2.142348 |
| C    | 2.428248  | -0.111193 | -0.735113 |
| C    | -0.002027 | -0.057798 | -0.728408 |
| C    | -1.243671 | 0.121748  | -2.828992 |
| H    | 3.382191  | -0.162975 | -0.224022 |
| C    | -2.419503 | 0.057904  | -2.130283 |
| H    | -1.242107 | 0.213733  | -3.911222 |
| H    | -3.367868 | 0.106533  | -2.658031 |
| C    | -2.433058 | -0.060635 | -0.725514 |
| H    | -3.385825 | -0.092802 | -0.210953 |
| C    | -1.244914 | -0.125981 | -0.021155 |
| N    | -1.185700 | -0.278495 | 1.362668  |
| N    | 1.184094  | -0.305638 | 1.357103  |
| C    | -2.402618 | -0.131431 | 2.127647  |
| H    | -2.857405 | 0.868220  | 2.028894  |
| H    | -2.183000 | -0.312611 | 3.182998  |
| H    | -3.137417 | -0.876838 | 1.810421  |
| C    | 2.407029  | -0.187784 | 2.117661  |
| H    | 2.886103  | 0.800225  | 2.016043  |
| H    | 3.121357  | -0.952000 | 1.798019  |
| H    | 2.187116  | -0.362521 | 3.174071  |
| C    | 0.007132  | 0.262430  | 1.976779  |
| H    | 0.020162  | 1.372629  | 1.917776  |
| H    | 0.006254  | -0.019251 | 3.033266  |

## Thermodynamic Properties at 298.15 K

|                          |             |         |                                                |
|--------------------------|-------------|---------|------------------------------------------------|
| Zero Point Energy :      | 615.48      | kJ/mol  | (ZPE)                                          |
| Temperature Correction : | 32.49       | kJ/mol  | (vibration + gas law + rotation + translation) |
| Enthalpy Correction :    | 647.97      | kJ/mol  | (ZPE + temperature correction)                 |
| Enthalpy :               | -612.875955 | au      | (Electronic Energy + Enthalpy Correction)      |
| Entropy :                | 430.80      | J/mol•K |                                                |
| Gibbs Energy :           | -612.924877 | au      | (Enthalpy - T*Entropy)                         |
| C <sub>v</sub> :         | 215.58      | J/mol•K |                                                |

## 2. $[\text{Rh}_2(\mu\text{-CO})_2(\text{PH}_3)_4](\text{Rh-Rh})$

### Cartesian Coordinates

| Atom | x         | y         | z         |
|------|-----------|-----------|-----------|
| Rh   | 0.391384  | 1.294974  | 0.185677  |
| Rh   | -0.350599 | -1.301115 | -0.213765 |
| C    | -0.979758 | 0.433348  | -1.001682 |
| C    | 1.106112  | -0.450663 | 0.878486  |
| O    | -1.770053 | 0.769728  | -1.815207 |
| O    | 1.984911  | -0.803088 | 1.587203  |
| P    | 0.107220  | 3.208408  | -1.141705 |
| H    | 0.659776  | 3.147973  | -2.438564 |
| H    | 0.616774  | 4.480585  | -0.799278 |
| H    | -1.183779 | 3.625631  | -1.522793 |
| P    | 1.408433  | 2.347260  | 2.015181  |
| H    | 2.423810  | 1.700793  | 2.751336  |
| H    | 0.556718  | 2.644240  | 3.102348  |
| H    | 2.017794  | 3.620819  | 1.943045  |
| P    | -2.413361 | -2.236621 | -0.826080 |
| H    | -3.369205 | -2.378729 | 0.203127  |
| H    | -2.549311 | -3.543335 | -1.350247 |
| H    | -3.242543 | -1.578384 | -1.756401 |
| P    | 0.842043  | -3.311907 | 0.016030  |
| H    | 2.033208  | -3.405648 | -0.734753 |
| H    | 0.318120  | -4.575032 | -0.340462 |
| H    | 1.392307  | -3.689239 | 1.258505  |

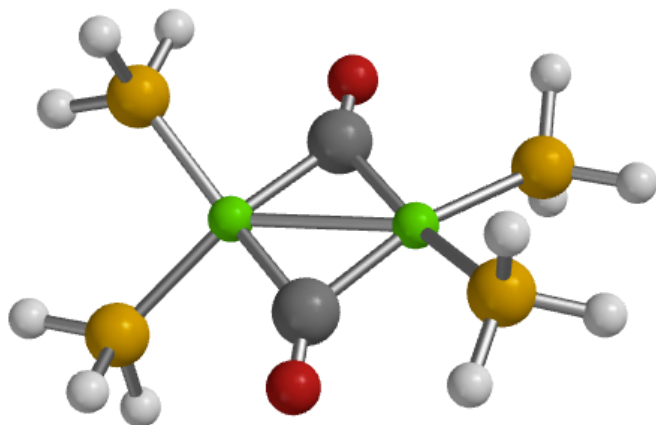

### Thermodynamic Properties at 298.15 K

|                          |              |         |                                                |
|--------------------------|--------------|---------|------------------------------------------------|
| Zero Point Energy :      | 320.40       | kJ/mol  | (ZPE)                                          |
| Temperature Correction : | 45.19        | kJ/mol  | (vibration + gas law + rotation + translation) |
| Enthalpy Correction :    | 365.59       | kJ/mol  | (ZPE + temperature correction)                 |
| Enthalpy :               | -1818.094713 | au      | (Electronic Energy + Enthalpy Correction)      |
| Entropy :                | 531.71       | J/mol·K |                                                |
| Gibbs Energy :           | -1818.155094 | au      | (Enthalpy - T*Entropy)                         |
| $C_V$ :                  | 261.98       | J/mol·K |                                                |

## 3. $[\text{Rh}_2(\mu\text{-CO})_2(\text{MeH}_2\text{Pm})_2](\text{Rh-Rh})$

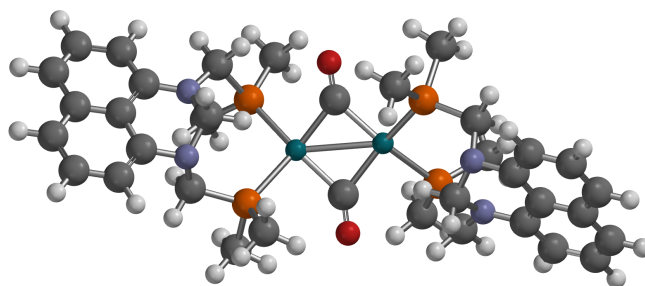

### Thermodynamic Properties at 298.15 K

|                          |              |         |                                                |
|--------------------------|--------------|---------|------------------------------------------------|
| Zero Point Energy :      | 1973.72      | kJ/mol  | (ZPE)                                          |
| Temperature Correction : | 118.11       | kJ/mol  | (vibration + gas law + rotation + translation) |
| Enthalpy Correction :    | 2091.84      | kJ/mol  | (ZPE + temperature correction)                 |
| Enthalpy :               | -3353.443086 | au      | (Electronic Energy + Enthalpy Correction)      |
| Entropy :                | 988.74       | J/mol·K |                                                |
| Gibbs Energy :           | -3353.555367 | au      | (Enthalpy - T*Entropy)                         |
| $C_V$ :                  | 868.09       | J/mol·K |                                                |

## Cartesian Coordinates

| Atom | x         | y         | z         |
|------|-----------|-----------|-----------|
| Rh   | 1.348682  | -0.046792 | 1.076250  |
| P    | 2.844071  | 1.419987  | 2.134769  |
| P    | 2.830927  | -1.473775 | -0.050118 |
| O    | -0.130130 | -2.651958 | 0.827456  |
| N    | 4.446448  | 2.064565  | 0.014377  |
| N    | 4.421517  | 0.262976  | -1.579715 |
| C    | 7.752386  | 1.989042  | -1.674124 |
| C    | 6.411011  | 1.681748  | -1.319873 |
| C    | 5.743147  | 0.621714  | -1.998638 |
| C    | 3.743298  | 1.450421  | -1.103977 |
| H    | 2.728521  | 1.200946  | -0.784199 |
| H    | 3.682877  | 2.150204  | -1.949613 |
| C    | 6.499386  | 3.346775  | 0.446276  |
| H    | 6.057748  | 3.906840  | 1.261696  |
| C    | 4.482857  | -0.842381 | -0.614655 |
| H    | 5.062397  | -0.570955 | 0.282643  |
| H    | 5.010345  | -1.669675 | -1.100843 |
| C    | -0.043090 | -1.470434 | 0.955416  |
| C    | 5.768438  | 2.399011  | -0.247301 |
| C    | 6.371961  | -0.079697 | -2.998043 |
| H    | 5.831955  | -0.875436 | -3.502308 |
| C    | 8.367665  | 1.251205  | -2.718342 |
| H    | 9.390557  | 1.493670  | -2.993371 |
| C    | 7.832324  | 3.633326  | 0.085882  |
| H    | 8.366432  | 4.395174  | 0.646781  |
| C    | 8.450364  | 2.992433  | -0.954295 |
| H    | 9.474078  | 3.228808  | -1.228821 |
| C    | 7.695553  | 0.242970  | -3.361096 |
| H    | 8.180599  | -0.312881 | -4.158103 |
| Rh   | -1.351564 | 0.043681  | 1.077015  |
| P    | -2.846308 | -1.433785 | 2.125709  |
| P    | -2.829516 | 1.471516  | -0.055251 |
| O    | 0.125768  | 2.651794  | 0.831664  |
| N    | -4.433669 | -2.066633 | -0.007080 |
| N    | -4.420644 | -0.258262 | -1.594720 |
| C    | -7.756932 | -1.973463 | -1.660353 |
| C    | -6.410811 | -1.672099 | -1.319587 |
| C    | -3.617702 | -2.706102 | 1.001912  |
| H    | -2.800470 | -3.285888 | 0.551006  |
| H    | -4.214682 | -3.395523 | 1.600157  |
| C    | -5.744351 | -0.617356 | -2.007320 |
| C    | -3.738859 | -1.446566 | -1.127247 |
| H    | -2.722802 | -1.197036 | -0.810970 |
| H    | -3.681959 | -2.142889 | -1.976043 |
| C    | -6.495104 | -3.320590 | 0.461963  |
| H    | -6.052220 | -3.872529 | 1.282254  |
| C    | -4.482465 | 0.842211  | -0.624049 |
| H    | -5.061690 | 0.567424  | 0.272416  |
| H    | -5.008763 | 1.672423  | -1.106583 |
| C    | 0.040127  | 1.470419  | 0.958074  |
| C    | -5.761835 | -2.387523 | -0.249481 |
| C    | -6.377030 | 0.082101  | -3.005471 |
| H    | -5.837814 | 0.874538  | -3.515733 |
| C    | -8.376388 | -1.238550 | -2.704327 |
| H    | -9.402715 | -1.477150 | -2.969741 |
| C    | -7.832801 | -3.600977 | 0.115093  |
| H    | -8.367803 | -4.352755 | 0.688596  |
| C    | -8.454955 | -2.966877 | -0.927095 |
| H    | -9.482289 | -3.199340 | -1.191209 |
| C    | -7.704407 | -0.237290 | -3.357864 |
| H    | -8.192921 | 0.316537  | -4.154160 |
| C    | 3.640141  | 2.698313  | 1.034848  |
| H    | 4.252779  | 3.356328  | 1.652362  |
| H    | 2.836974  | 3.308678  | 0.598539  |
| C    | -3.364756 | 2.995824  | 0.821609  |
| H    | -2.463099 | 3.537957  | 1.120266  |
| H    | -3.919472 | 2.725207  | 1.724901  |
| H    | -3.986366 | 3.641446  | 0.191258  |
| C    | -2.160491 | 2.140125  | -1.629758 |
| H    | -1.219449 | 2.654077  | -1.419661 |
| H    | -2.864012 | 2.834181  | -2.102598 |
| H    | -1.967039 | 1.308446  | -2.312049 |
| C    | -4.337583 | -0.766538 | 2.970030  |
| H    | -4.038700 | 0.025353  | 3.662598  |
| H    | -4.871303 | -1.547308 | 3.522858  |
| H    | -5.015978 | -0.339622 | 2.227039  |
| C    | -2.135281 | -2.522150 | 3.426897  |
| H    | -1.737368 | -1.899661 | 4.233089  |
| H    | -1.308822 | -3.091597 | 2.995244  |
| H    | -2.882526 | -3.210156 | 3.838210  |
| C    | 3.365687  | -2.995469 | 0.831873  |
| H    | 3.990428  | -3.641489 | 0.205019  |
| H    | 2.463916  | -3.538323 | 1.128901  |
| H    | 3.917057  | -2.721646 | 1.736230  |
| C    | 2.166537  | -2.147036 | -1.624248 |
| H    | 2.870862  | -2.843066 | -2.093047 |
| H    | 1.975668  | -1.317266 | -2.309580 |
| H    | 1.224493  | -2.659898 | -1.415601 |
| C    | 2.131315  | 2.504602  | 3.437814  |
| H    | 2.879921  | 3.185144  | 3.858898  |
| H    | 1.723816  | 1.879322  | 4.237033  |
| H    | 1.311292  | 3.082030  | 3.004466  |
| C    | 4.322296  | 0.732978  | 2.986477  |
| H    | 5.008148  | 0.316858  | 2.244030  |
| H    | 4.012585  | -0.069592 | 3.661690  |
| H    | 4.851583  | 1.502657  | 3.558677  |

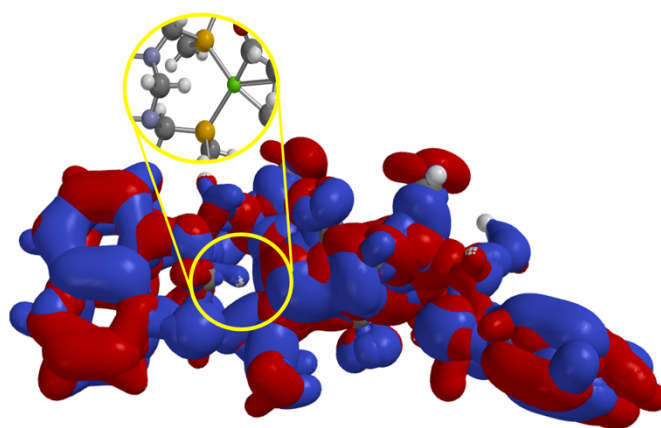

Superposition of 30 HOMOs indicating no effective overlap between C-H and Rh



## ARTICLE

Table of selected inconclusive reaction conditions.

| Complex | Reagent                               | Solvent                  | Temperature (°C) | Observation                                                                                                                                                                                                                                                              |
|---------|---------------------------------------|--------------------------|------------------|--------------------------------------------------------------------------------------------------------------------------------------------------------------------------------------------------------------------------------------------------------------------------|
| 2a      | DMAD                                  | Toluene                  | 25               | No reaction.                                                                                                                                                                                                                                                             |
| 3a      | Methyl propiolate                     | Toluene                  | 25               | No reaction.                                                                                                                                                                                                                                                             |
| 2a      | DMAD                                  | Toluene                  | 110              | Loss of all $^1\text{H}$ and $^{31}\text{P}$ NMR signals other than DMAD.                                                                                                                                                                                                |
| 3a      | Methyl propiolate                     | Toluene                  | 110              | $^{31}\text{P}$ NMR singlets at 24.5 ppm, 10.7 ppm. Small $^1\text{H}$ signals at 12, 9 ppm, messy $^1\text{H}$ NMR resonances between 5 and 6 ppm.                                                                                                                      |
| 2a      | CO                                    | $\text{CH}_2\text{Cl}_2$ | 25               | Loss of all $^1\text{H}$ and $^{31}\text{P}$ NMR signals. IR too broad to assign peaks.                                                                                                                                                                                  |
| 2a      | $\text{H}_2$                          | $\text{CH}_2\text{Cl}_2$ | 25               | Loss of all $^1\text{H}$ and $^{31}\text{P}$ NMR signals. IR too broad to assign peaks.                                                                                                                                                                                  |
| 3a      | $\text{H}_2$                          | $\text{CH}_2\text{Cl}_2$ | 25               | Too insoluble to observe $^{31}\text{P}$ signals. Variety of $^1\text{H}$ signals between 5 and 6 ppm indicating no major product. Nothing separable on workup.                                                                                                          |
| 2a      | $\text{C}_3\text{Ph}_3\text{PF}_6$    | $\text{CH}_2\text{Cl}_2$ | 25               | No observable reaction.                                                                                                                                                                                                                                                  |
| 2a      | Diphenylacetylene                     | Toluene                  | 110              | No observable reaction.                                                                                                                                                                                                                                                  |
| 2a      | $\text{AgPF}_6$                       | MeCN                     | 25               | Highly sensitive and insoluble yellow product which turned brown before NMR acquisition. No $^{31}\text{P}$ peaks of the brown product were observed.                                                                                                                    |
| 2a      | TBAF, 1,4-bis-trimethylsilylbutadiyne |                          |                  | Too insoluble to observe $^{31}\text{P}$ NMR resonances. Multiple $^1\text{H}$ peaks between 4.5 and 7.0 ppm due to several $\text{PhH}_2\text{Pm}$ ligand systems. None correspond to that of <b>6</b> . Nothing separable on workup.                                   |
| 3a      | $\text{KC}_8$                         | Toluene                  | 25               | Clean formation of a new, still insoluble, symmetrical product ( $\delta_{\text{P}} = 17.2$ , $^1J_{\text{RHP}} = 188$ Hz) which decomposed over time or upon workup.                                                                                                    |
| 4       | $\text{CO}_2$                         | THF                      | 25               | Lack of repeatability in results. By $^{31}\text{P}\{^1\text{H}\}$ NMR we have observed sharp doublets at 23.7 ppm (78 Hz), 19.45 ppm (125 Hz), 22.18 ppm (155 Hz), 26.12 ppm (193 Hz) and 20.22 ppm (140 Hz). There are also singlets at 25.0 ppm (unknown) and -26 ppm |

|   |                                  |                               |     |                                                                                                                                                                                                                                                                                              |
|---|----------------------------------|-------------------------------|-----|----------------------------------------------------------------------------------------------------------------------------------------------------------------------------------------------------------------------------------------------------------------------------------------------|
|   |                                  |                               |     | (Free PhH <sub>2</sub> Pm ligand). Proved inseparable and prone to further reaction with atmosphere of .                                                                                                                                                                                     |
| 4 | CS <sub>2</sub>                  | THF                           | 25  | Loss of all NMR resonances presumably due to extreme broadening or precipitation from the mixture (no major ppt was observed by eye however) nothing separable on workup.                                                                                                                    |
| 4 | H <sub>2</sub>                   | THF                           | 25  | Busy forest of <sup>31</sup> P NMR peaks between 5 and 45 ppm, unknown splitting. At least 7 resonances between -8 and -13 ppm by <sup>1</sup> H NMR indicative of metal hydride species.                                                                                                    |
| 4 | Dimethylacetylene dicarboxylate  | THF                           | 25  | By <sup>31</sup> P{ <sup>1</sup> H} NMR singlets at 10.3 and 25.9 ppm were observed along with two doublets of doublets (49.9 ppm, 159 and 14 Hz), (26.9 ppm, 124 and 14 Hz couplings). Over time rearranged to 4 new doublets and 6 singlets. No species proved separable for purification. |
| 4 | 1,4-diphenylbutadiyne            | THF                           | 25  | Various broad peaks between 0 and 60 ppm by <sup>31</sup> P{ <sup>1</sup> H} NMR spectroscopy. One sharp singlet at 25 ppm. <sup>1</sup> H NMR dominated by excess organic reagent.                                                                                                          |
| 4 | 1,4-bis(trimethylsilyl)butadiyne | THF                           | 25  | Too insoluble to observe <sup>31</sup> P NMR resonances. Multiple <sup>1</sup> H peaks between 4.5 and 7.0 ppm due to several PhH <sub>2</sub> Pm ligand systems. Nothing separable on workup.                                                                                               |
| 4 | S <sub>8</sub>                   | THF                           | 25  | Loss of all NMR resonances, possibly due to precipitation, difficult to know due to excess S <sub>8</sub> in solution. Nothing separable on workup.                                                                                                                                          |
| 4 | Ferrocenium hexafluorophosphate  | C <sub>6</sub> D <sub>6</sub> | 25  | Slow (multi-day), clean conversion to 5.                                                                                                                                                                                                                                                     |
| 5 | benzaldehyde                     | -                             | 110 | Decomposition. Loss of starting material signals and formation of <sup>31</sup> P{ <sup>1</sup> H} NMR singlets at 43.9 and 28.7 ppm.                                                                                                                                                        |

## ARTICLE

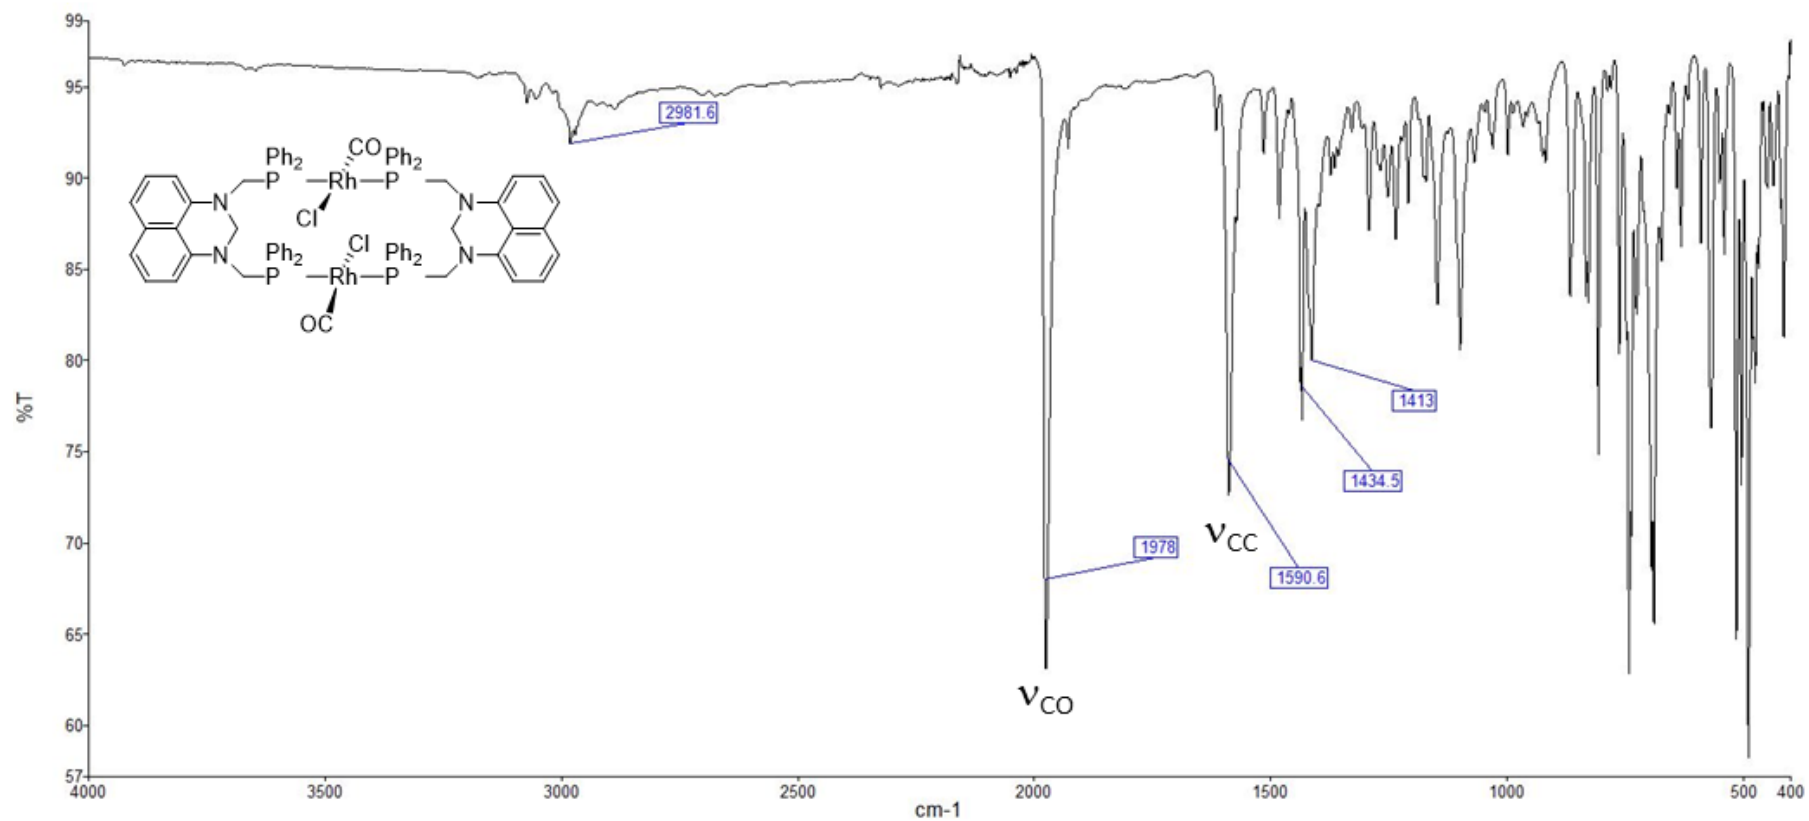IR (ATR,  $\text{cm}^{-1}$ ) for  $[\text{RhCl}(\text{CO})(\mu\text{-PhH}_2\text{Pm})]_2$  (**2a**).

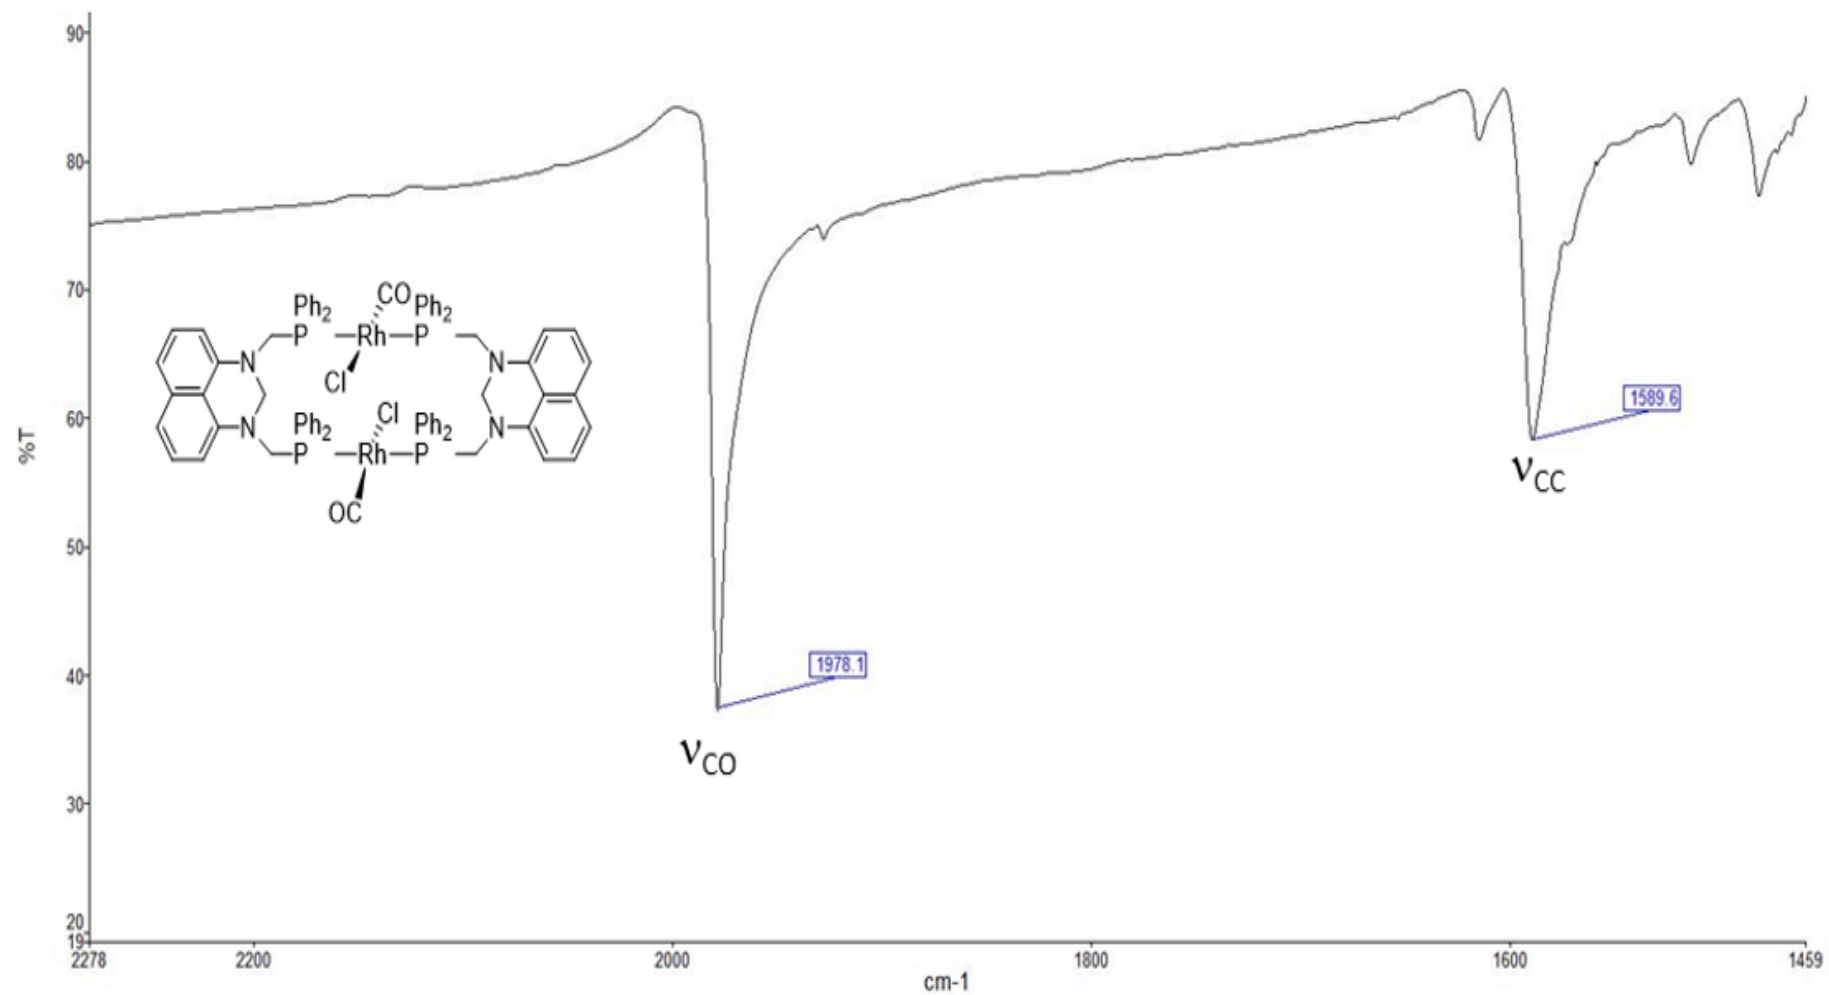

IR ( $\text{CH}_2\text{Cl}_2$ ,  $\text{cm}^{-1}$ ) for  $[\text{RhCl}(\text{CO})(\mu\text{-PhH}_2\text{Pm})]_2$  (**2a**).

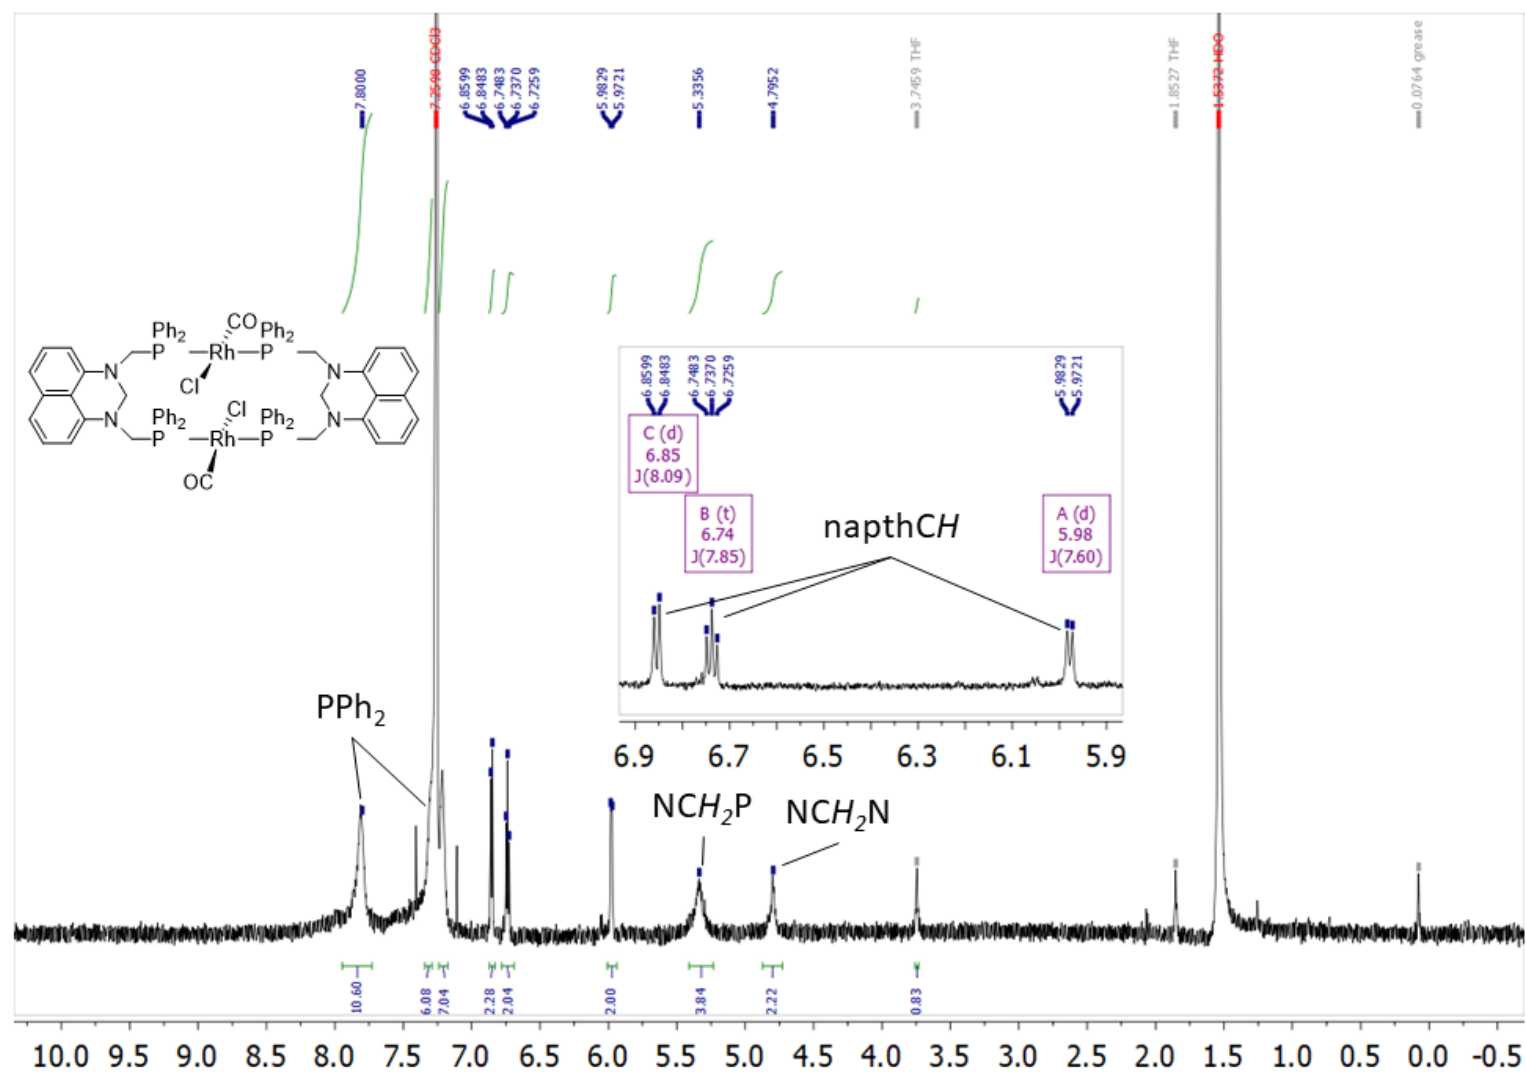

$^1\text{H}$  NMR (700 MHz,  $\text{CDCl}_3$ , 298K) for  $[\text{RhCl}(\text{CO})(\mu\text{-PhH}_2\text{Pm})]_2$  (**2a**).

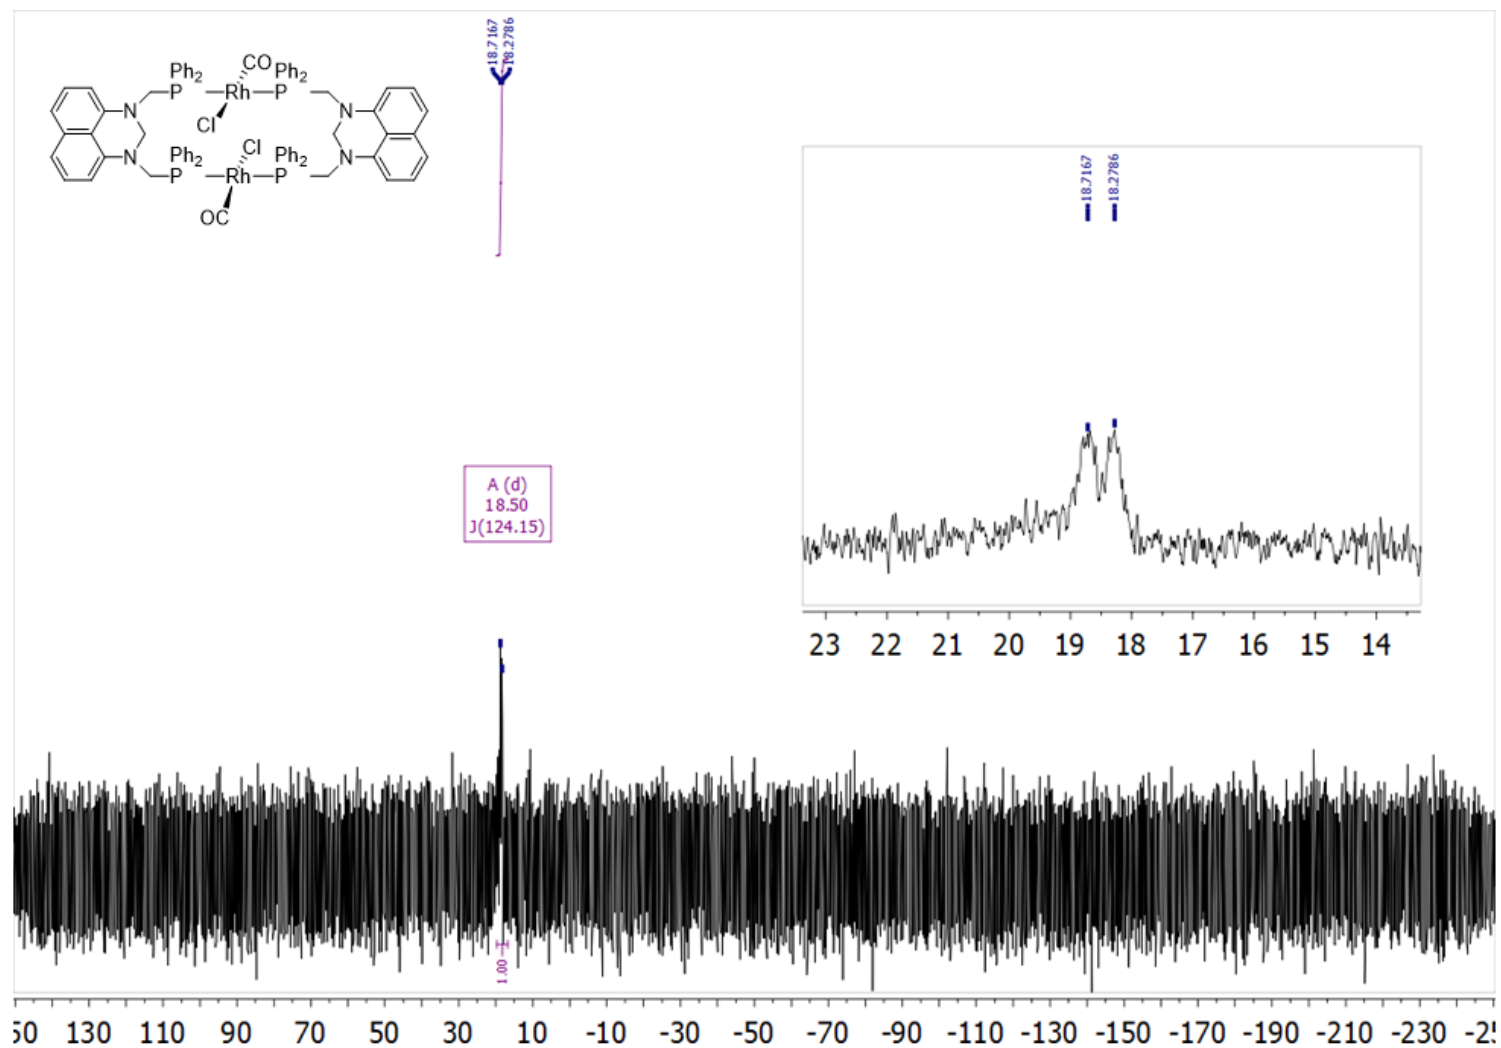

$^{31}\text{P}\{^1\text{H}\}$  NMR (283 MHz,  $\text{CDCl}_3$ , 298 K) for  $[\text{RhCl}(\text{CO})(\mu\text{-PhH}_2\text{Pm})_2]$  (**2a**).

**Single Mass Analysis**

Tolerance = 3.0 PPM / DBE: min = -1.5, max = 50.0

Element prediction: Off

Number of isotope peaks used for i-FIT = 3

Monoisotopic Mass, Even Electron Ions

944 formula(e) evaluated with 1 results within limits (up to 50 best isotopic matches for each mass)

Elements Used:

C: 0-80 H: 0-70 N: 0-5 O: 0-2 P: 0-4 35Cl: 0-1 37Cl: 0-1 103Rh: 0-2

LJW-343/AJ

SYNAPT G2-Si#NotSet

66312

0066 40 (0.100) Cm (29:360)

03-Feb-2021

12:12:09

1: TOF MS ES+

6.01e+006

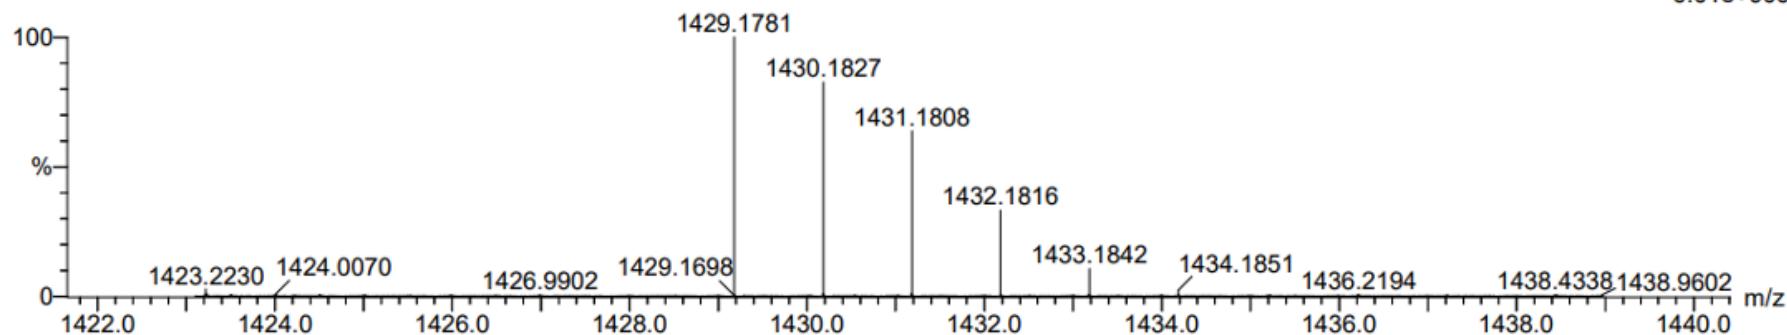

Minimum: -1.5  
 Maximum: 5.0 3.0 50.0

| Mass      | Calc. Mass | mDa | PPM | DBE  | i-FIT  | Norm | Conf (%) | Formula                      |
|-----------|------------|-----|-----|------|--------|------|----------|------------------------------|
| 1429.1781 | 1429.1778  | 0.3 | 0.2 | 48.5 | 4856.3 | n/a  | n/a      | C76 H64 N4 O2 P4 35Cl 103Rh2 |

MS (ESI, +ve ion) for  $[\text{RhCl}(\text{CO})(\mu\text{-PhH}_2\text{Pm})_2]_2$  (**2a**).

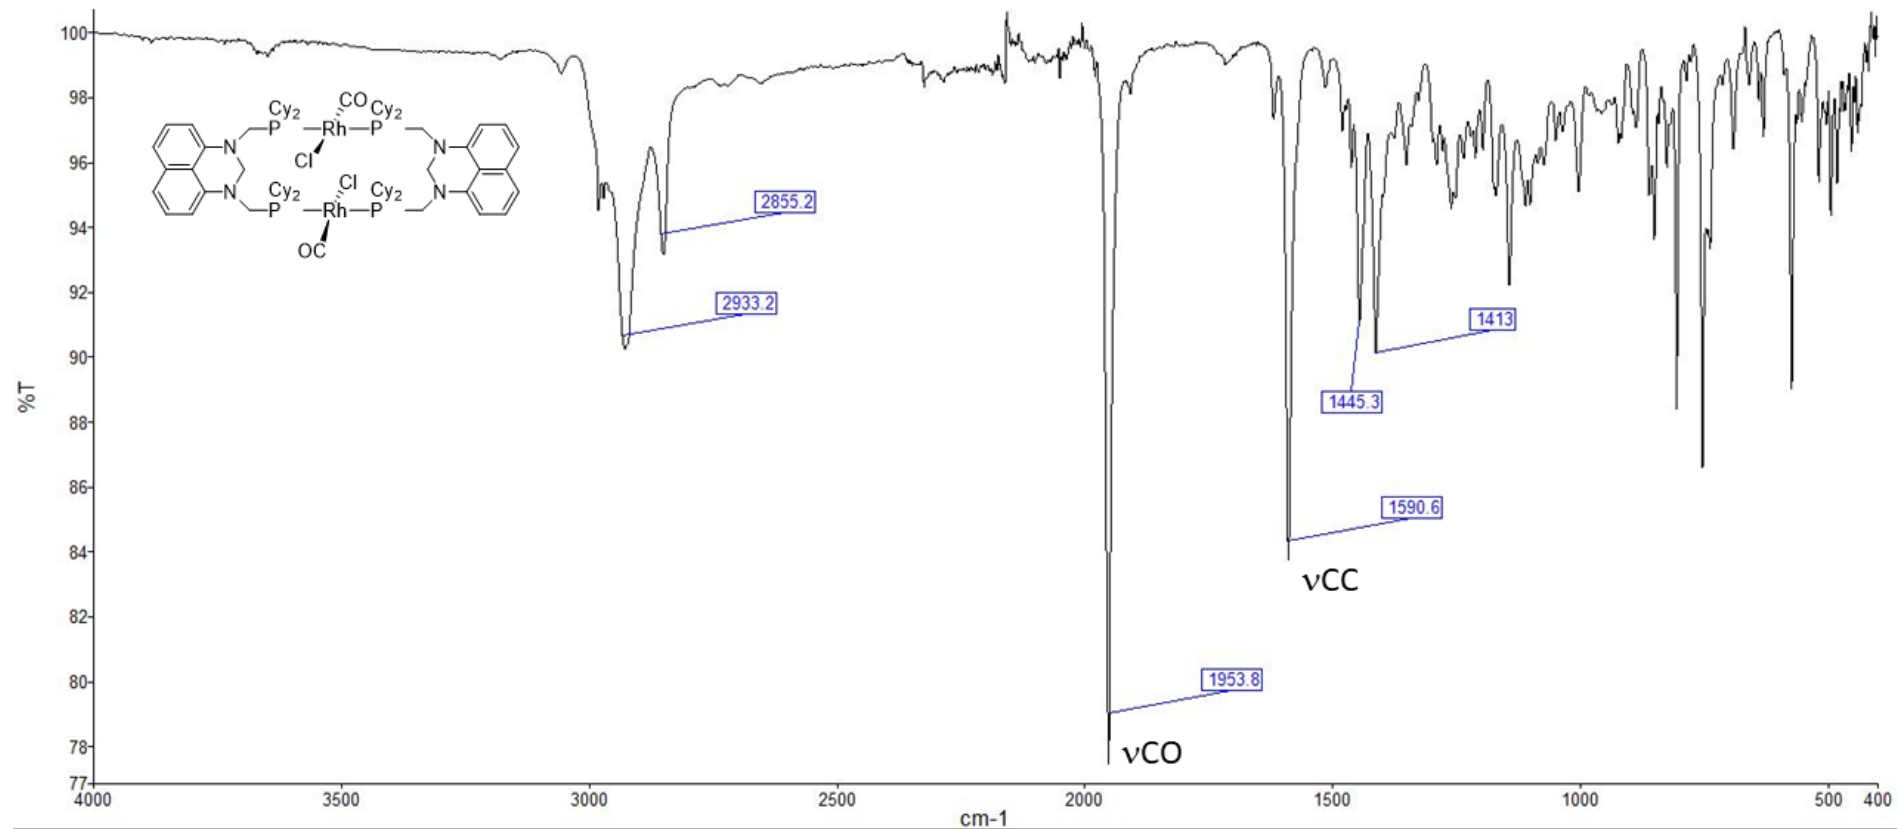

IR (ATR,  $\text{cm}^{-1}$ ) for  $[\text{RhCl}(\text{CO})(\mu\text{-CyH}_2\text{Pm})]_2$  (**2b**).



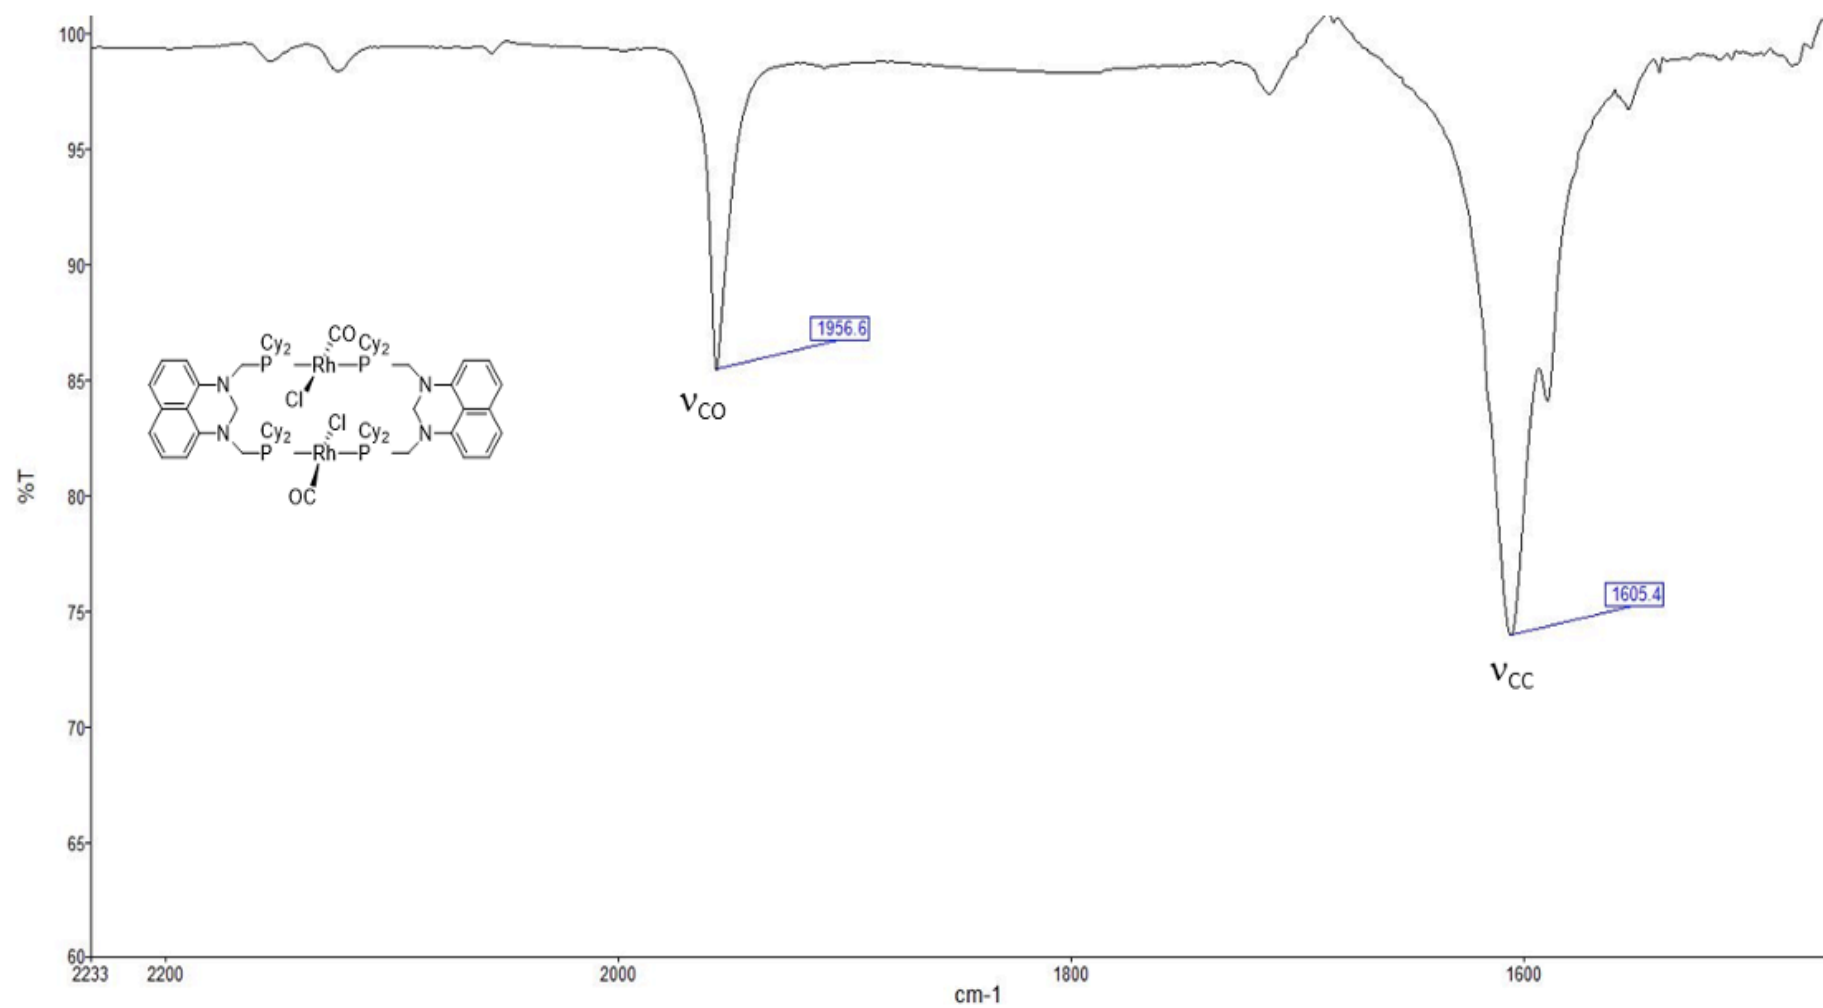

IR ( $\text{CH}_2\text{Cl}_2$ ,  $\text{cm}^{-1}$ ) for  $[\text{RhCl}(\text{CO})(\mu\text{-Cy}_2\text{H}_2\text{Pm})]_2$  (**2b**).

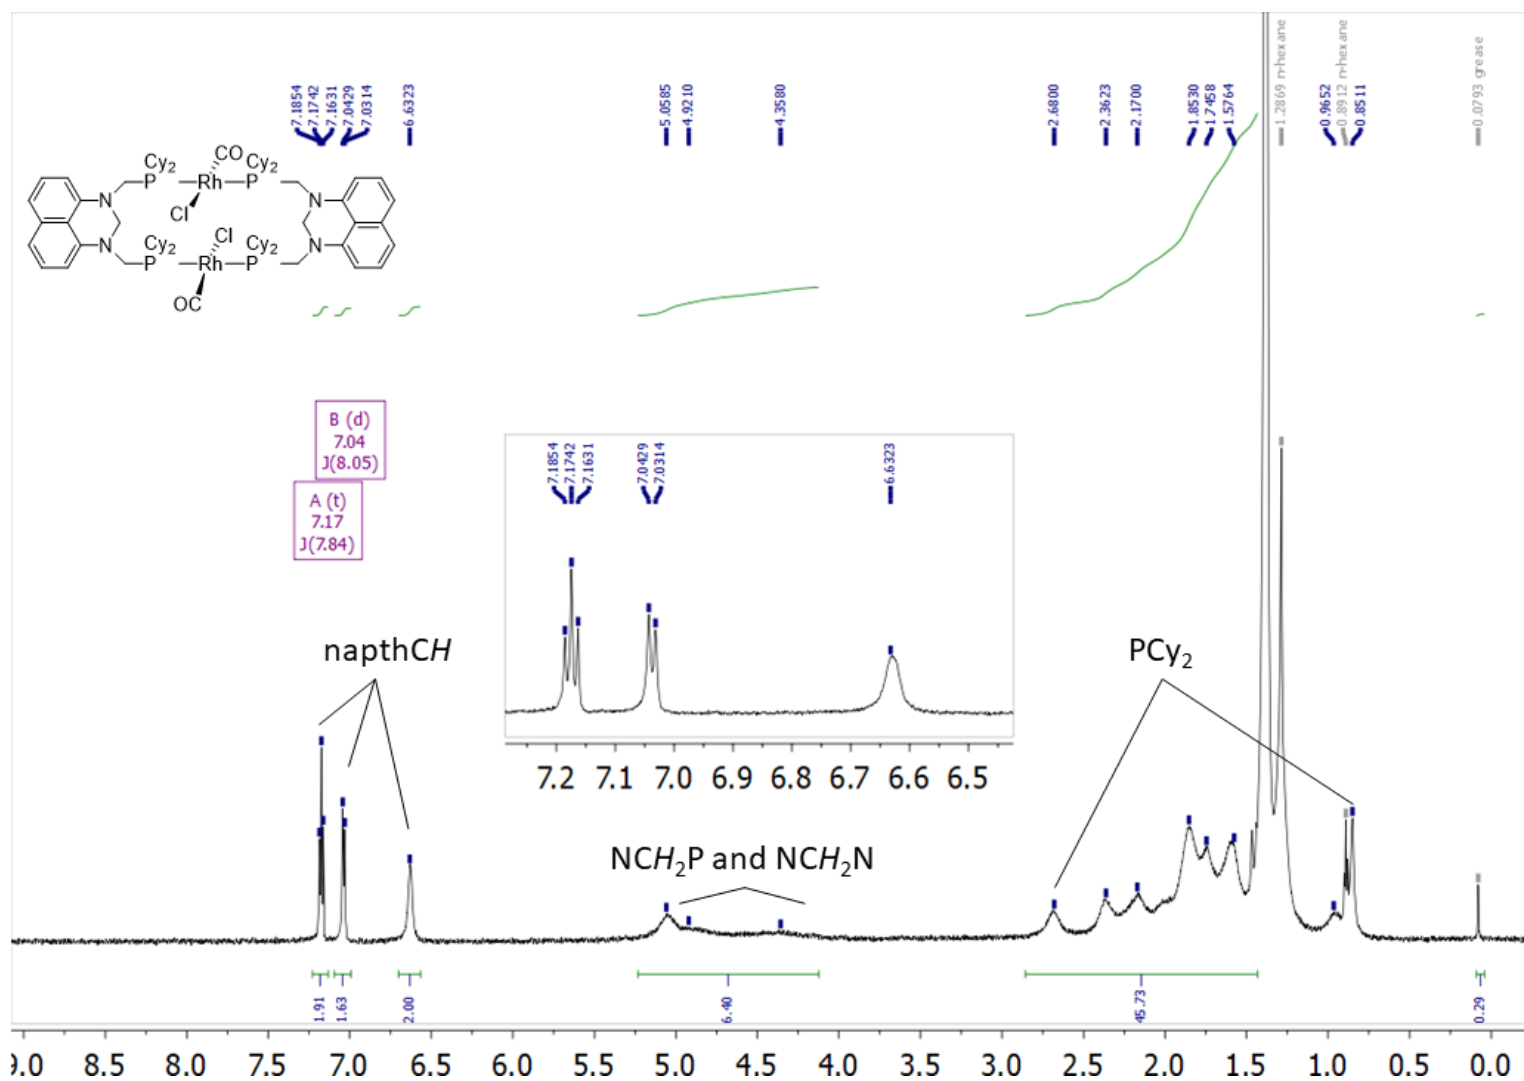

$^1\text{H NMR}$  (700 MHz,  $\text{C}_6\text{D}_{12}$ , 298K) for  $[\text{RhCl}(\text{CO})(\mu\text{-CyH}_2\text{Pm})]_2$  (2b).

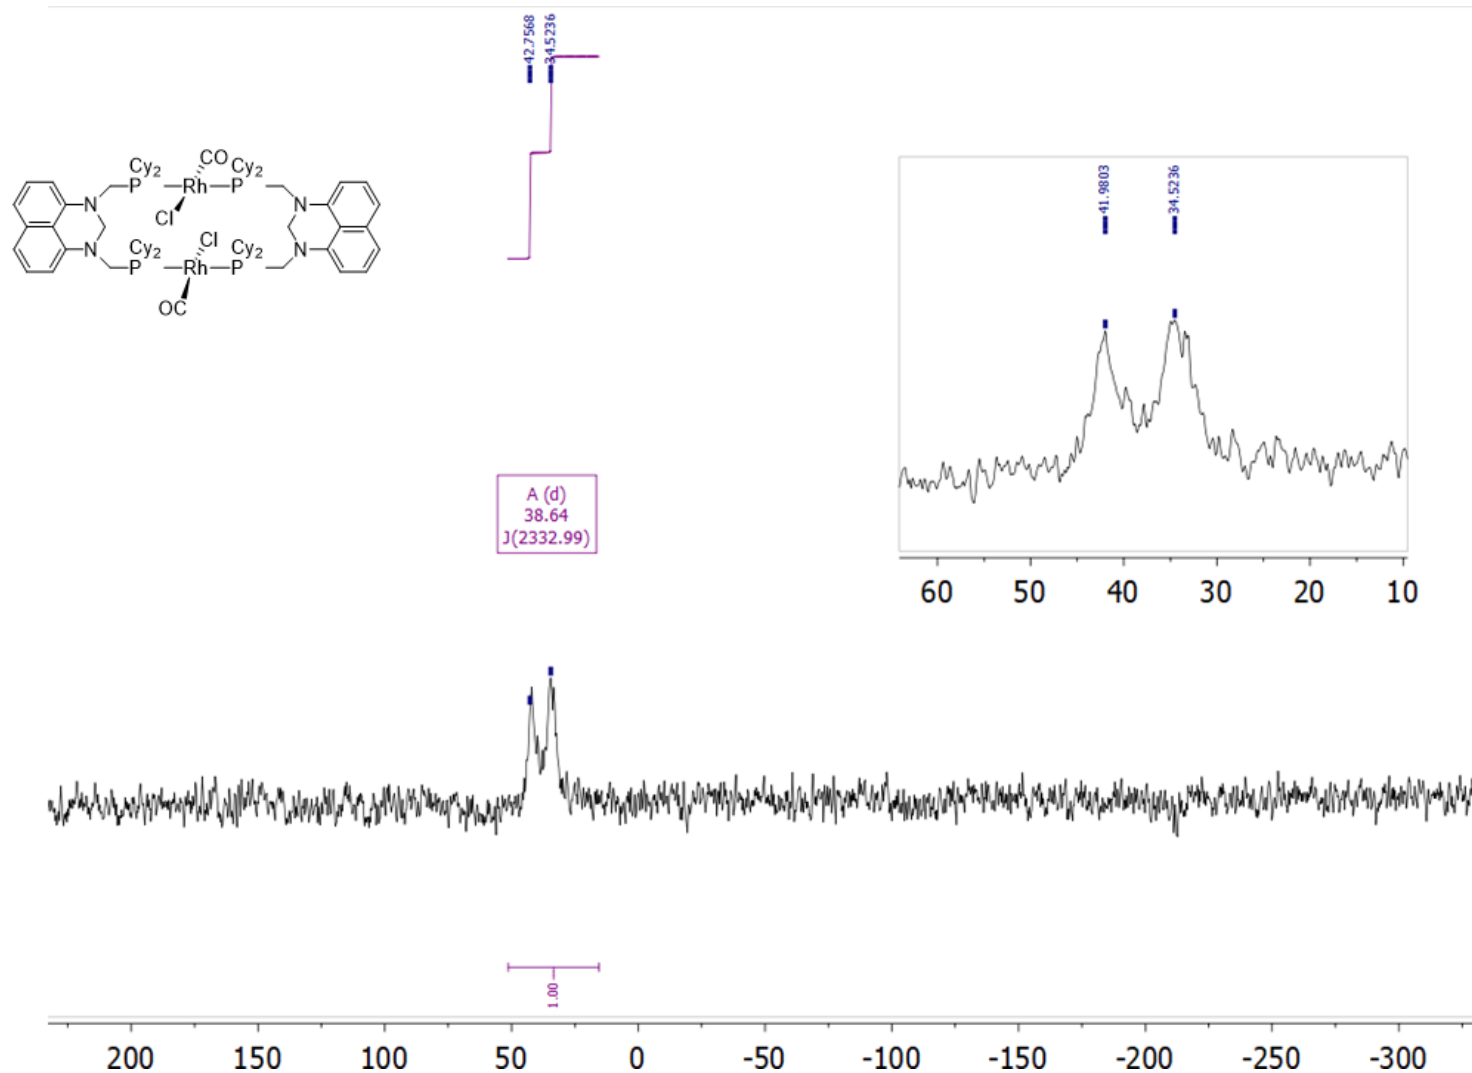

$^{31}\text{P}\{^1\text{H}\}$  NMR (283 MHz,  $\text{C}_6\text{D}_{12}$ , 298 K) for  $[\text{RhCl}(\text{CO})(\mu\text{-CyH}_2\text{Pm})]_2$  (**2b**).

## Single Mass Analysis

Tolerance = 3.0 PPM / DBE: min = -1.5, max = 25.0

Element prediction: Off

Number of isotope peaks used for i-FIT = 3

Monoisotopic Mass, Even Electron Ions

737 formula(e) evaluated with 1 results within limits (up to 50 best isotopic matches for each mass)

Elements Used:

C: 0-80 H: 0-120 N: 1-4 O: 0-2 P: 0-4 35Cl: 0-1 37Cl: 0-1 103Rh: 0-2

LJW-345/AJ

SYNAPTG2-Si#NotSet

03-Feb-2021

66326

13:07:12

65255

0076 42 (0.102) Cm (38:75)

1: TOF MS ES+  
5.14e+005

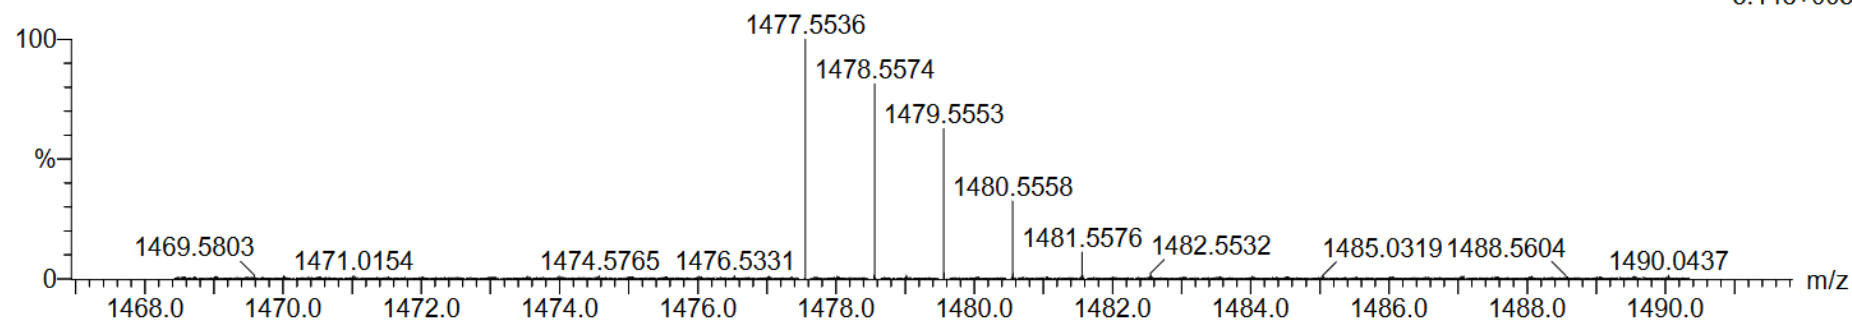

Minimum: -1.5  
Maximum: 5.0 3.0 25.0

| Mass      | Calc. Mass | mDa | PPM | DBE  | i-FIT  | Formula                       |
|-----------|------------|-----|-----|------|--------|-------------------------------|
| 1477.5536 | 1477.5534  | 0.2 | 0.1 | 24.5 | 2707.9 | C76 H112 N4 O2 P4 35Cl 103Rh2 |

MS (ESI, +ve ion) for  $[\text{RhCl}(\text{CO})(\mu\text{-CyH}_2\text{Pm})_2]_2$  (**2b**).

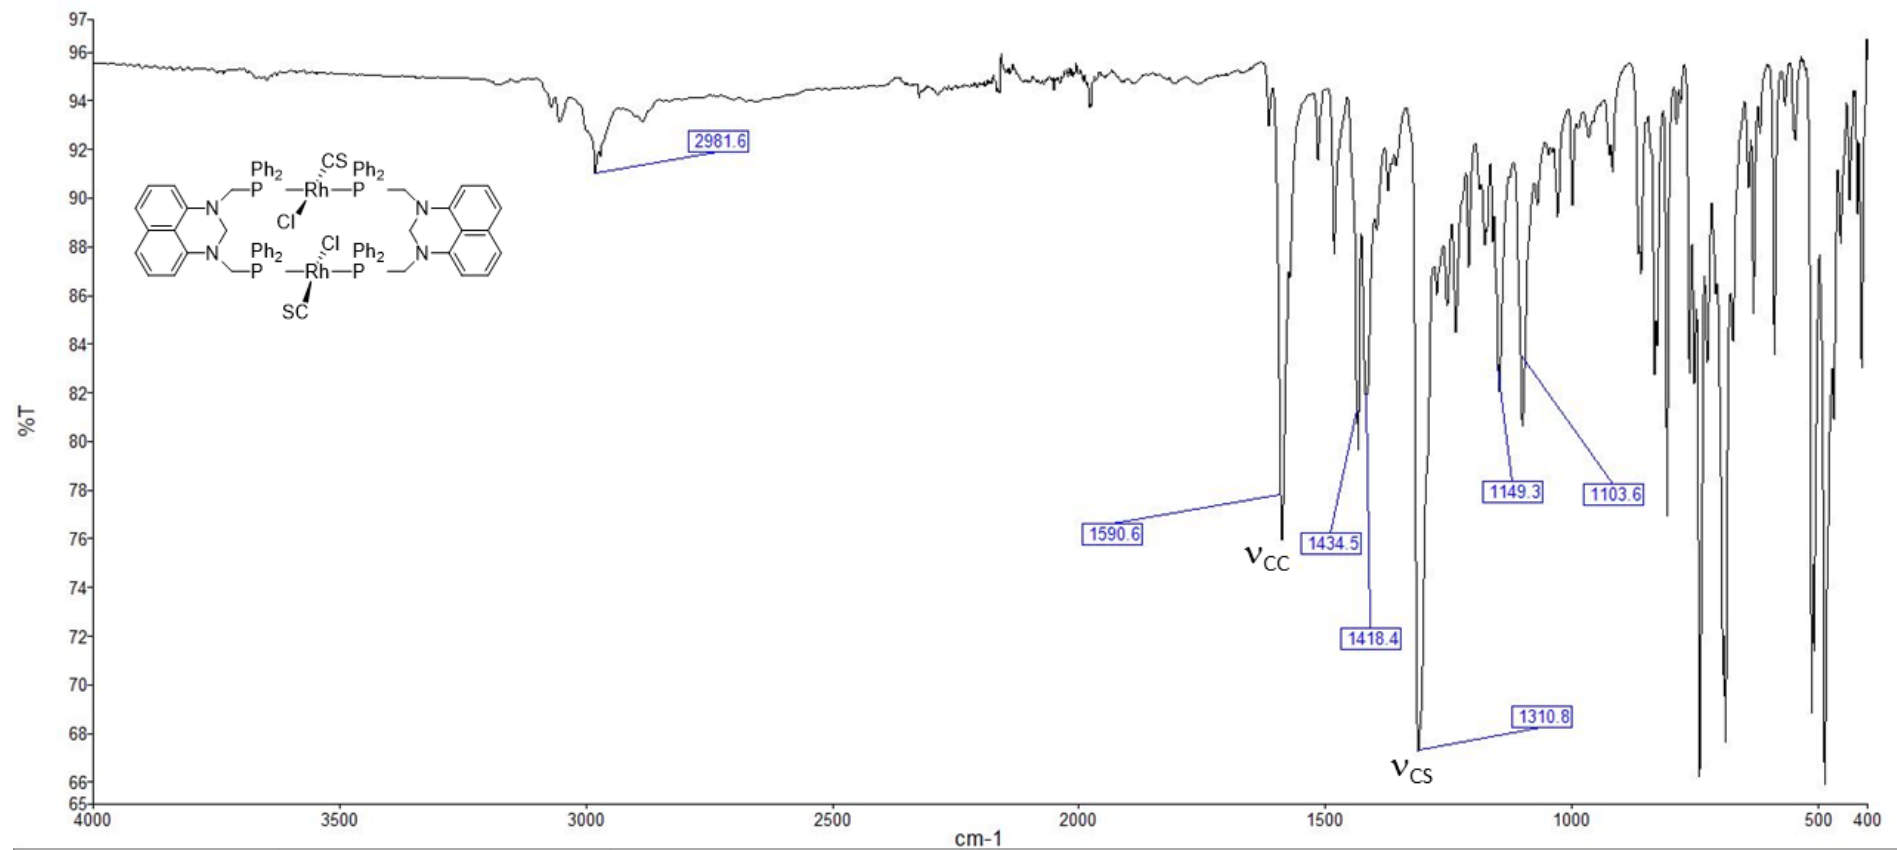IR (ATR,  $\text{cm}^{-1}$ ) for  $[\text{RhCl}(\text{CS})(\mu\text{-PhH}_2\text{Pm})]_2$  (3a).

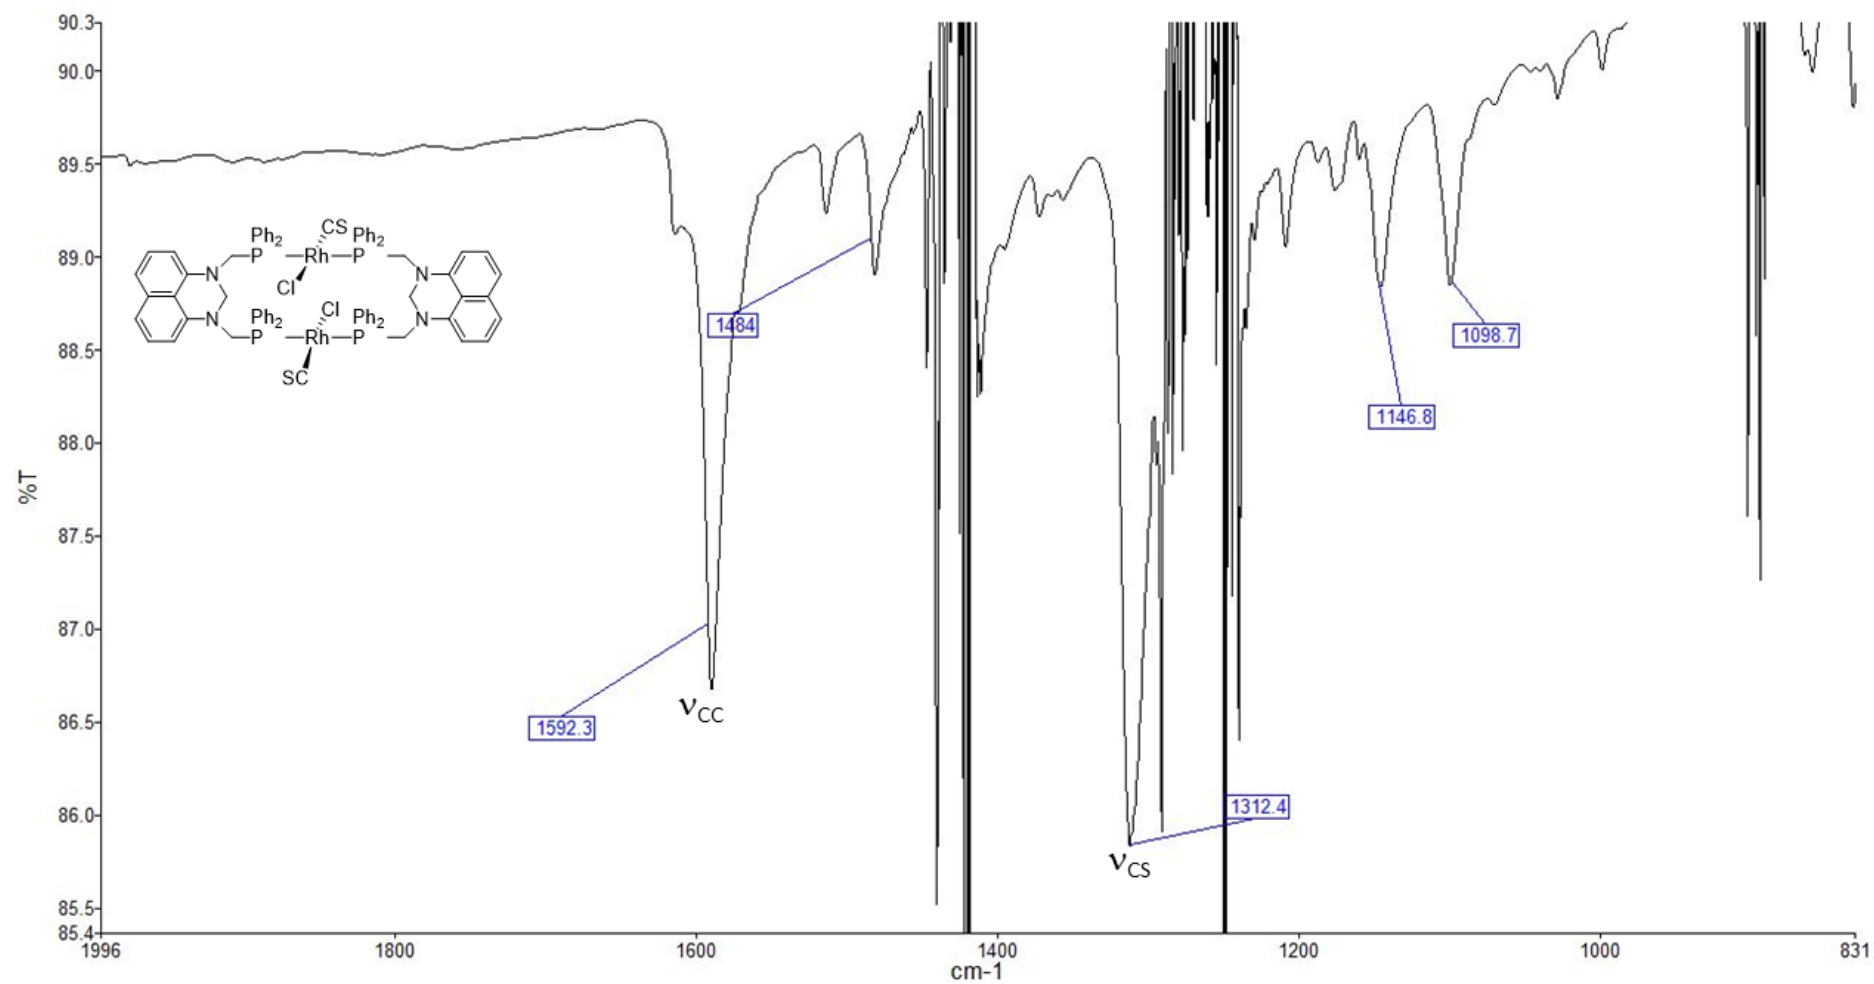

IR ( $\text{CH}_2\text{Cl}_2$ ,  $\text{cm}^{-1}$ ) for  $[\text{RhCl}(\text{CS})(\mu\text{-PhH}_2\text{Pm})]_2$  (**3a**).

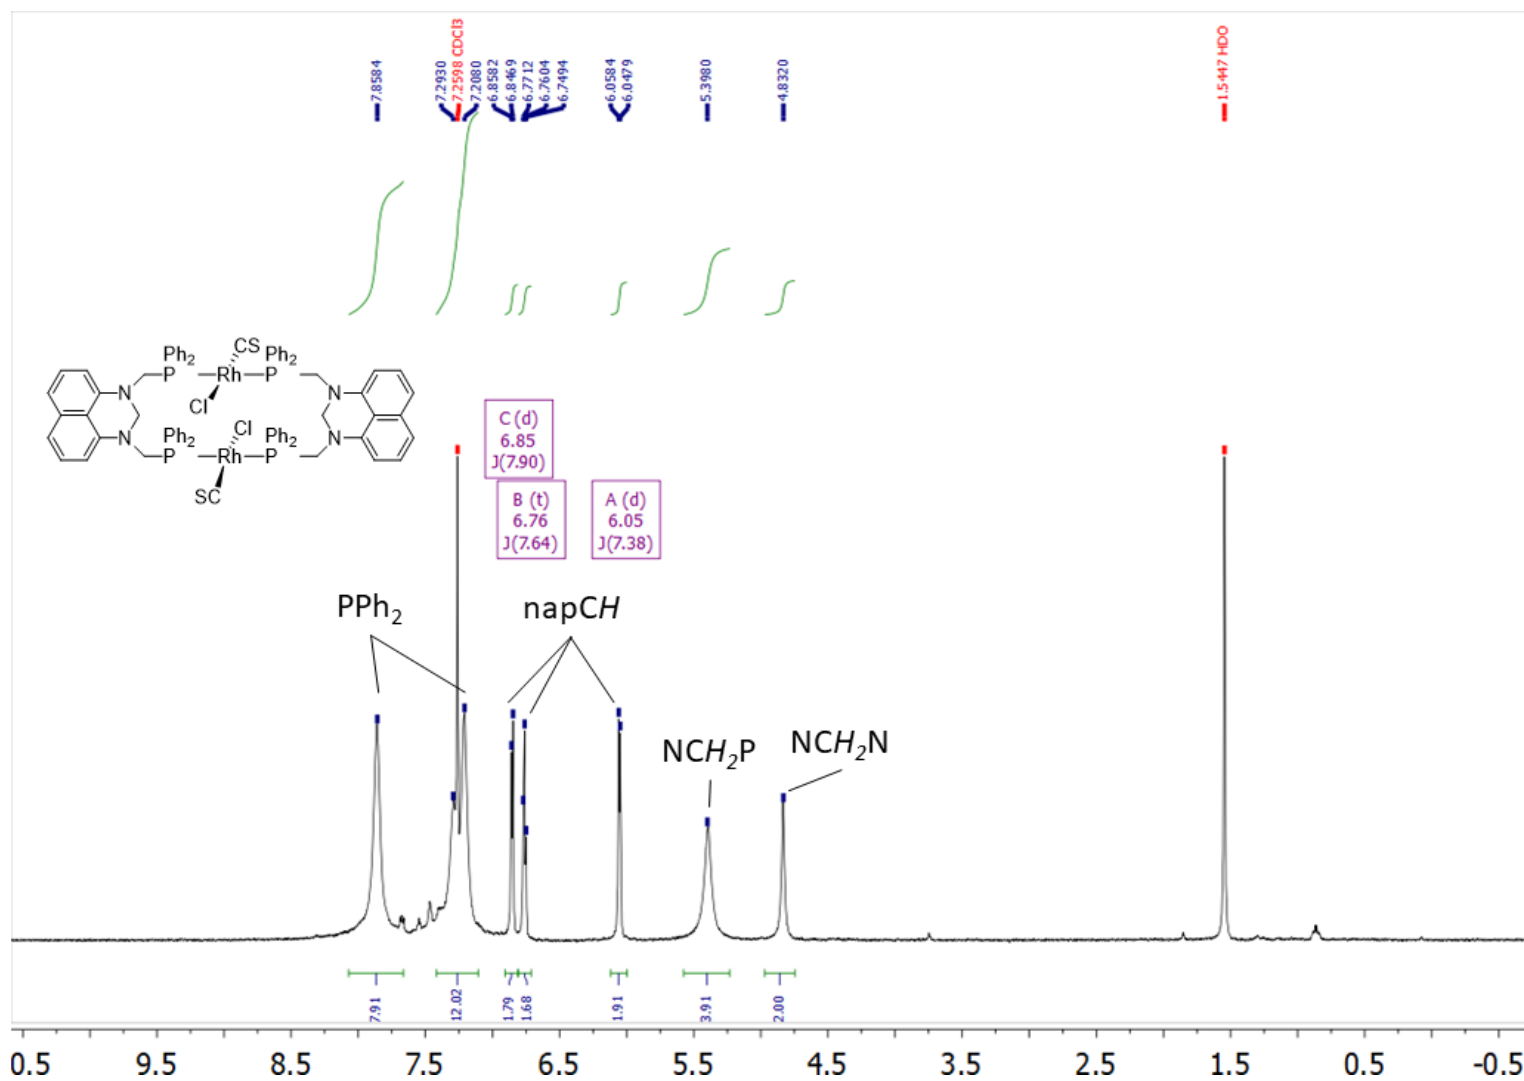

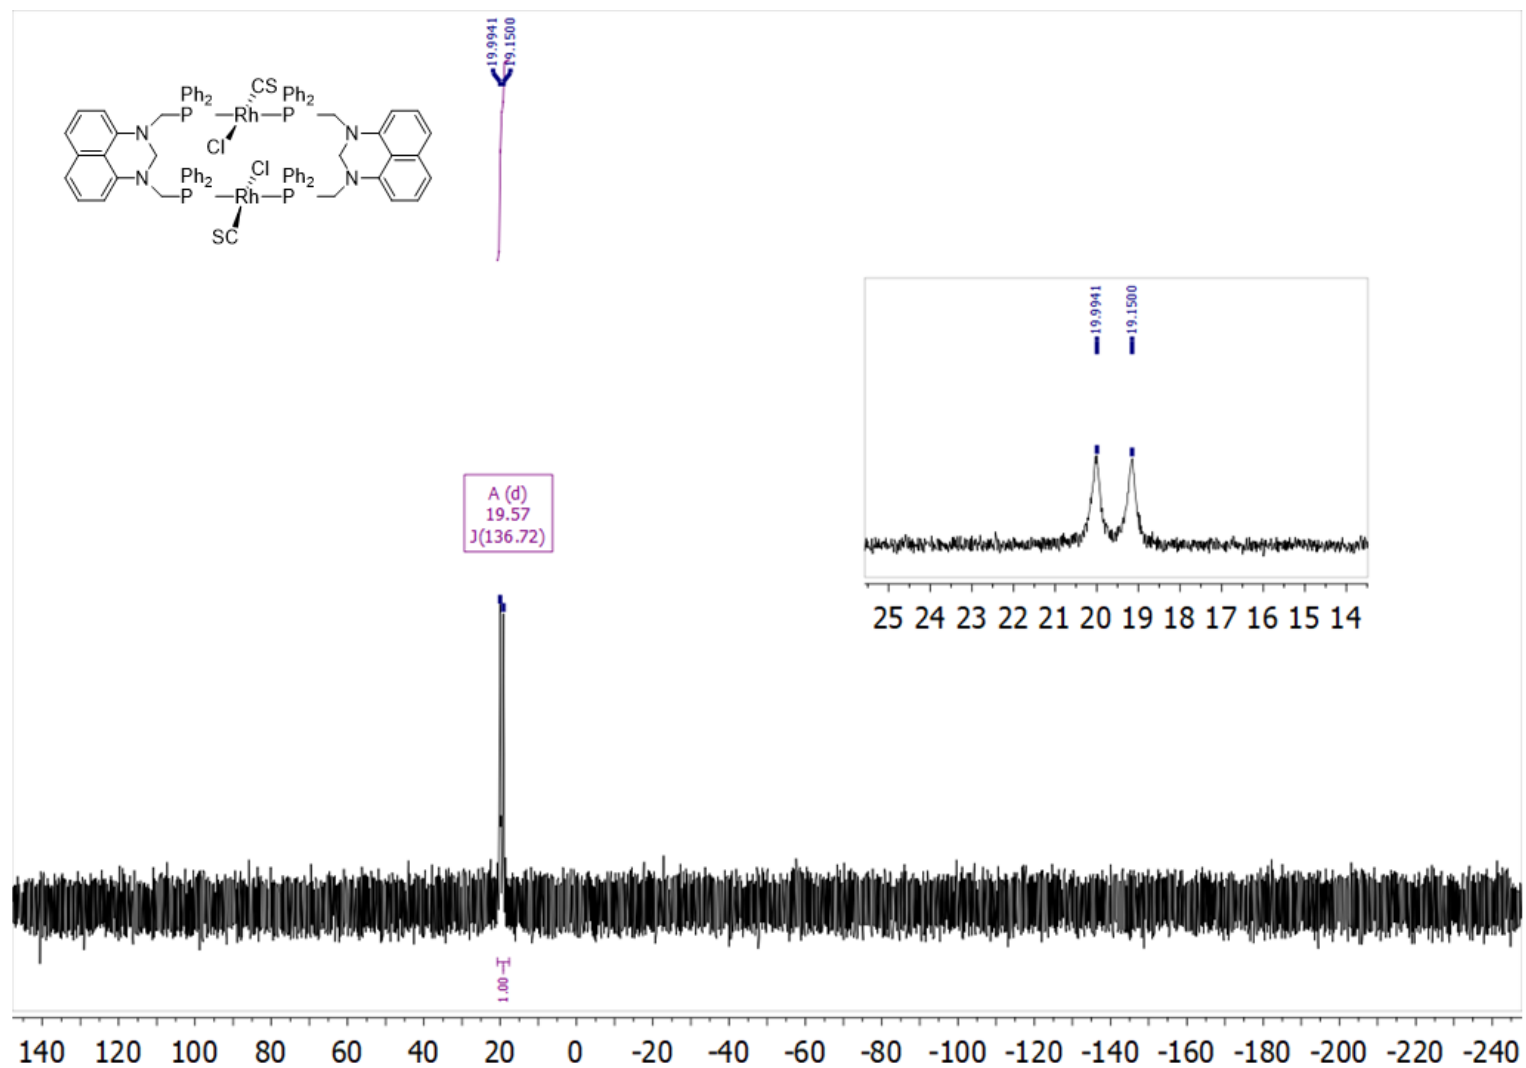

$^{31}\text{P}\{^1\text{H}\}$  NMR (163 MHz,  $\text{CDCl}_3$ , 298 K) for  $[\text{RhCl}(\text{CS})(\mu\text{-PhH}_2\text{Pm})]_2$  (**3a**).



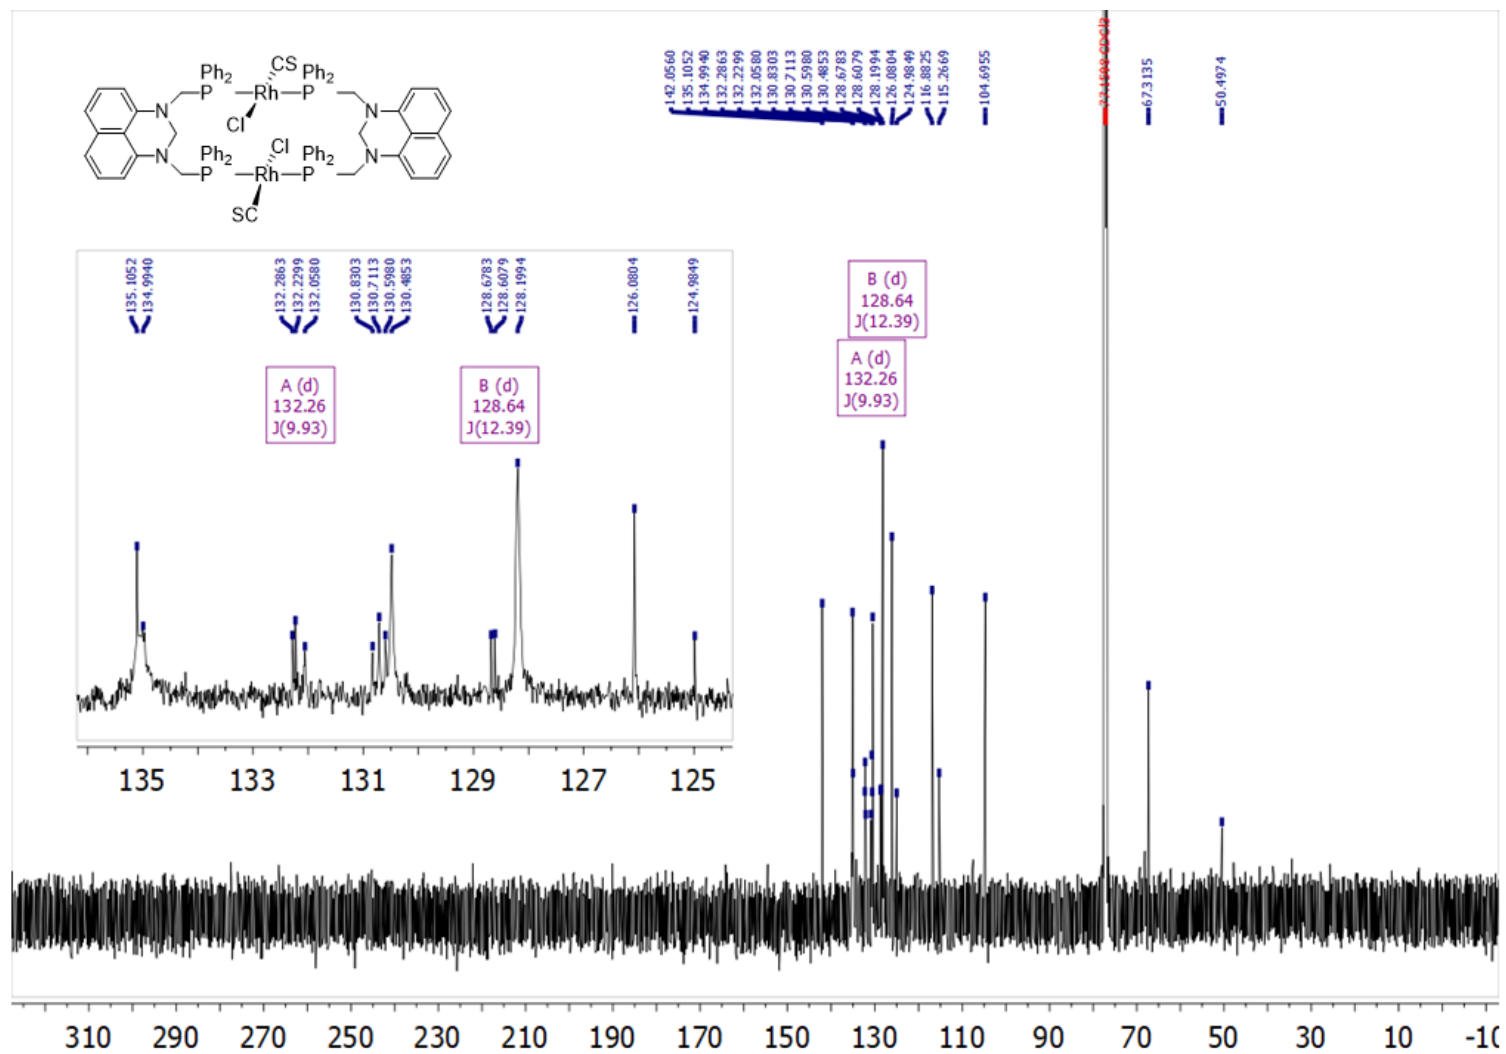

$^{13}\text{C}\{^1\text{H}\}$  NMR (100 MHz,  $\text{CDCl}_3$ , 298 K) for  $[\text{RhCl}(\text{CS})(\mu\text{-PhH}_2\text{Pm})_2]$  (**3a**).

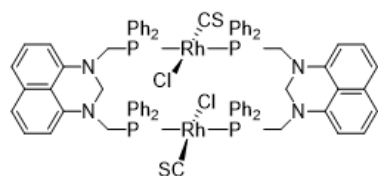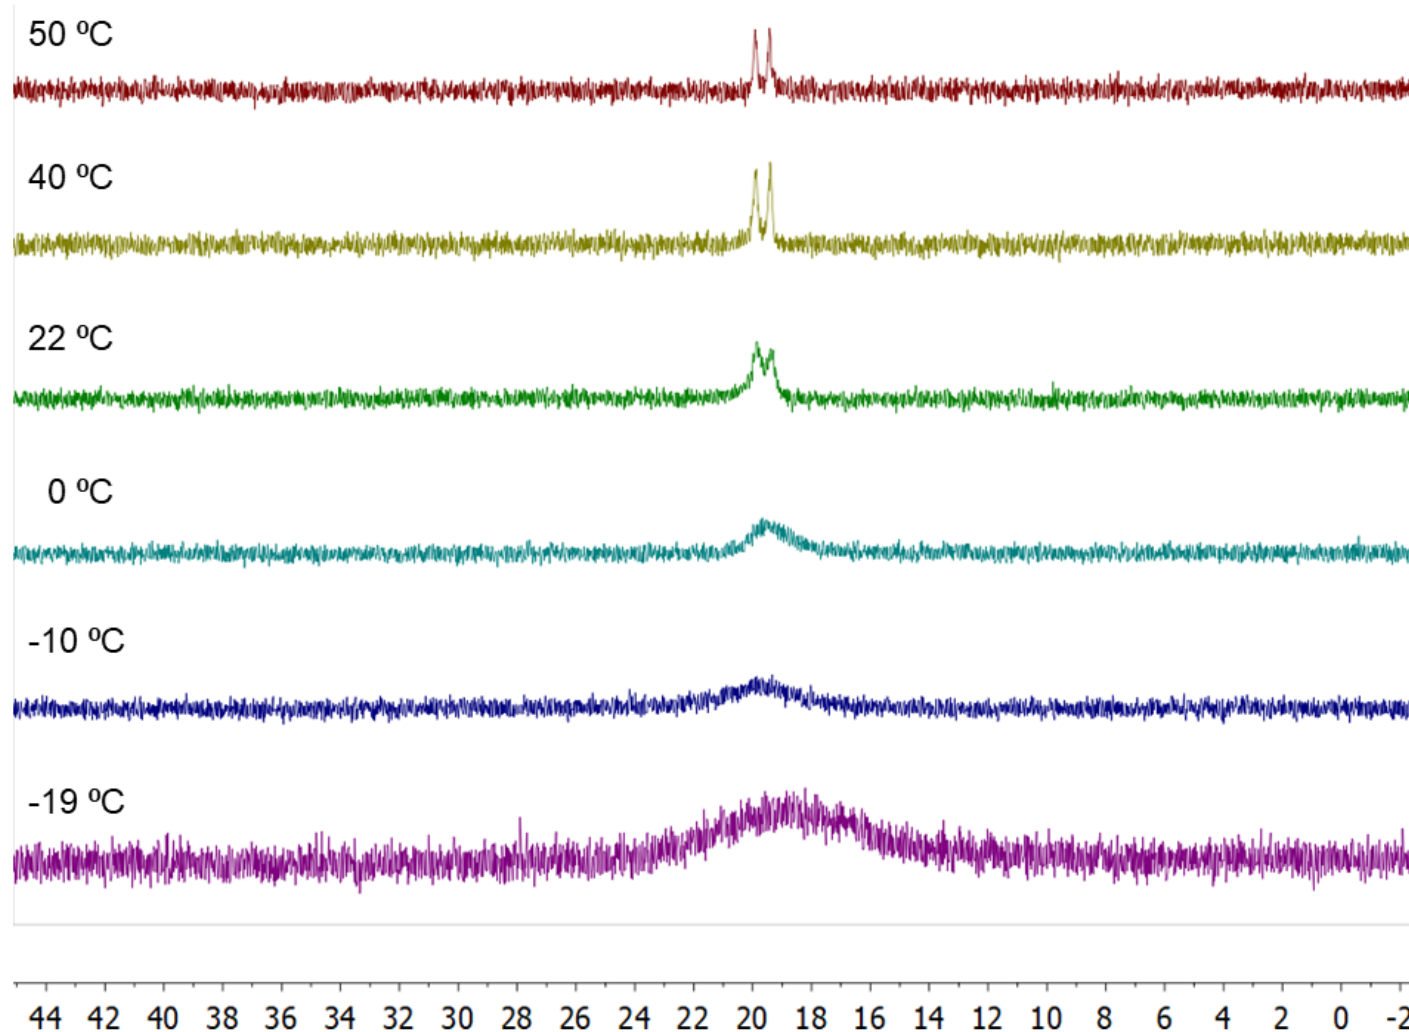

Variable temperature  $^{31}\text{P}\{^1\text{H}\}$  NMR (163 MHz,  $\text{CDCl}_3$ , 298 K) for  $[\text{RhCl}(\text{CS})(\mu\text{-Ph}_2\text{Pm})]_2$  (**3a**).

**Single Mass Analysis**

Tolerance = 3.0 PPM / DBE: min = -1.5, max = 100.0

Element prediction: Off

Number of isotope peaks used for i-FIT = 3

Monoisotopic Mass, Odd and Even Electron Ions

88 formula(e) evaluated with 1 results within limits (up to 50 best isotopic matches for each mass)

Elements Used:

C: 0-40 H: 0-60 11B: 0-1 N: 0-2 P: 0-2 S: 0-1 Rh: 0-1

LJW-340

27-Jan-2021

14:53:54

66296

0047 97 (0.213) Cm (95:122)

SYNAPT G2-Si#NotSet

1: TOF MS ES+

1.11e+007

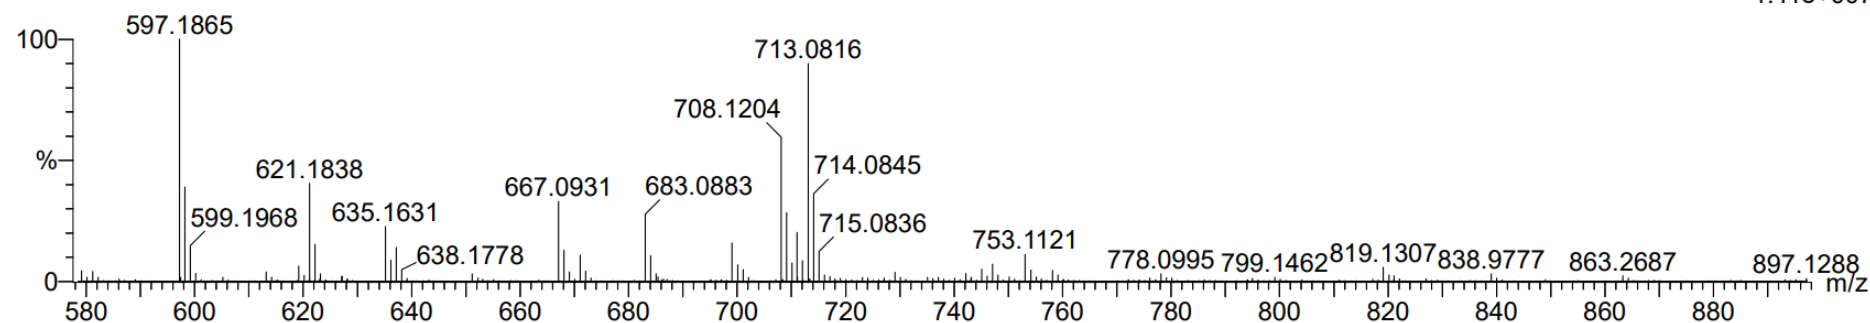

Minimum: -1.5  
 Maximum: 5.0 3.0 100.0

| Mass     | Calc. Mass | mDa | PPM | DBE  | i-FIT  | Norm | Conf (%) | Formula            |
|----------|------------|-----|-----|------|--------|------|----------|--------------------|
| 713.0816 | 713.0816   | 0.0 | 0.0 | 25.0 | 2876.5 | n/a  | n/a      | C38 H32 N2 P2 S Rh |

MS (ESI, +ve ion) for  $[\text{RhCl}(\text{CS})(\mu\text{-PhH}_2\text{Pm})_2]$  (**3a**).

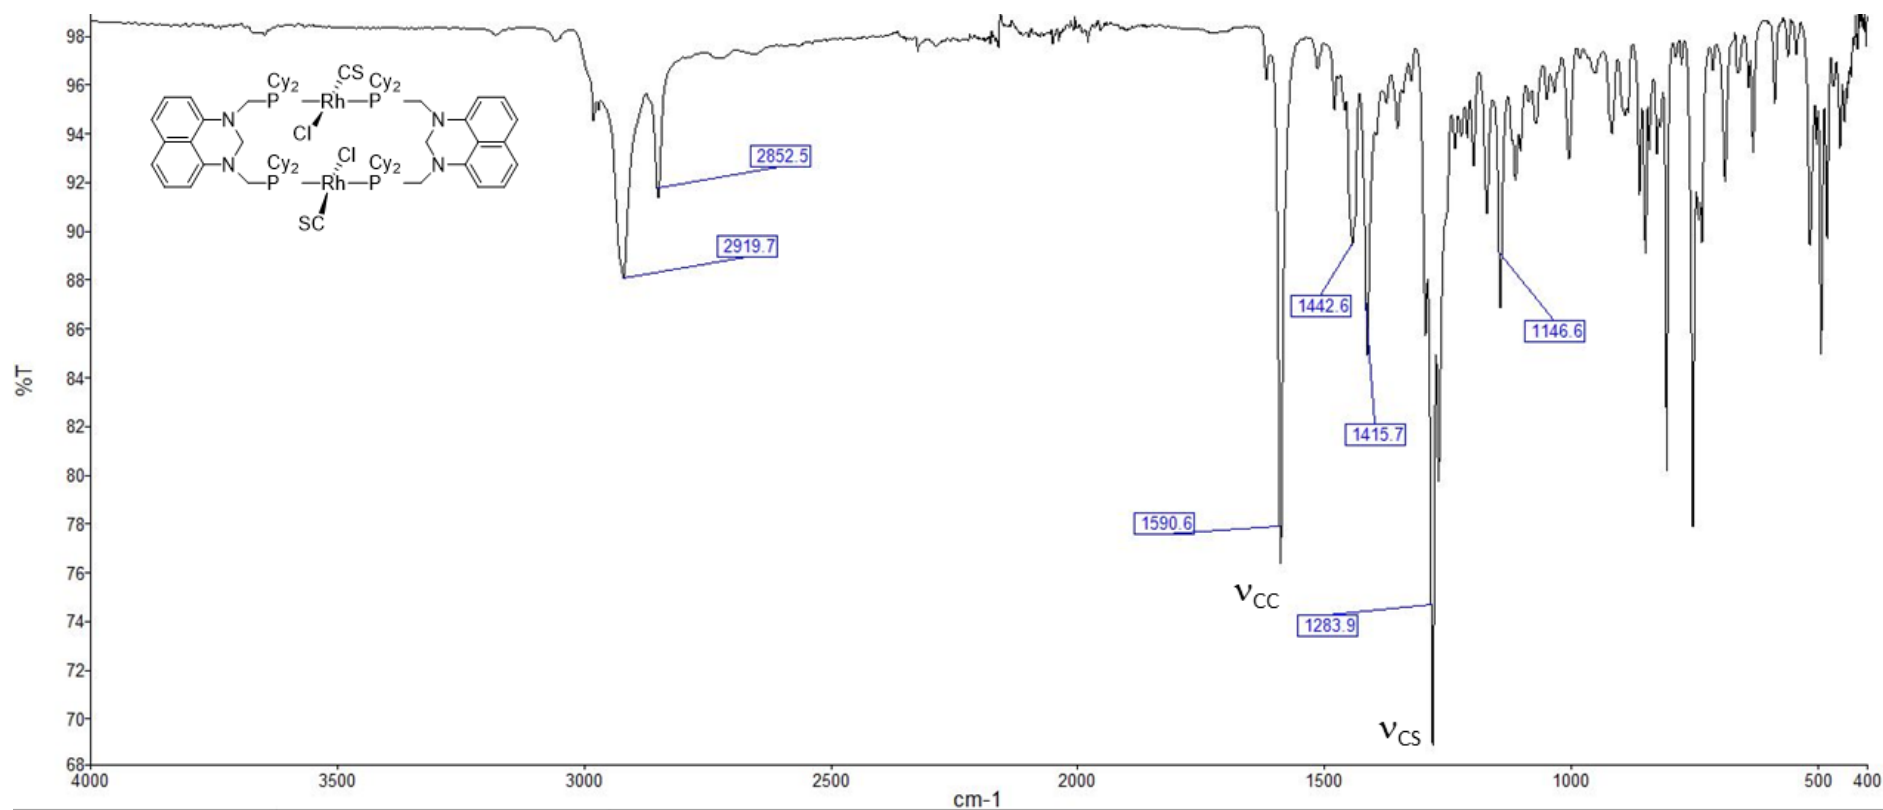IR (ATR,  $\text{cm}^{-1}$ ) for  $[\text{RhCl}(\text{CS})(\mu\text{-CyH}_2\text{Pm})]_2$  (**3b**).

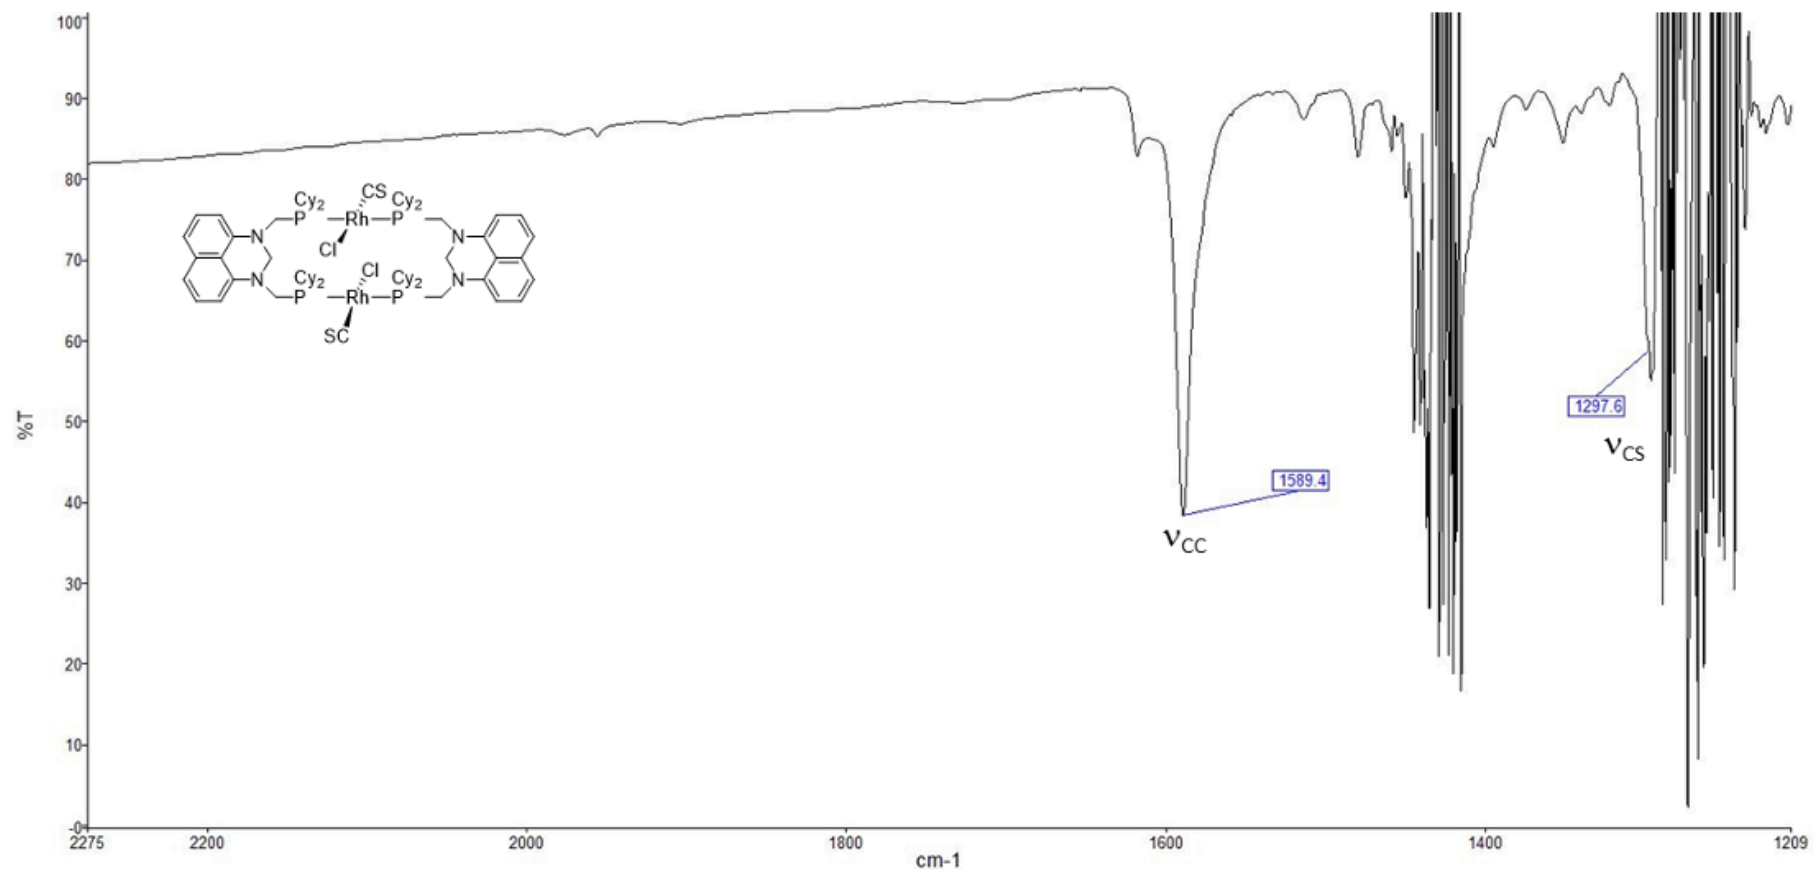

IR ( $\text{CH}_2\text{Cl}_2$ ,  $\text{cm}^{-1}$ ) for  $[\text{RhCl}(\text{CS})(\mu\text{-CyH}_2\text{Pm})]_2$  (**3b**).

**Single Mass Analysis**

Tolerance = 3.0 PPM / DBE: min = -1.5, max = 100.0

Element prediction: Off

Number of isotope peaks used for i-FIT = 3

Monoisotopic Mass, Even Electron Ions

715 formula(e) evaluated with 1 results within limits (up to 50 best isotopic matches for each mass)

Elements Used:

C: 0-80 H: 0-120 N: 1-4 S: 0-2 P: 0-4 35Cl: 0-1 37Cl: 0-1 103Rh: 0-2

LJW-344/AJ

SYNAPT G2-Si#NotSet

03-Feb-2021

66325

13:03:32

65254

0075 65 (0.149) Cm (62:86)

1: TOF MS ES+  
1.85e+006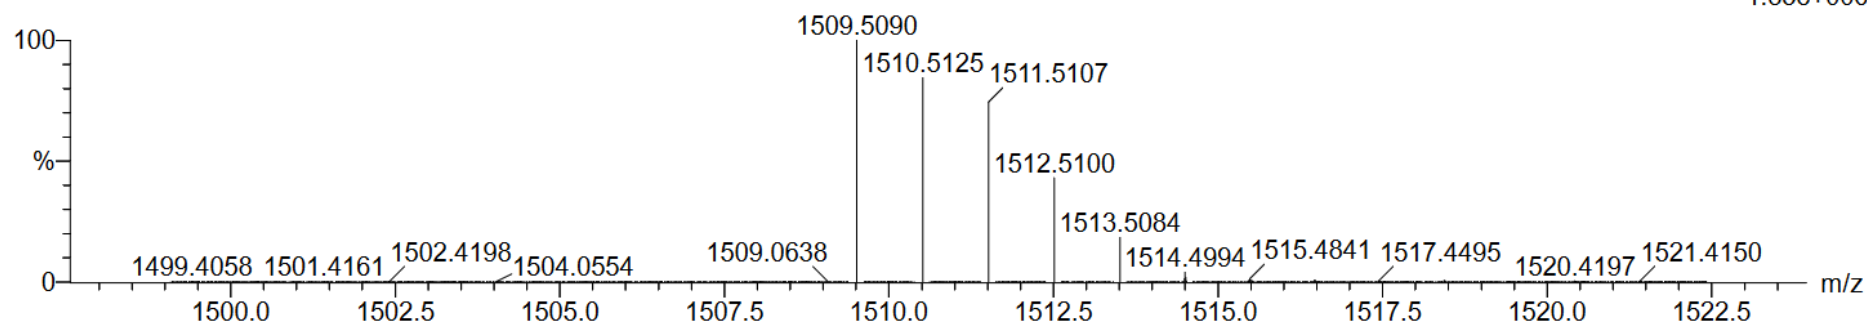

Minimum: -1.5  
 Maximum: 5.0 3.0 100.0

| Mass      | Calc. Mass | mDa | PPM | DBE  | i-FIT  | Formula                       |
|-----------|------------|-----|-----|------|--------|-------------------------------|
| 1509.5090 | 1509.5077  | 1.3 | 0.9 | 24.5 | 2300.0 | C76 H112 N4 S2 P4 35Cl 103Rh2 |

MS (ESI, +ve ion) for  $[\text{RhCl}(\text{CS})(\mu\text{-CyH}_2\text{Pm})_2]$  (**3b**).

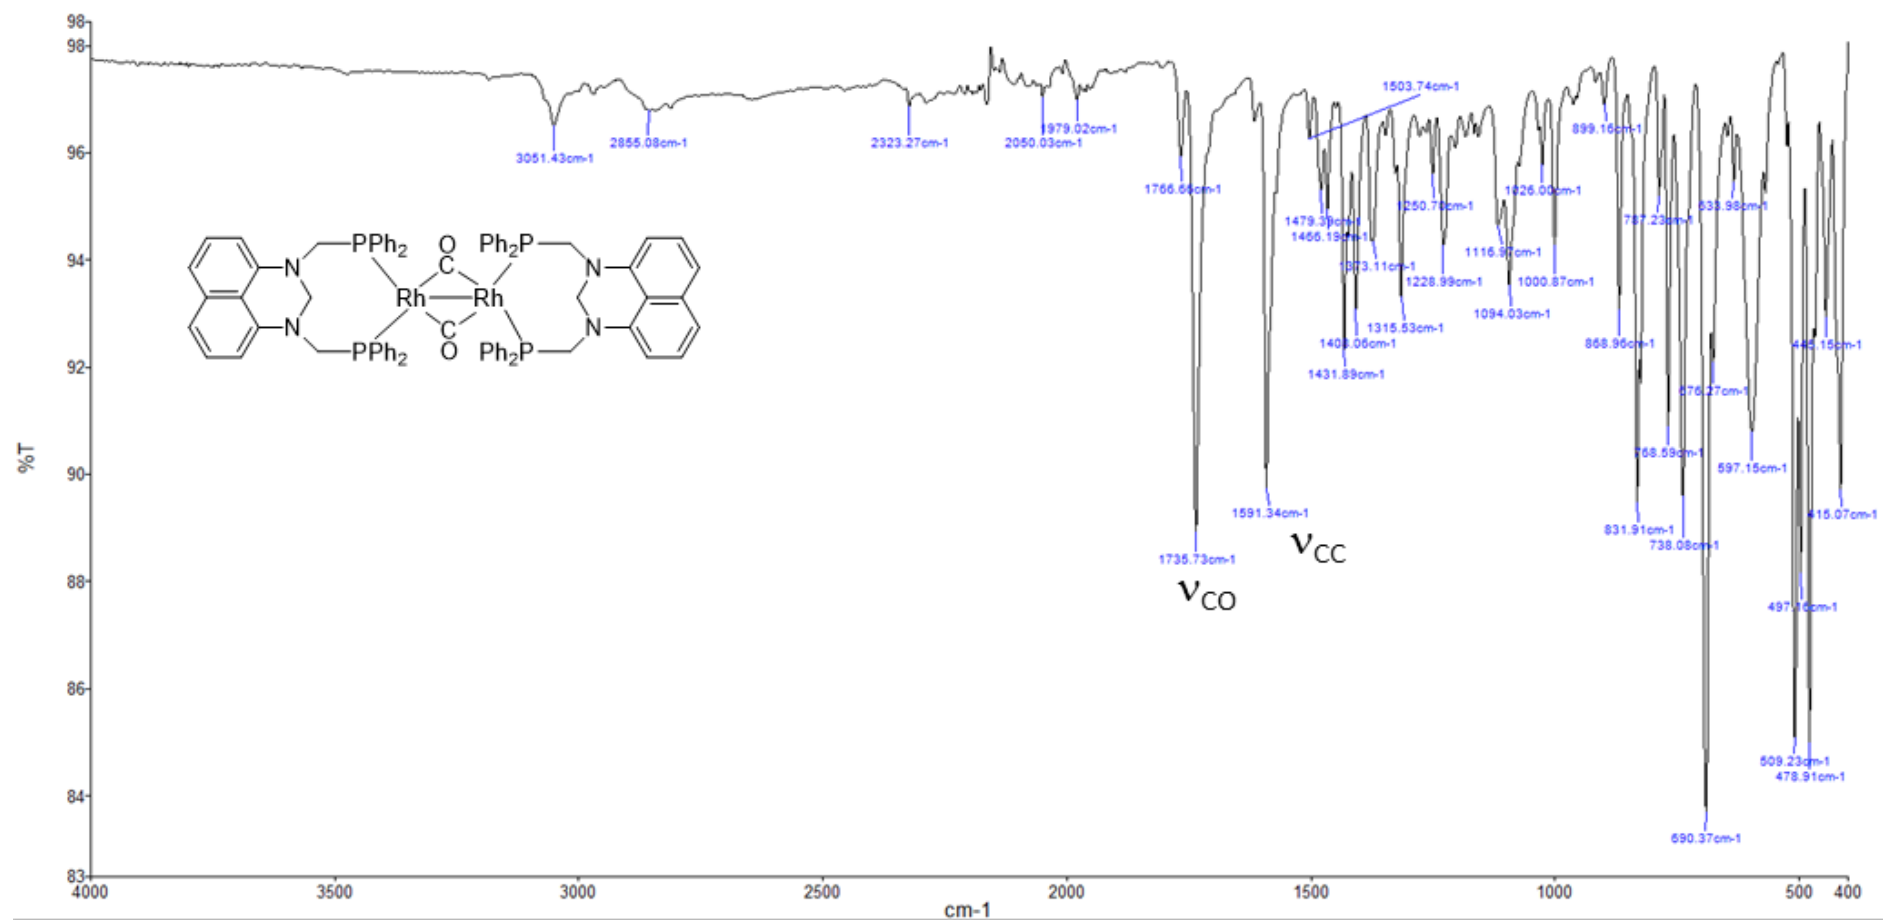IR (ATR,  $\text{cm}^{-1}$ ) for  $[\text{Rh}_2(\mu\text{-CO})_2(\text{Ph}_2\text{Pm})_2]$  (4).

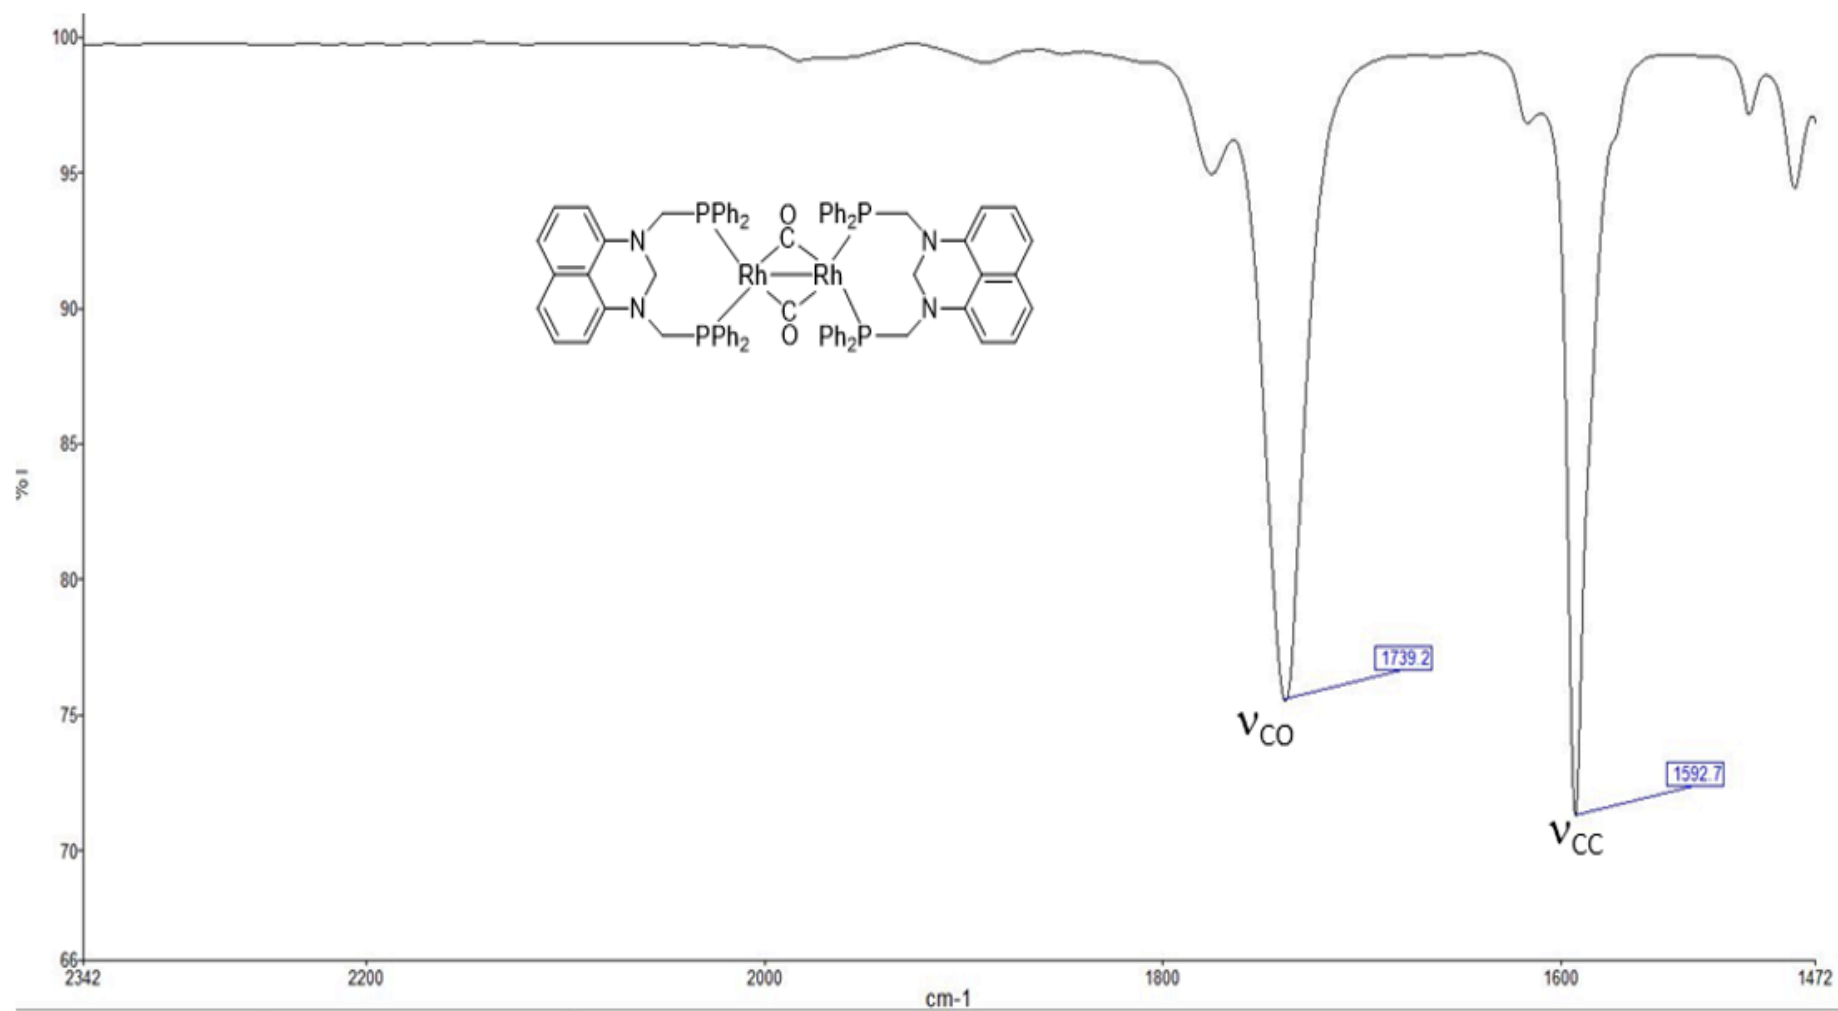

IR (THF,  $\text{cm}^{-1}$ ) for  $[\text{Rh}_2(\mu\text{-CO})_2(\text{PhH}_2\text{Pm})_2]$  (4).



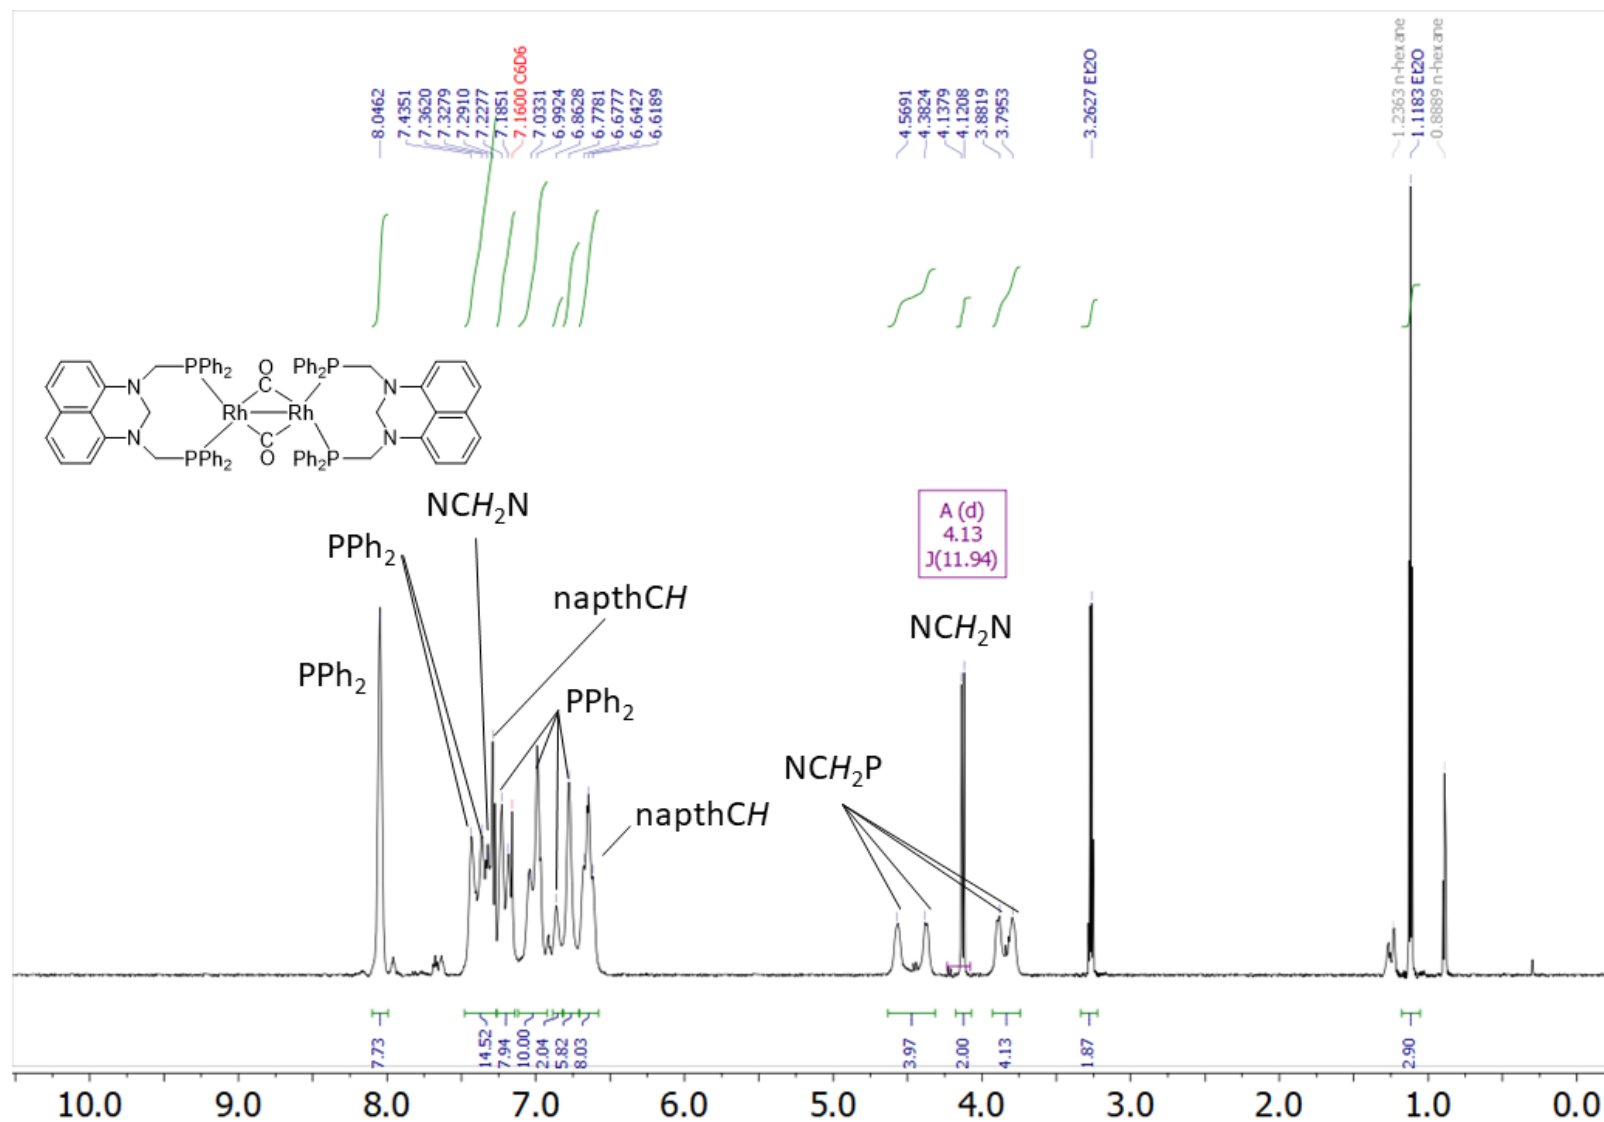

$^1\text{H}$  NMR (700 MHz,  $\text{C}_6\text{D}_6$ , 298 K) for  $[\text{Rh}_2(\mu\text{-CO})_2(\text{Ph}_2\text{Pm})_2]$  (4).

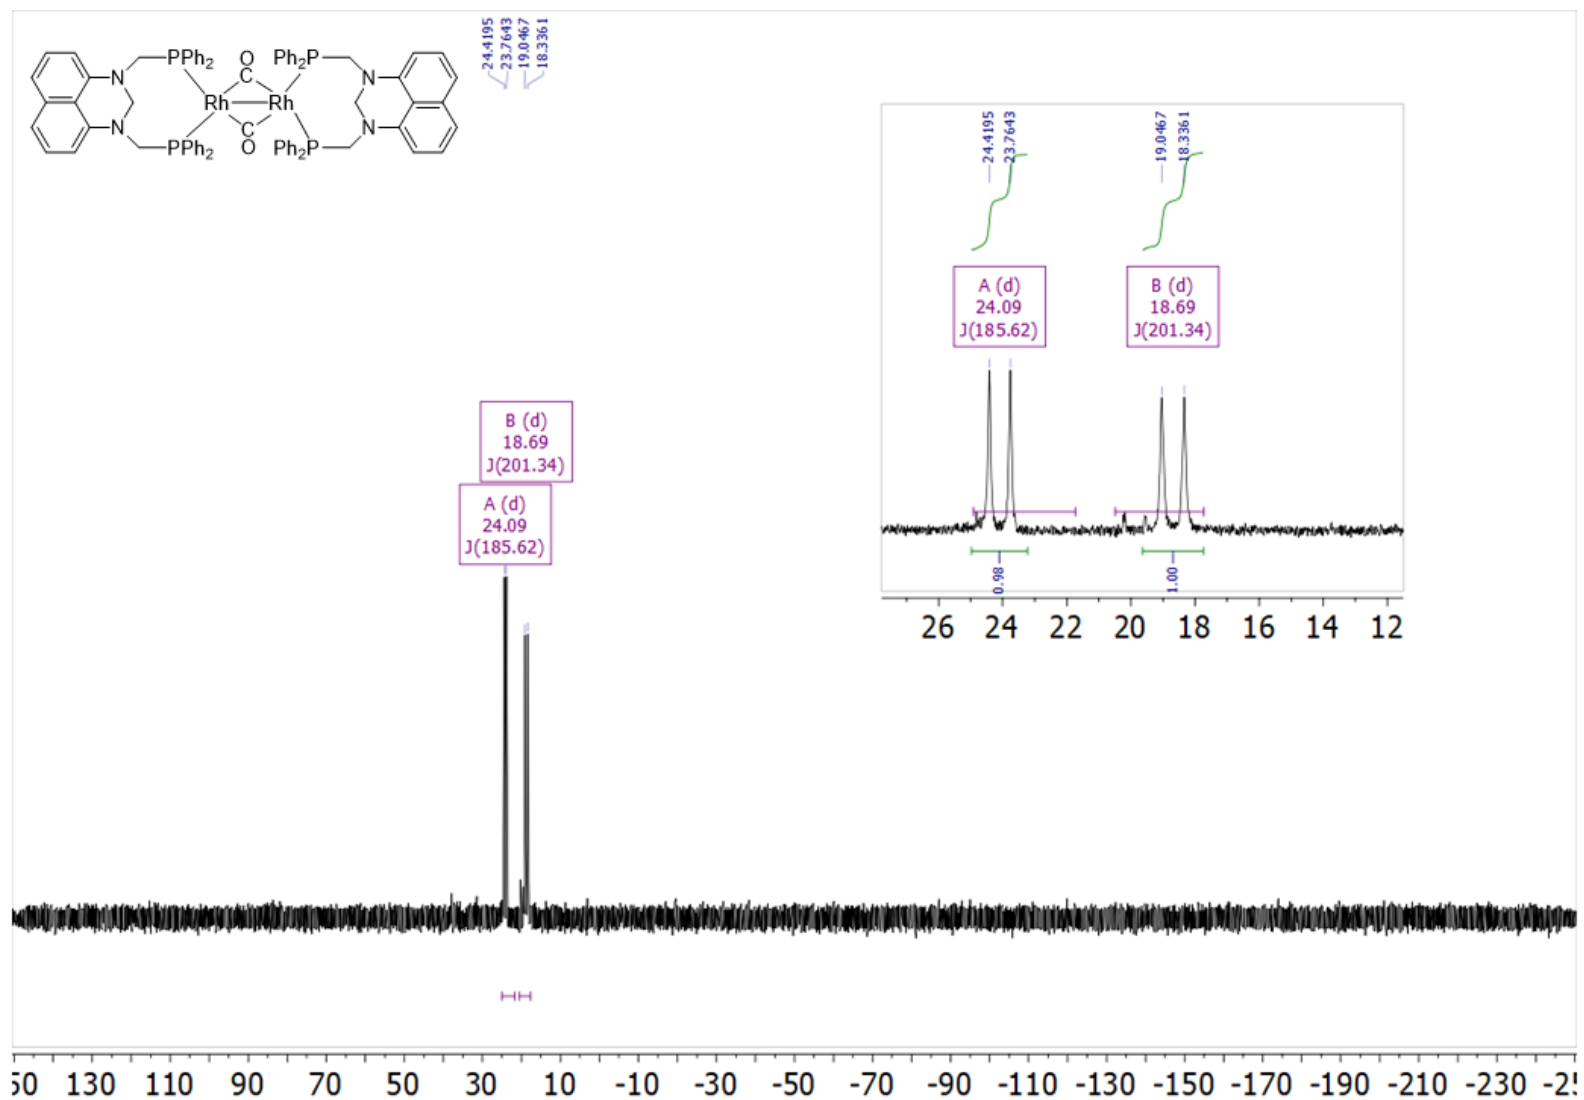

$^{31}\text{P}\{^1\text{H}\}$  NMR (283 MHz,  $\text{C}_6\text{D}_6$ , 298 K) for  $[\text{Rh}_2(\mu\text{-CO})_2(\text{Ph}_2\text{Pm})_2]$  (4).

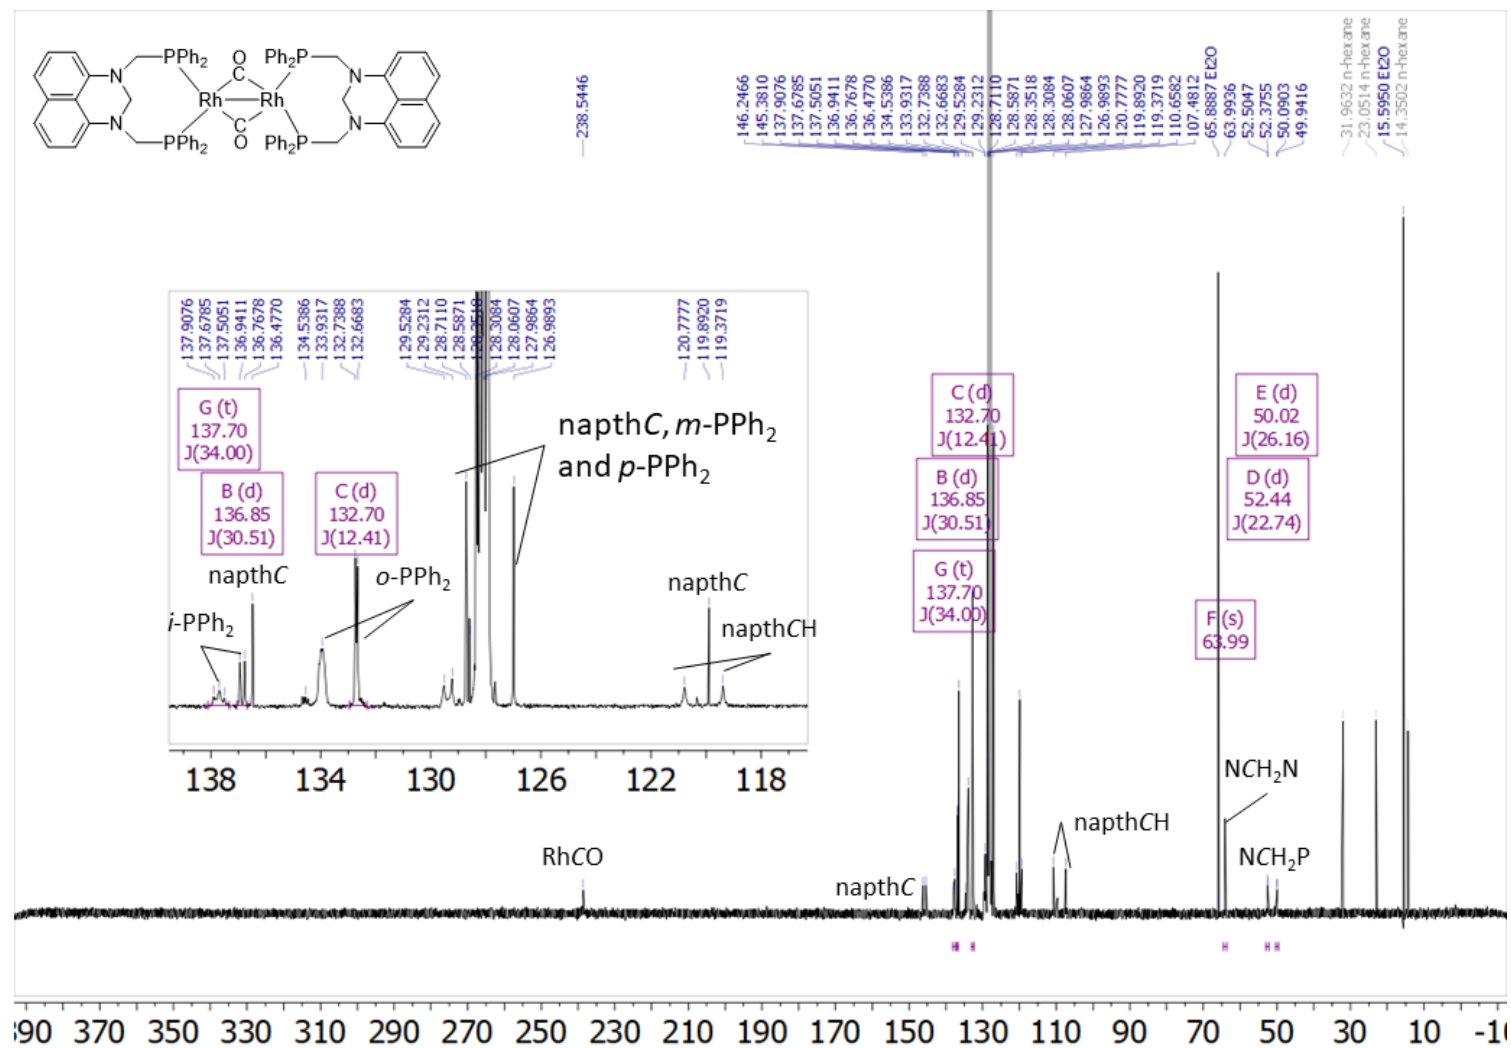

$^{13}\text{C}\{^1\text{H}\}$  NMR (176 MHz,  $\text{C}_6\text{D}_6$ , 298 K) for  $[\text{Rh}_2(\mu\text{-CO})_2(\text{PhH}_2\text{Pm})_2]$  (4).

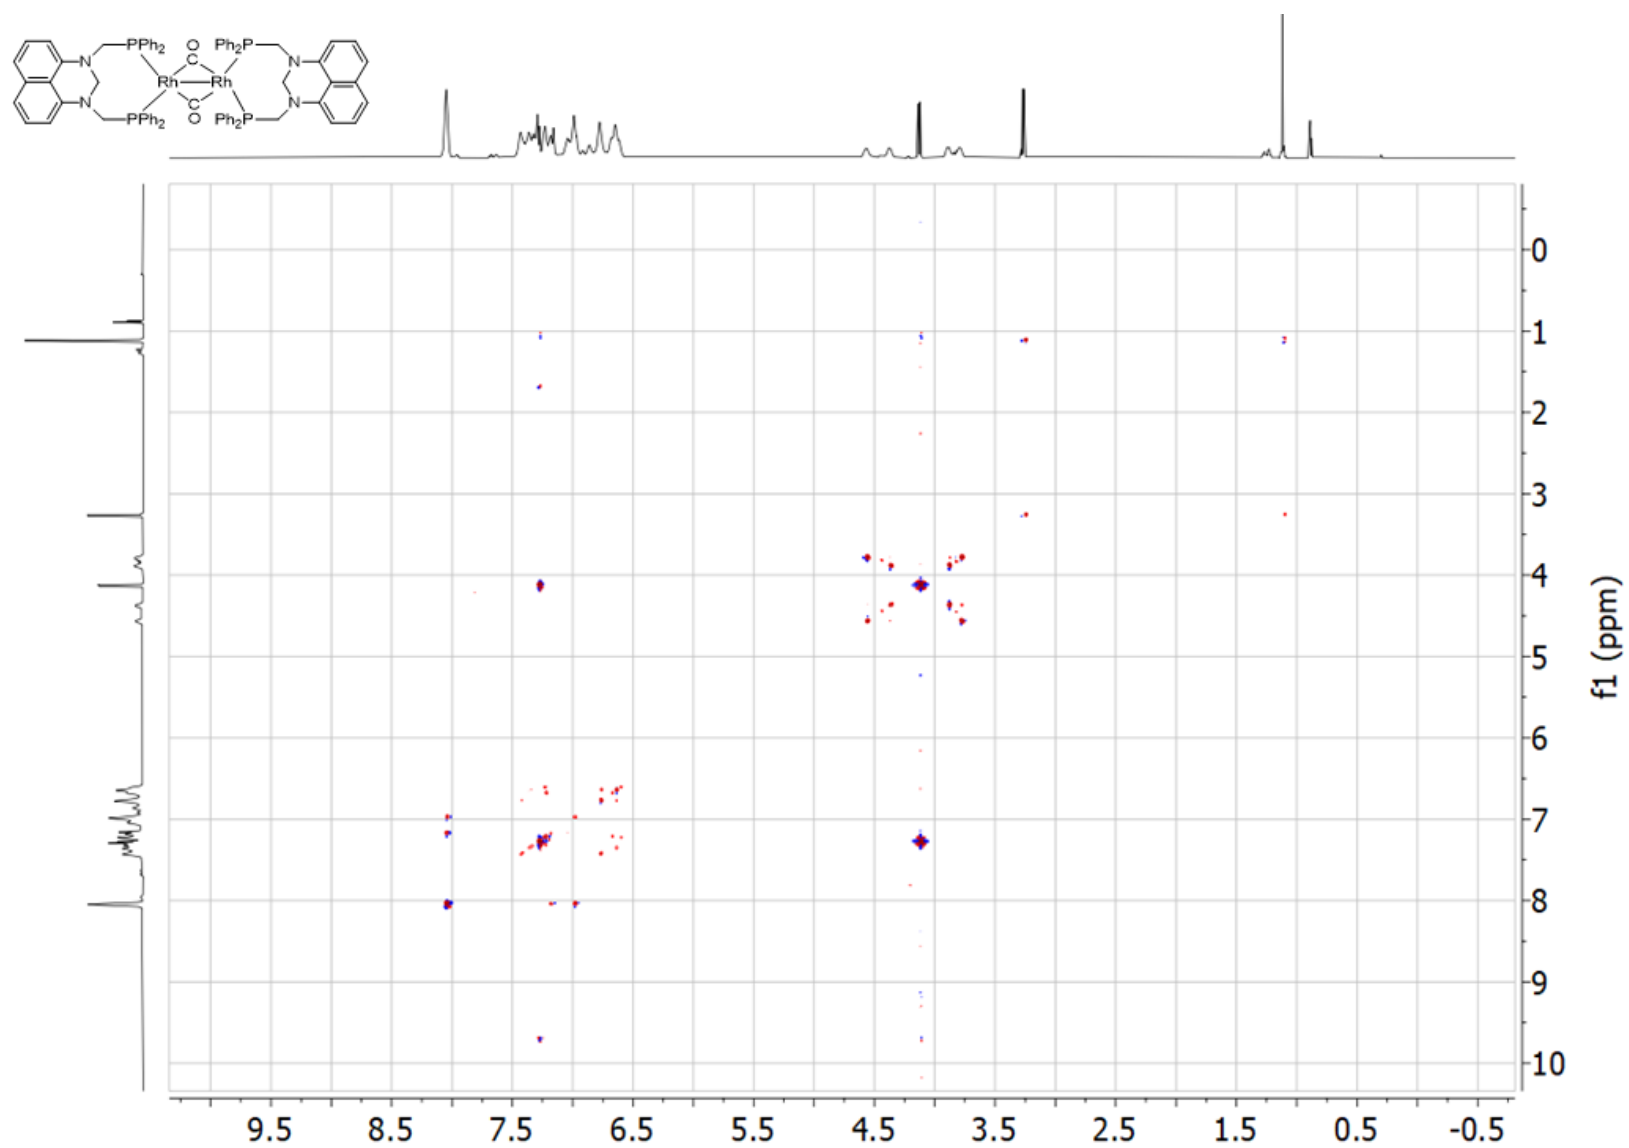COSY NMR ( $\text{C}_6\text{D}_6$ , 298 K) for  $[\text{Rh}_2(\mu\text{-CO})_2(\text{PhH}_2\text{Pm})_2]$  (4).

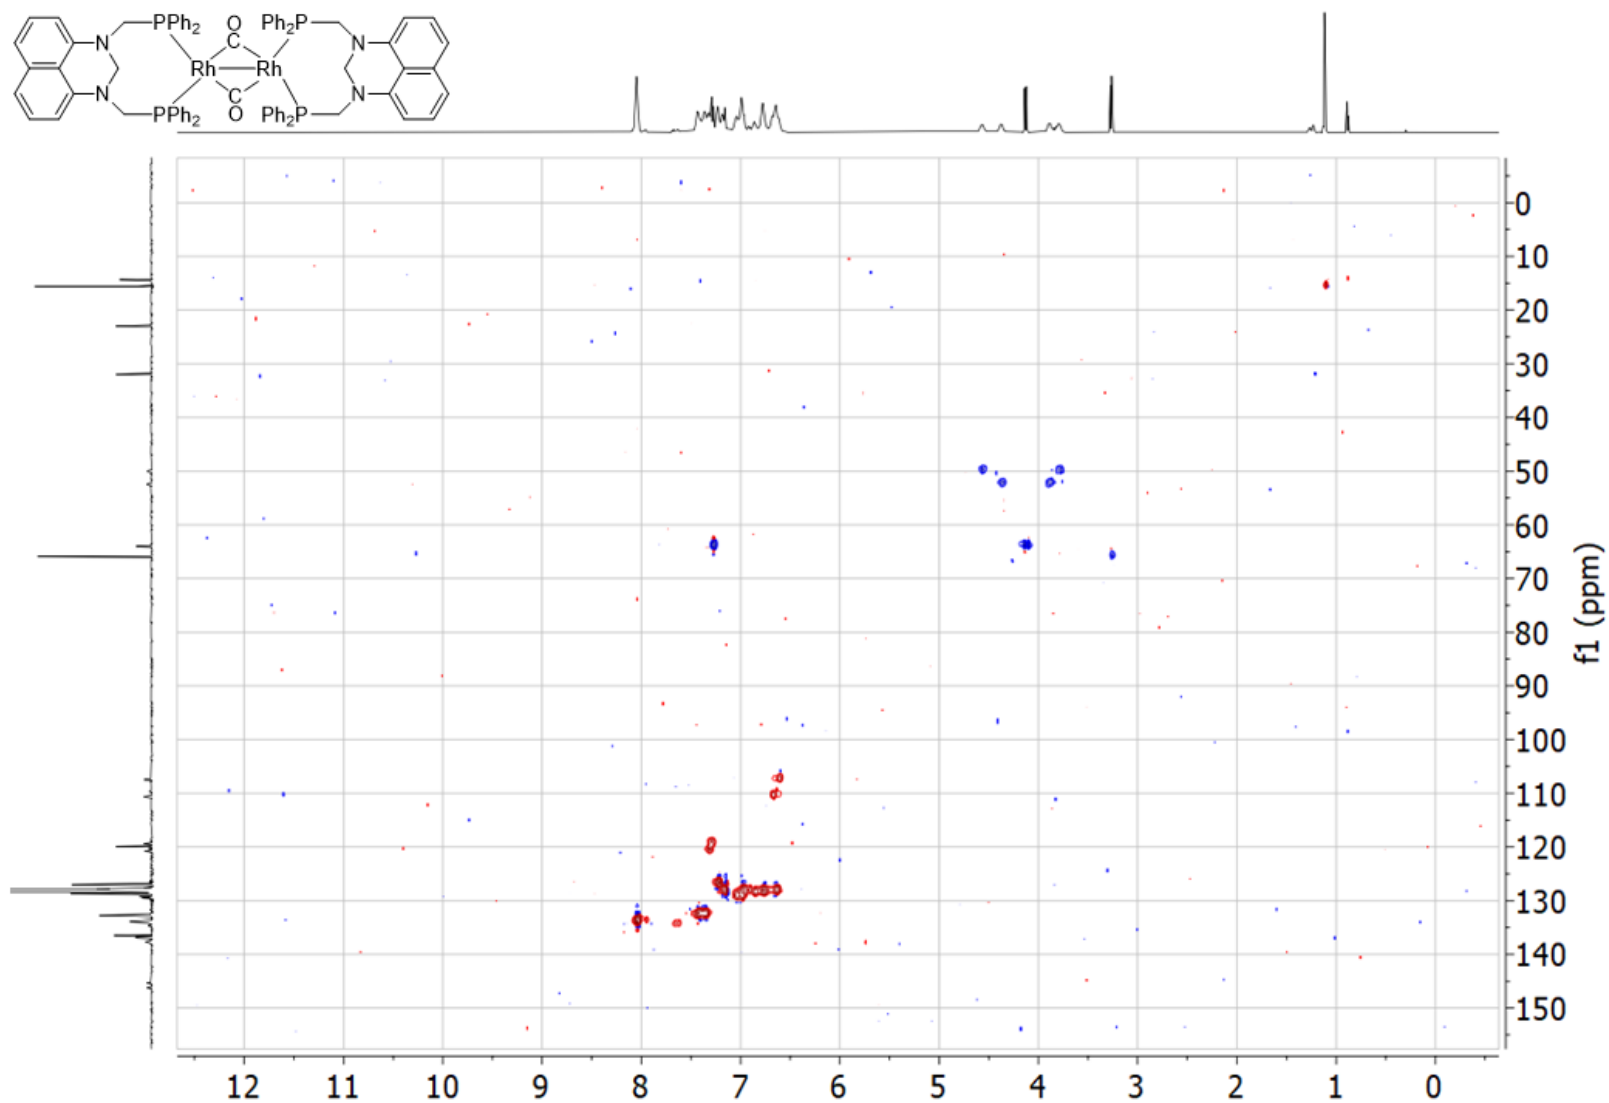HSQC NMR ( $C_6D_6$ , 298 K) for  $[Rh_2(\mu-CO)_2(PhH_2Pm)_2]$  (4).

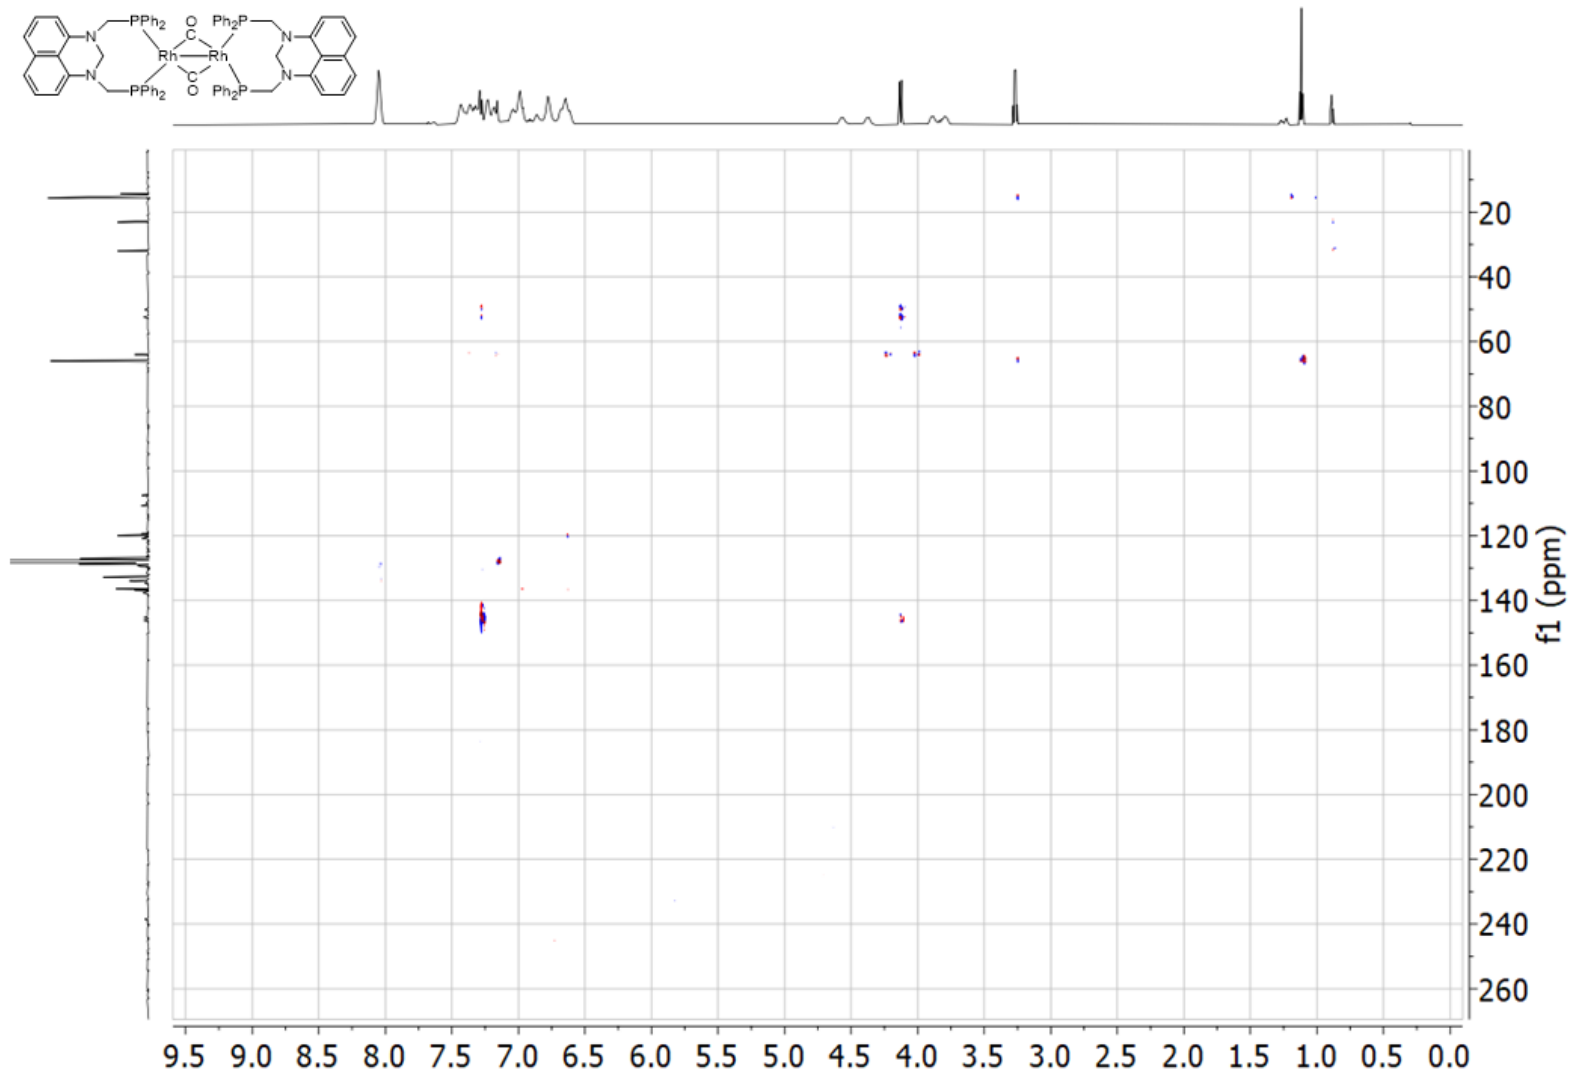HMBC NMR ( $\text{C}_6\text{D}_6$ , 298 K) for  $[\text{Rh}_2(\mu\text{-CO})_2(\text{PhH}_2\text{Pm})_2]$  (4).

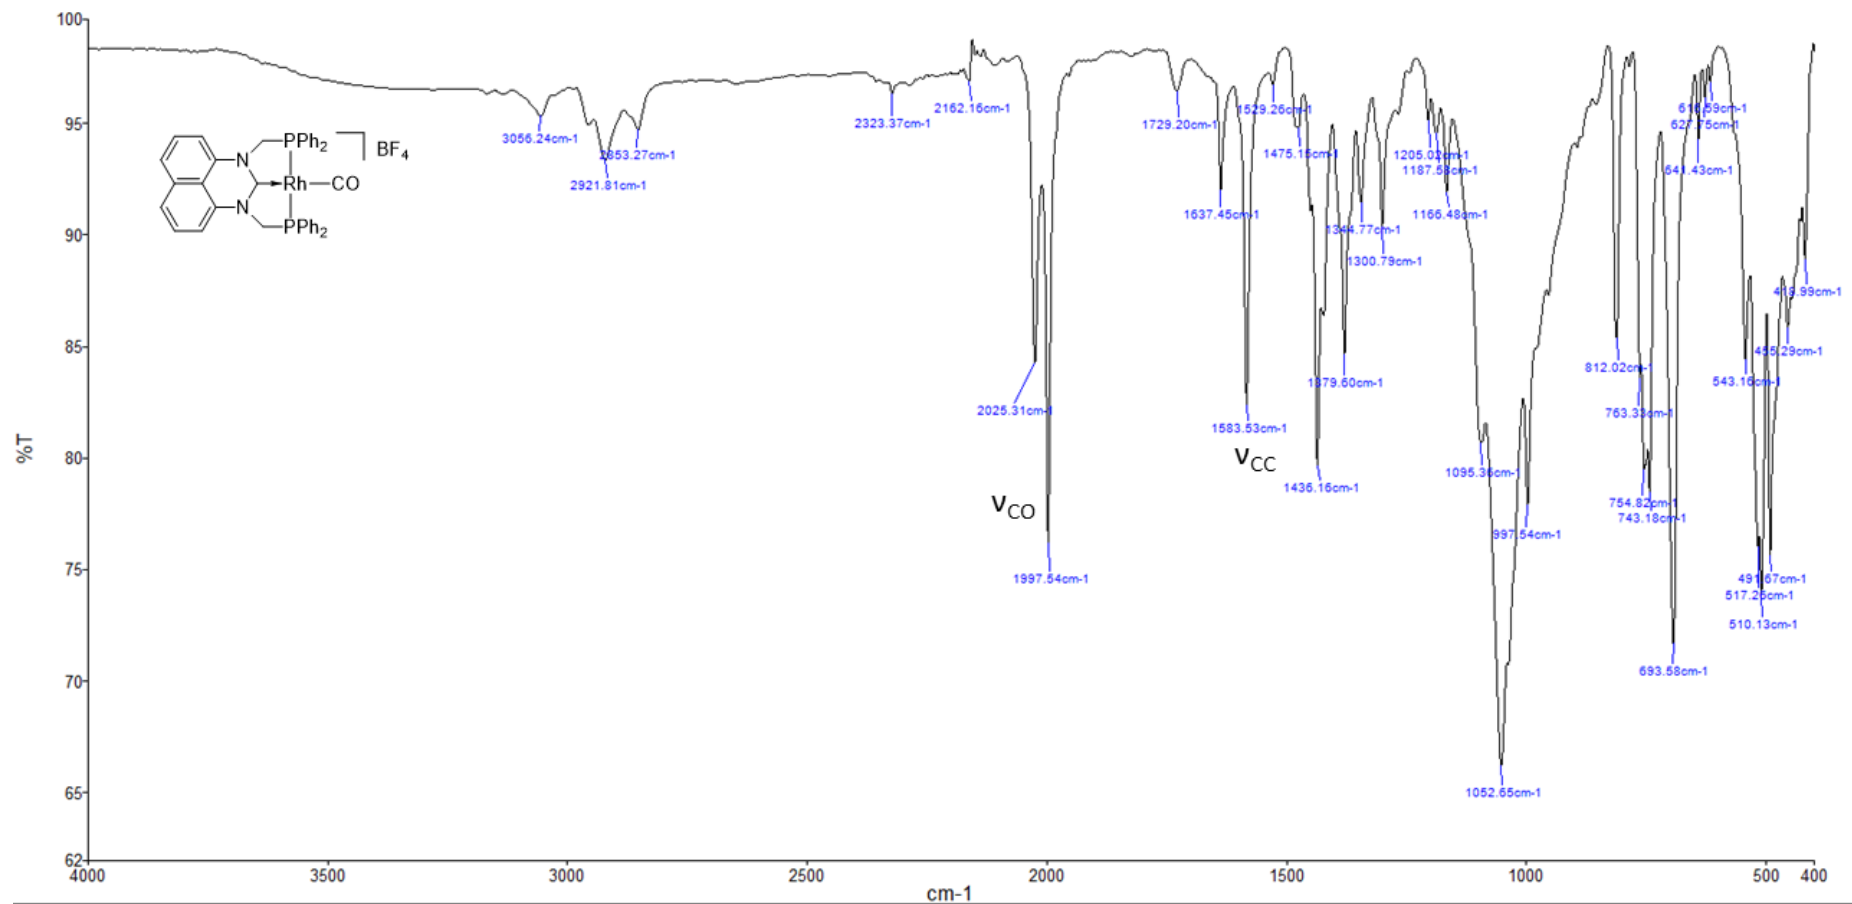

IR (ATR,  $\text{cm}^{-1}$ ) for  $[\text{Rh}(\text{CO})(\text{PhPm})]\text{BF}_4$  (5).

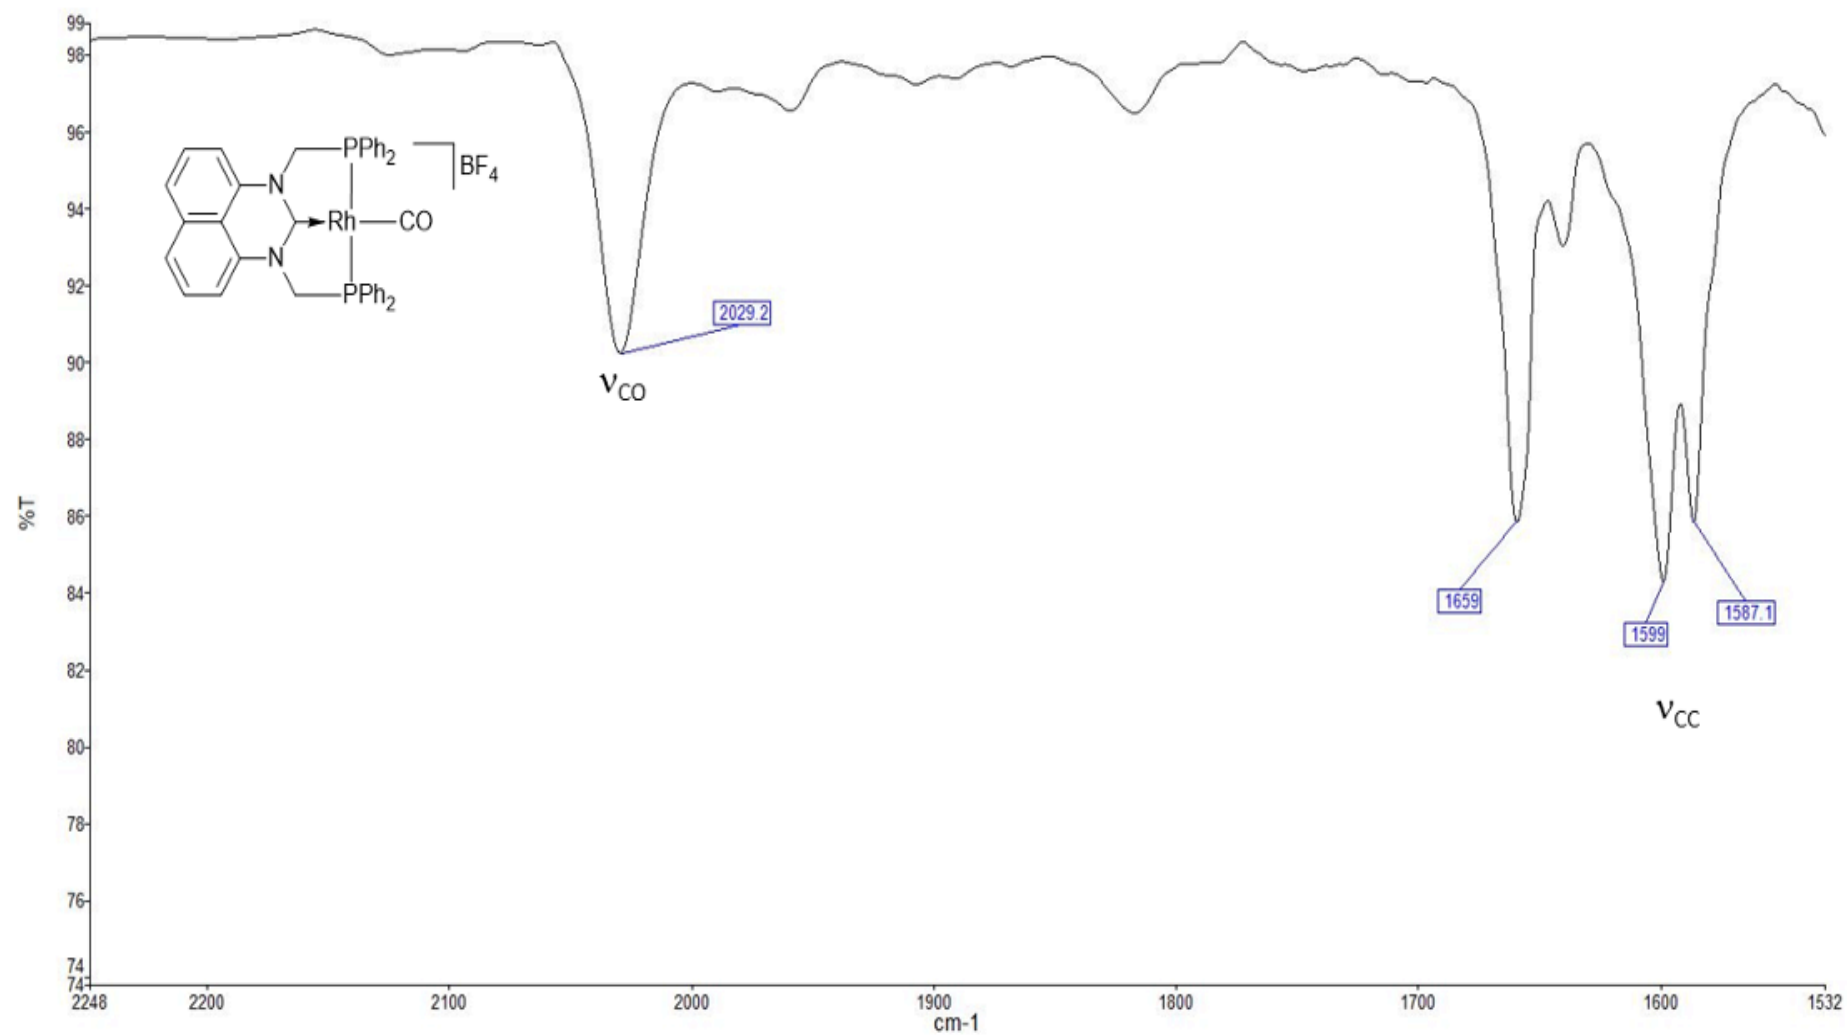

IR ( $\text{CH}_2\text{Cl}_2$ ,  $\text{cm}^{-1}$ ) for  $[\text{Rh}(\text{CO})(\text{PhPm})]\text{BF}_4$  (5).



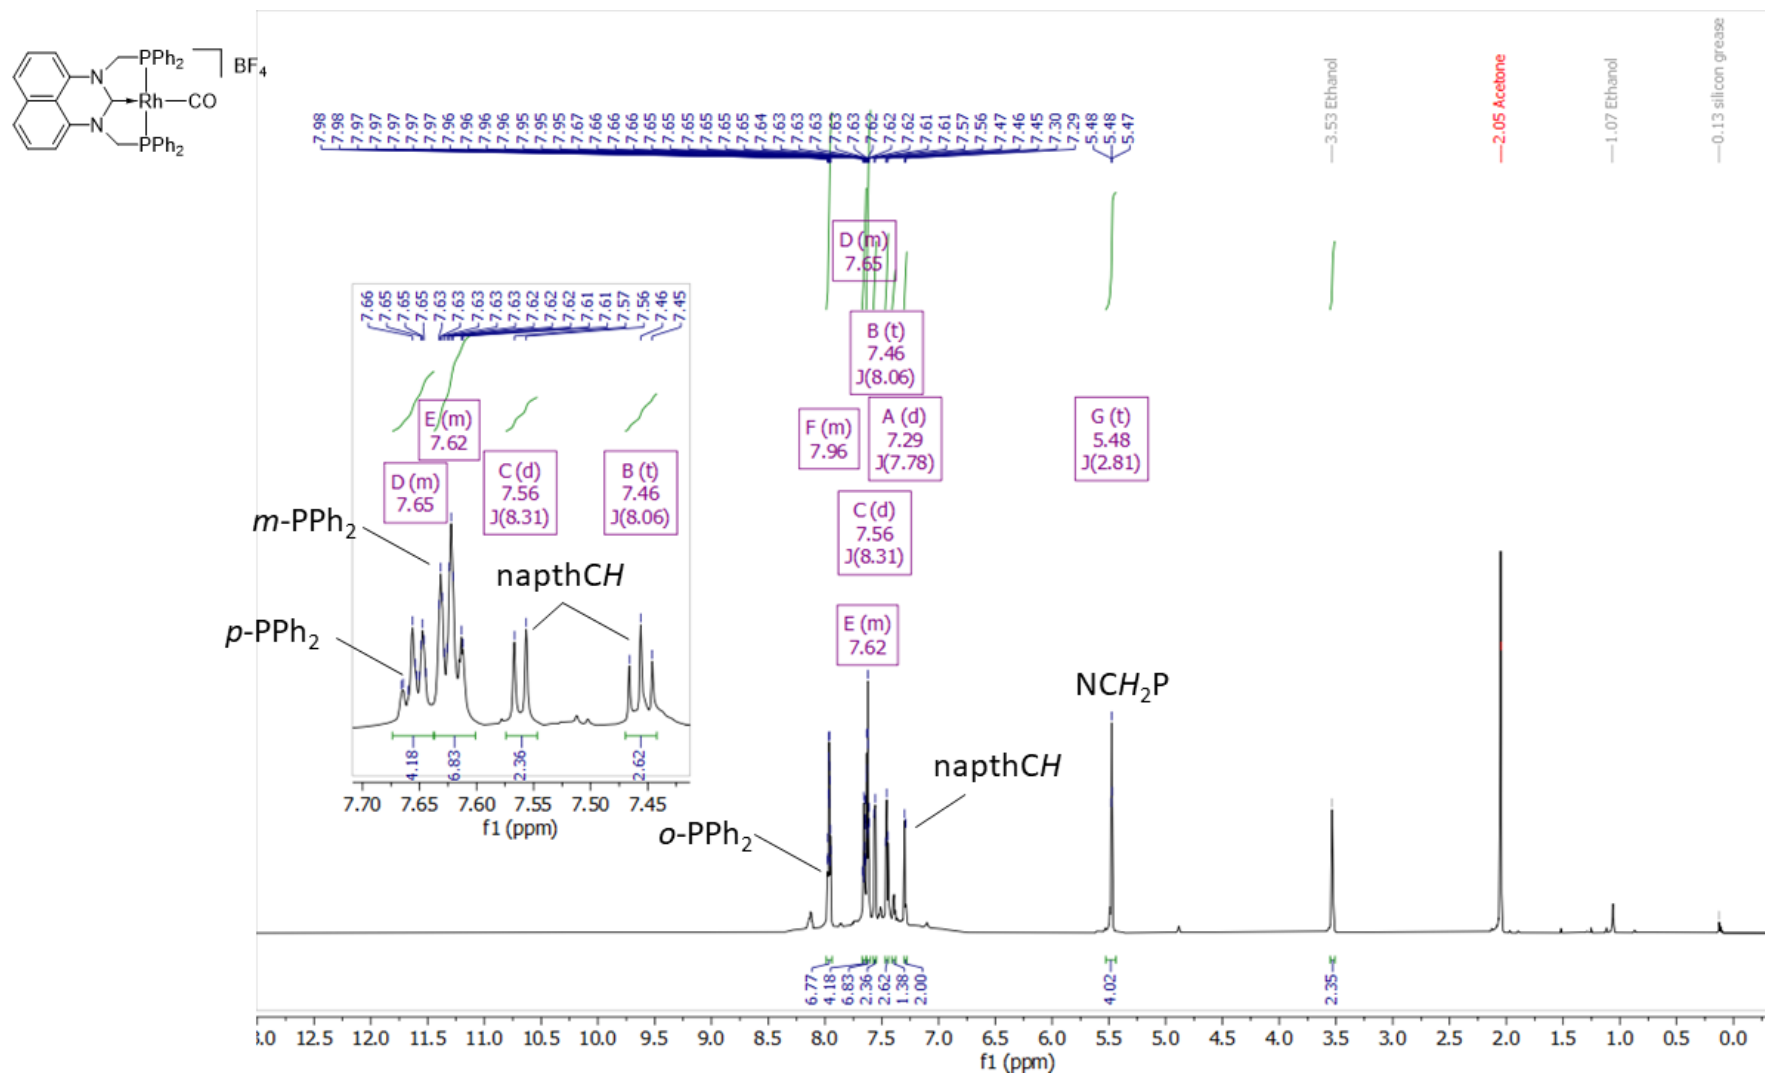

$^1\text{H}$  NMR (800 MHz,  $(\text{CD}_3)_2\text{CO}$ , 298 K for  $[\text{Rh}(\text{CO})(\text{PhPm})]\text{BF}_4$  (5).

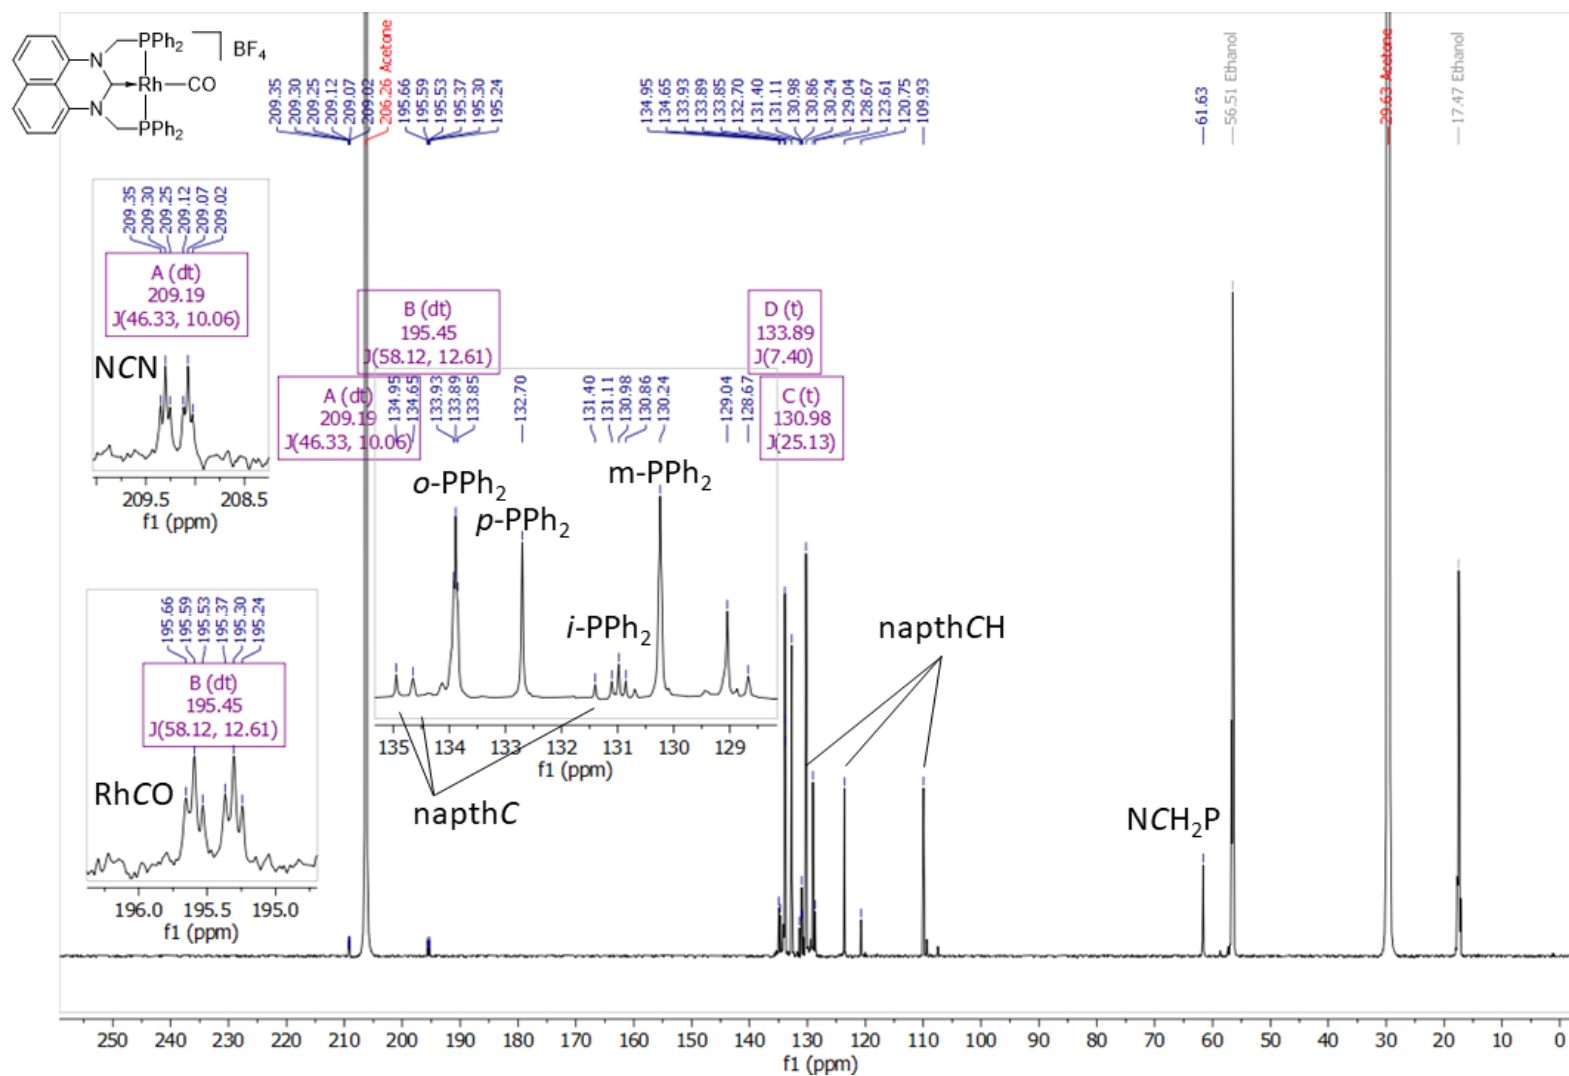

$^{13}\text{C}\{^1\text{H}\}$  NMR (201 MHz,  $(\text{CD}_3)_2\text{CO}$ , 298 K) for  $[\text{Rh}(\text{CO})(\text{PhPm})]\text{BF}_4$  (5).

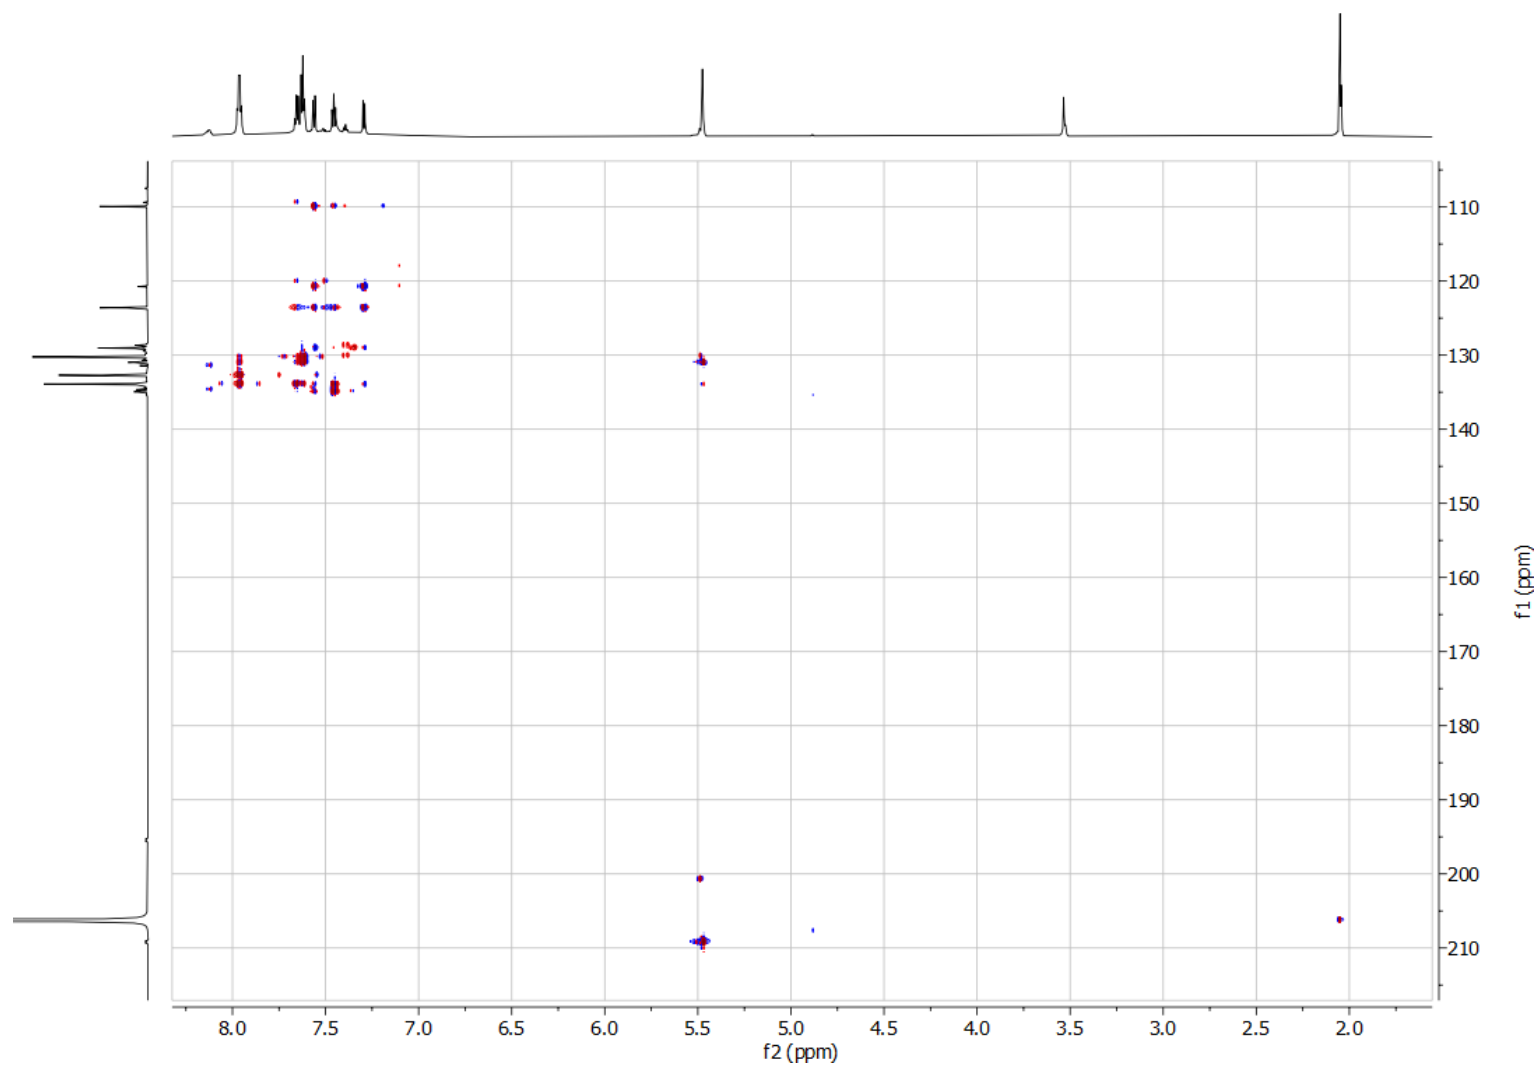

HMBC NMR ( $(\text{CD}_3)_2\text{CO}$ , 298 K) for  $[\text{Rh}(\text{CO})(\text{PhPm})]\text{BF}_4$  (5).

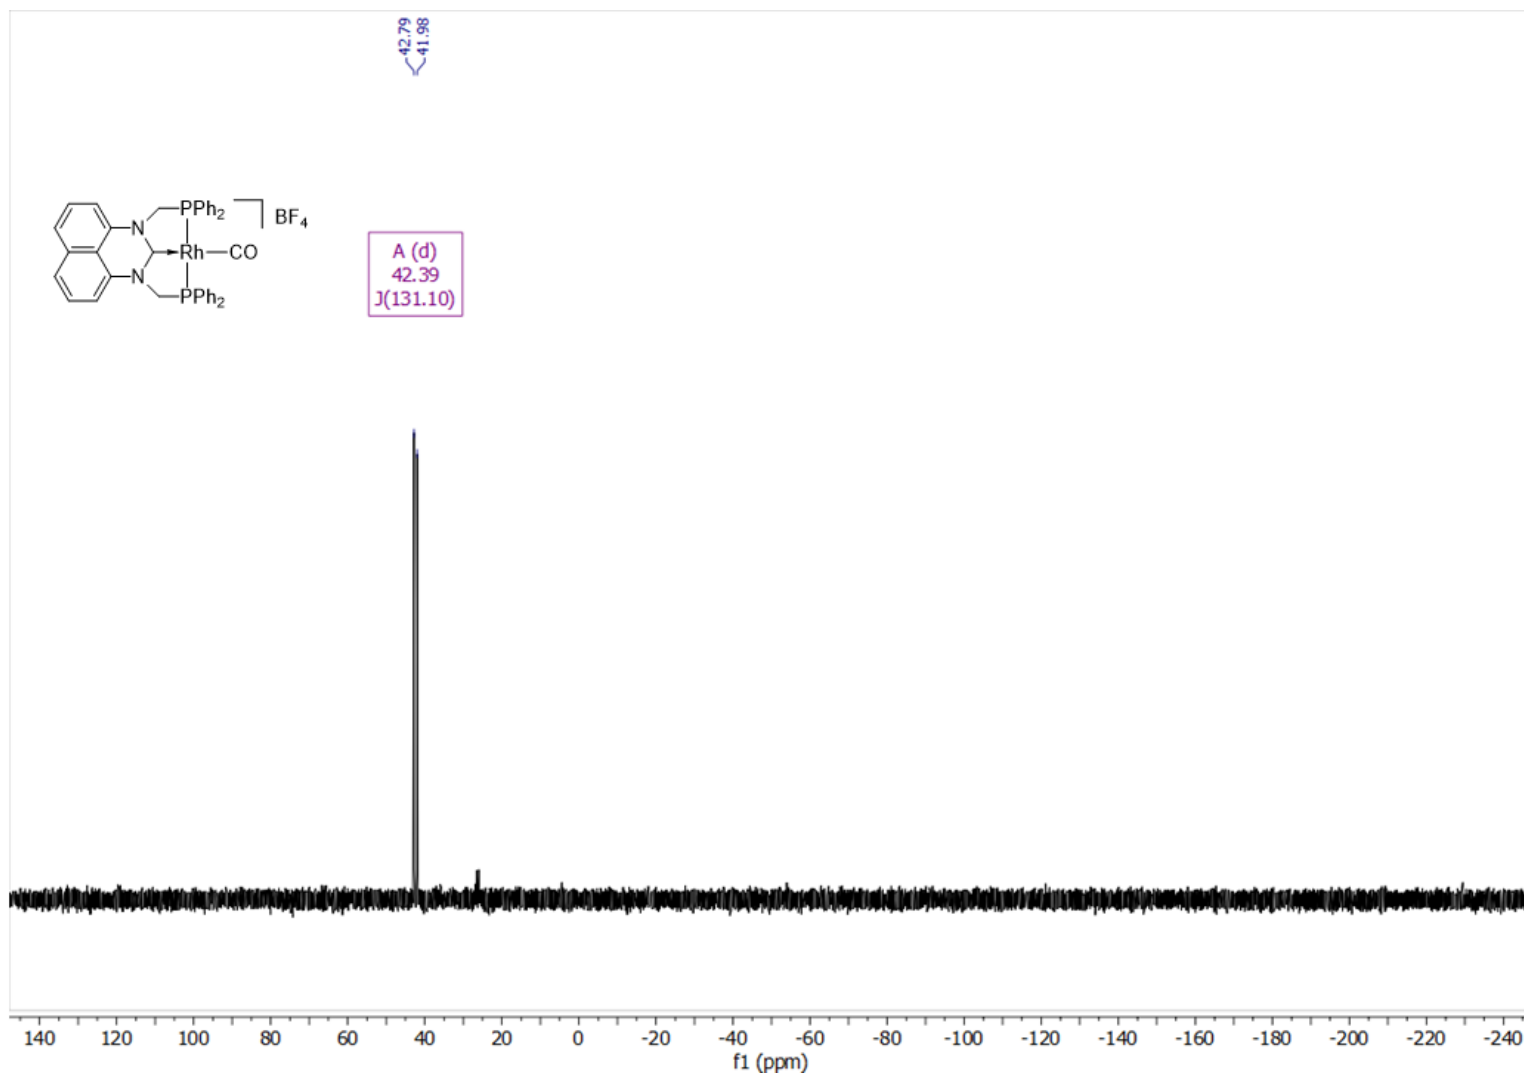

$^{31}\text{P}\{^1\text{H}\}$  NMR (162 MHz,  $\text{CD}_2\text{Cl}_2$ , 298 K) for  $[\text{Rh}(\text{CO})(\text{PhPm})]\text{BF}_4$  (**5**).

**Single Mass Analysis**

Tolerance = 3.0 PPM / DBE: min = -1.5, max = 50.0

Element prediction: Off

Number of isotope peaks used for i-FIT = 2

Monoisotopic Mass, Odd and Even Electron Ions

77 formula(e) evaluated with 1 results within limits (all results (up to 1000) for each mass)

Elements Used:

C: 0-40 H: 0-40 N: 0-2 O: 0-3 P: 0-2 103Rh: 0-1

LJW-499/AJ

SYNAPTG2-Si#NotSet

05-May-2022

67014

13:07:50

2365A 197 (0.412)

1: TOF MS ES+

1.89e+006

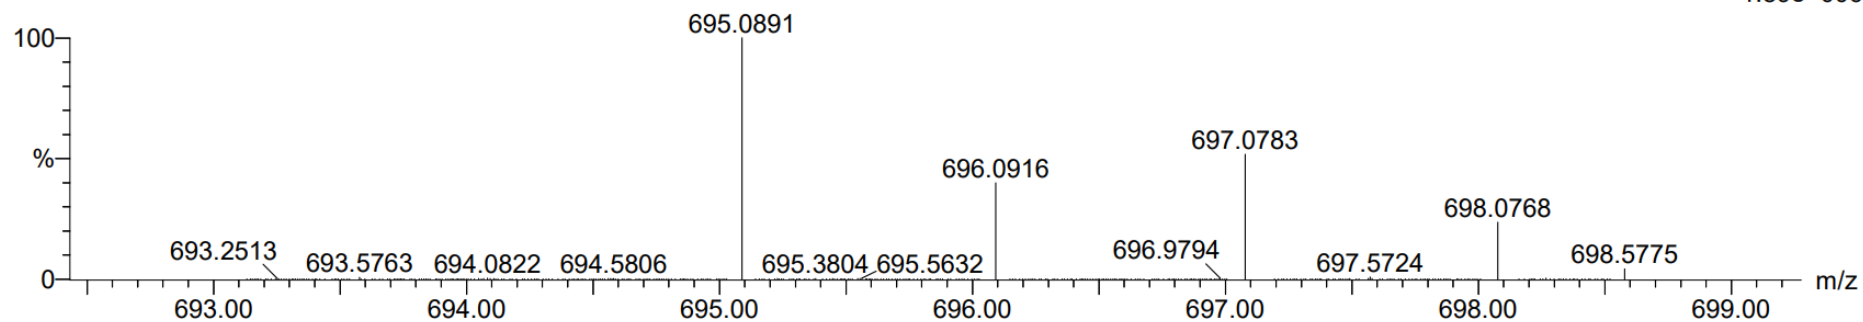

Minimum: -1.5  
 Maximum: 25.0 3.0 50.0

| Mass     | Calc. Mass | mDa | PPM | DBE  | i-FIT  | Formula               |
|----------|------------|-----|-----|------|--------|-----------------------|
| 695.0891 | 695.0888   | 0.3 | 0.4 | 26.0 | 1439.5 | C38 H30 N2 O P2 103Rh |

MS (ESI, +ve ion) for [Rh(CO)(PhPm)]BF<sub>4</sub> (5).

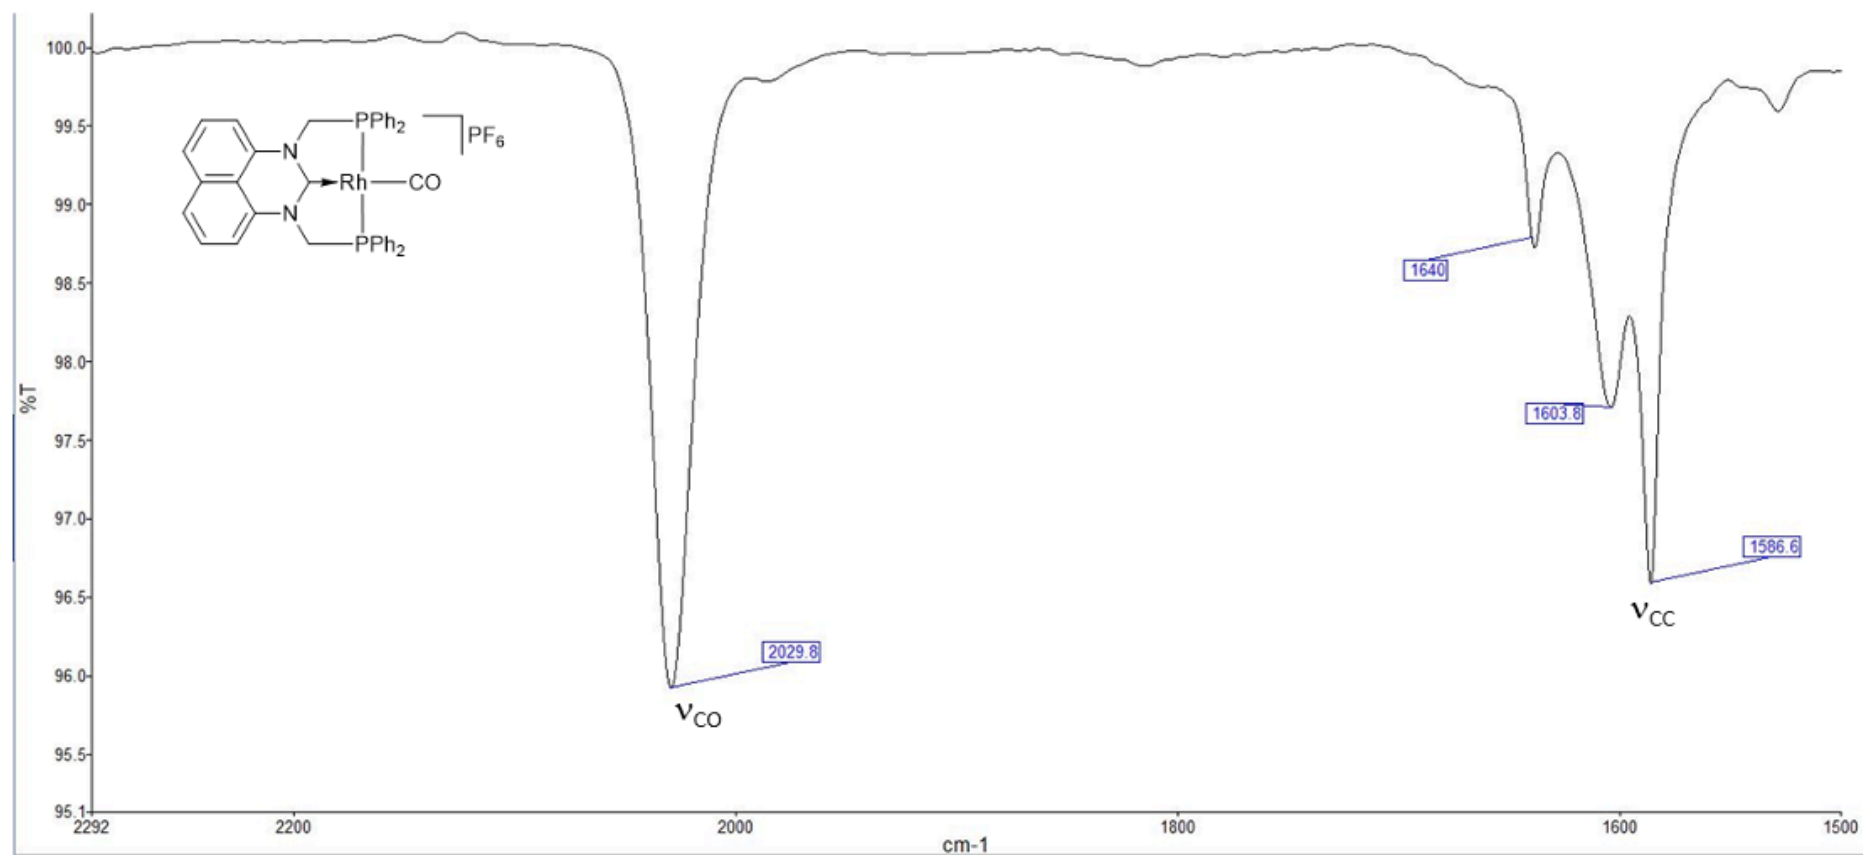

IR (ATR,  $\text{cm}^{-1}$ ) for  $[\text{Rh}(\text{CO})(\text{PhPm})]\text{PF}_6$  (5).

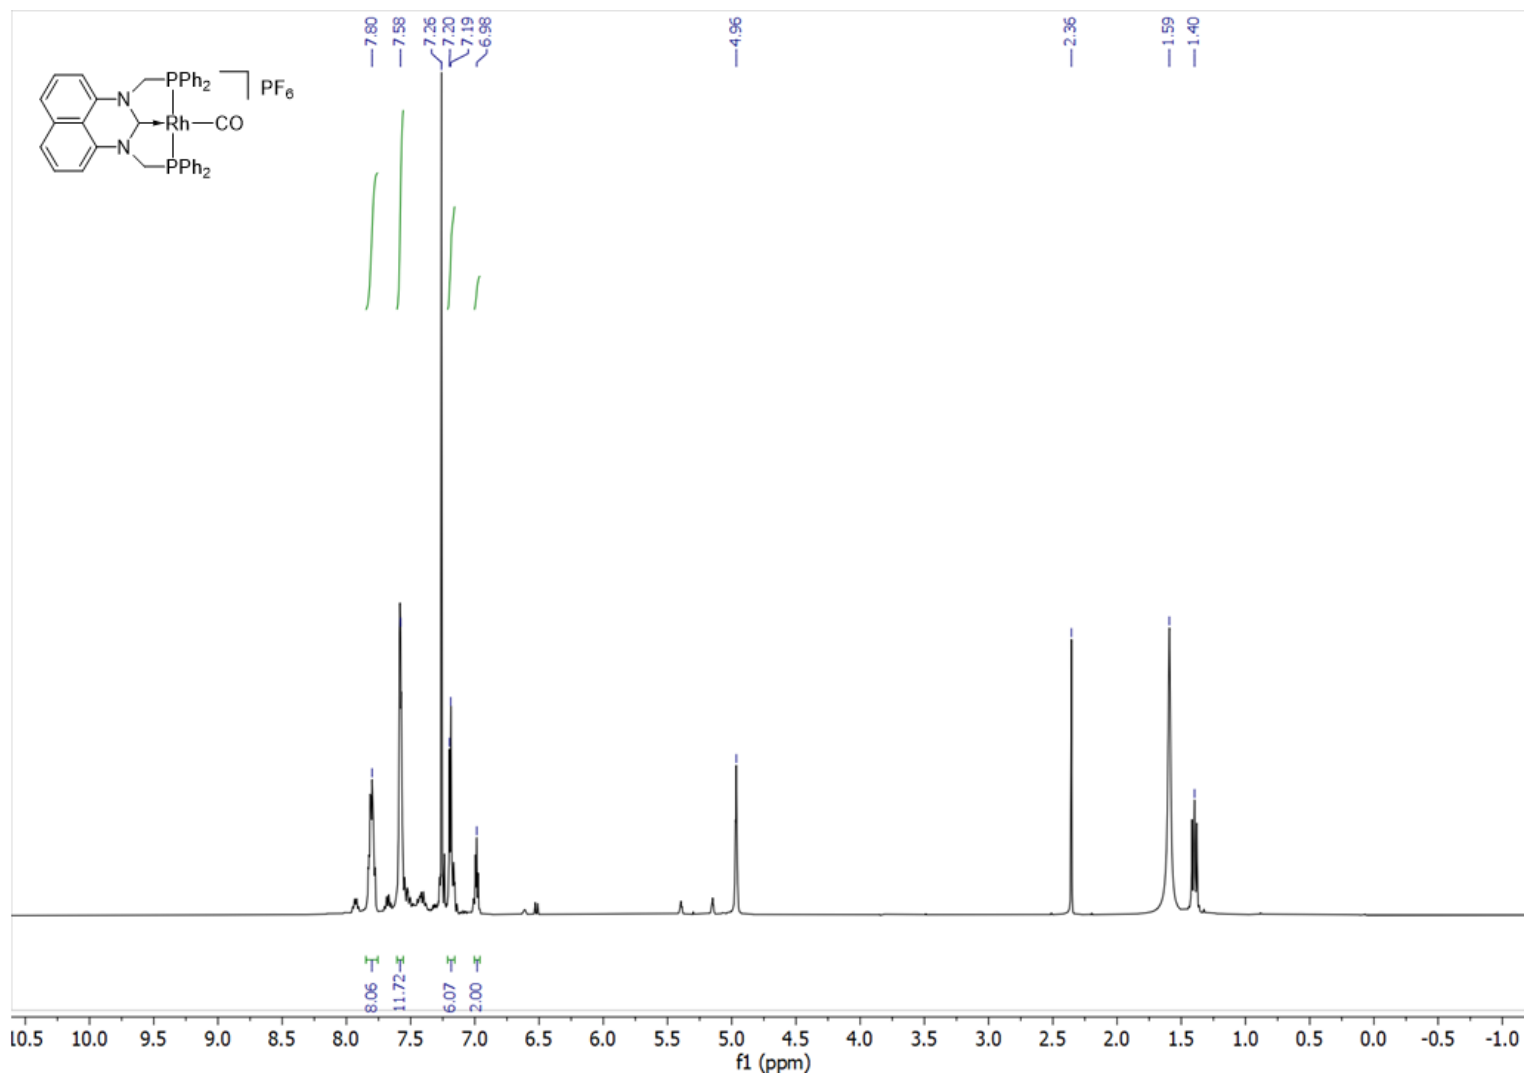

$^1\text{H}$  NMR (400 MHz,  $\text{CDCl}_3$ , 298 K) for  $[\text{Rh}(\text{CO})(\text{PhPm})]\text{PF}_6$  (5).

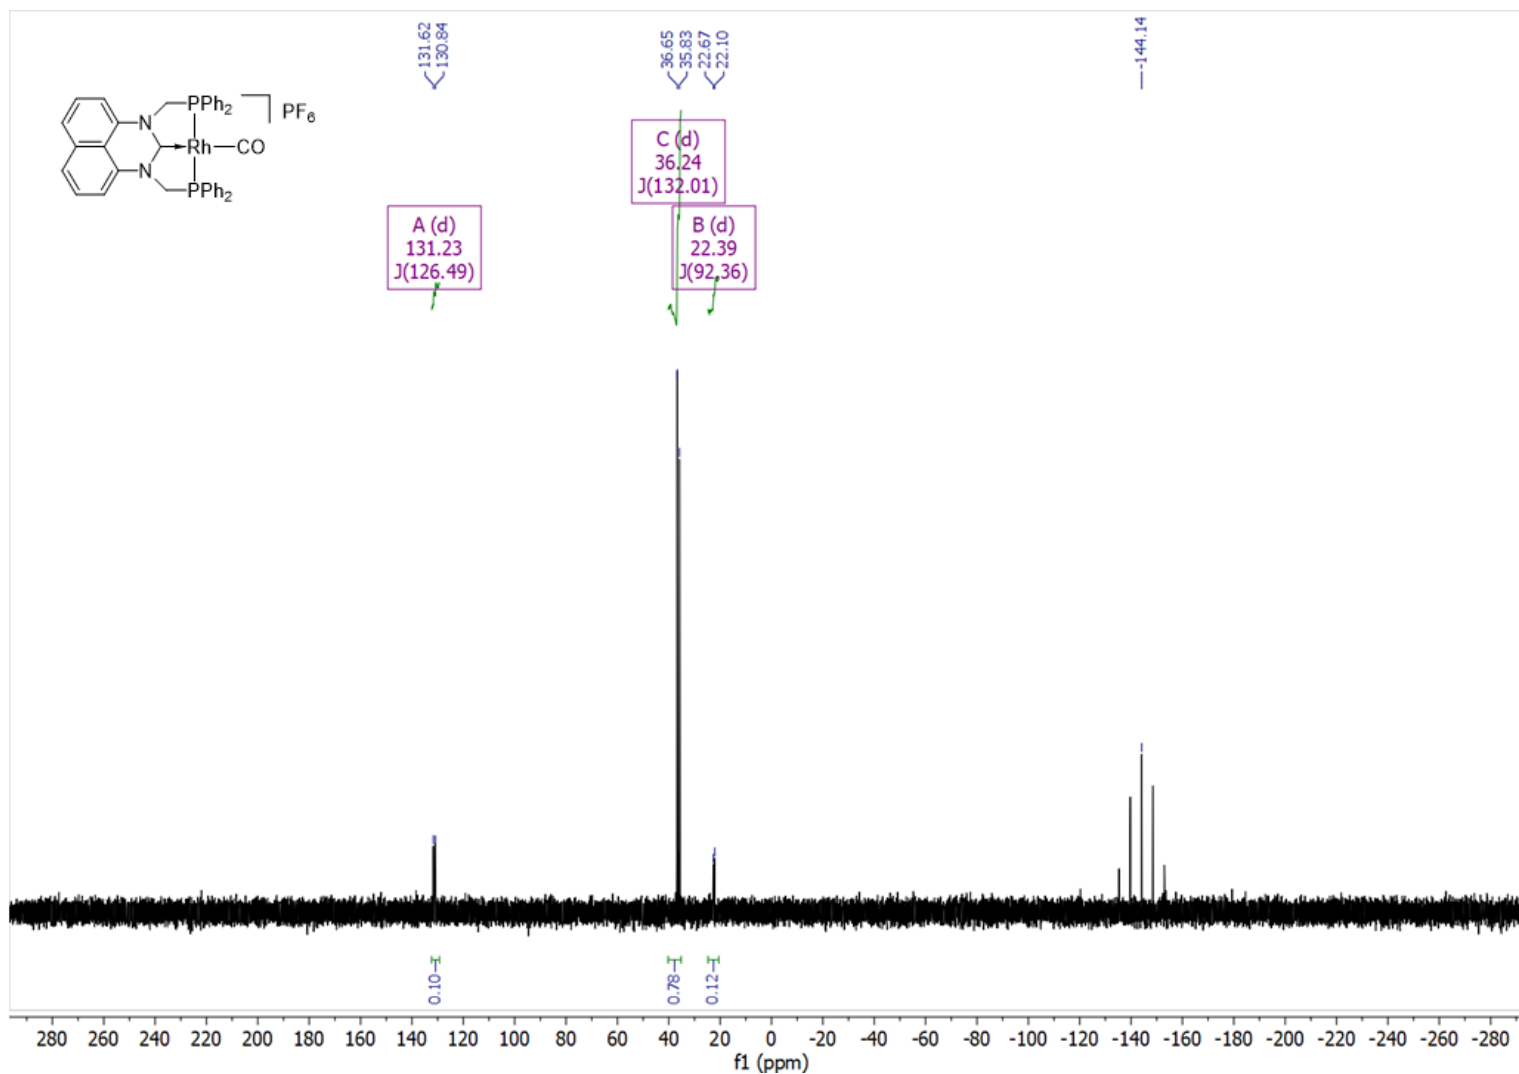

$^{31}\text{P}\{^1\text{H}\}$  NMR (283 MHz,  $\text{CDCl}_3$ , 298 K) for  $[\text{Rh}(\text{CO})(\text{PhPm})]\text{PF}_6$  (5).



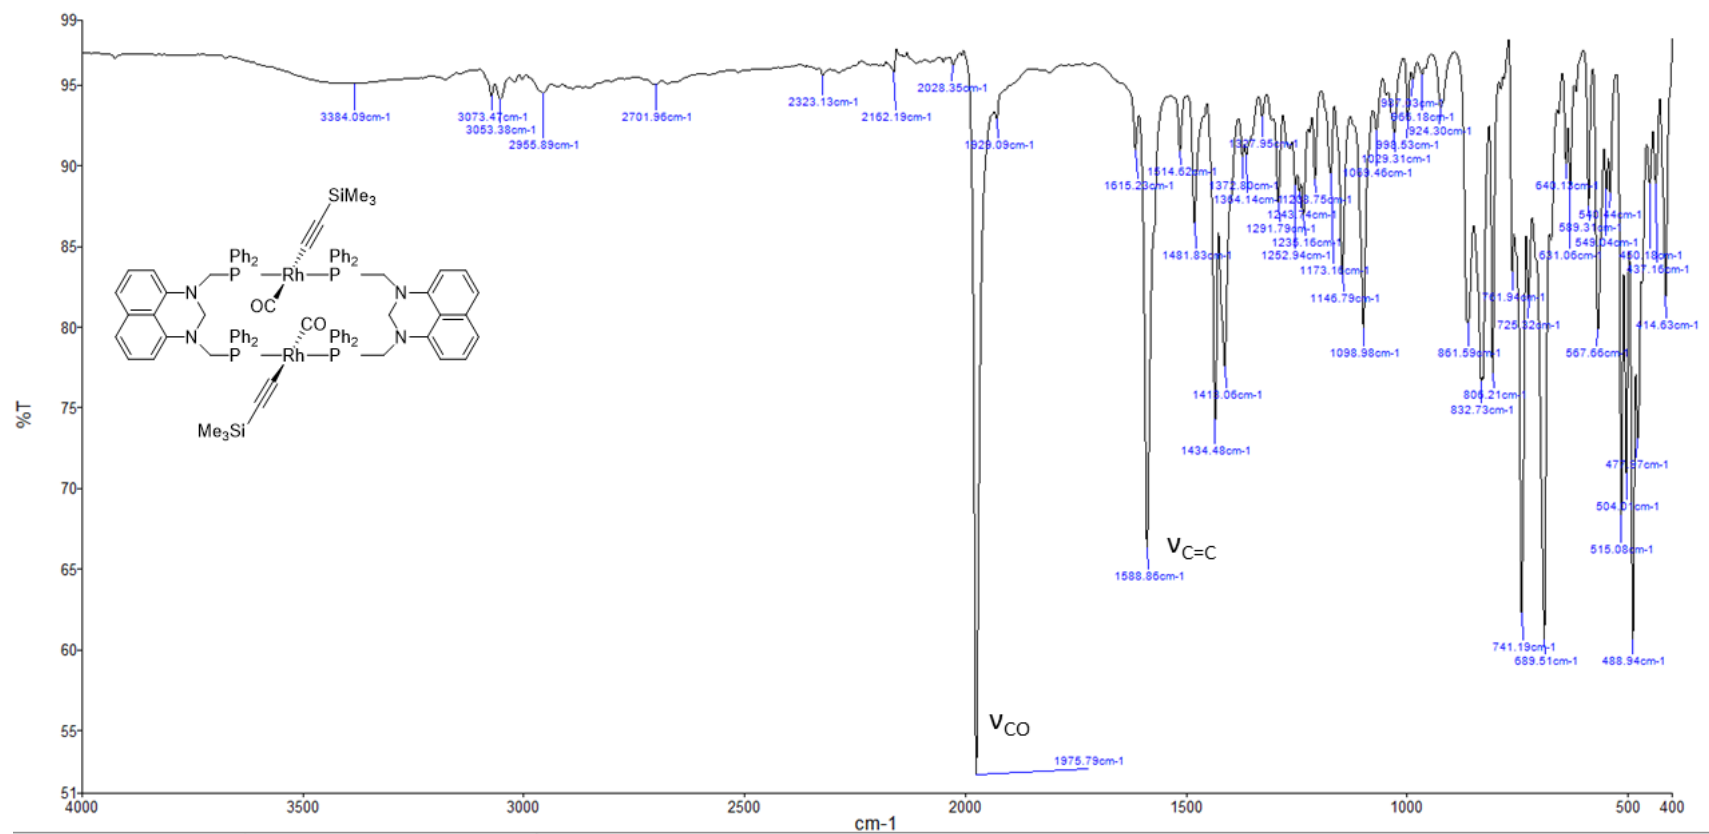

IR (ATR,  $\text{cm}^{-1}$ ) for  $[\text{Rh}(\text{CO})(\text{C}\equiv\text{CSiMe}_3)(\mu\text{-PhH}_2\text{Pm})]_2$  (**6**).

## ELECTRONIC SUPPORTING INFORMATION

## Dalton Transactions

## Single Mass Analysis

Tolerance = 3.0 PPM / DBE: min = -1.5, max = 28.0

Element prediction: Off

Number of isotope peaks used for i-FIT = 2

Monoisotopic Mass, Odd and Even Electron Ions

847 formula(e) evaluated with 1 results within limits (all results (up to 1000) for each mass)

Elements Used:

C: 0-50 H: 0-50 N: 0-5 O: 0-5 P: 0-2 103Rh: 0-1

LJW-371/AJ

66943

1969 50 (0.117) Cm (37:50)

1: TOF MS ES+

SYNAPTG2-Si#NotSet

04-Feb-2022

13:55:52

1.06e+006

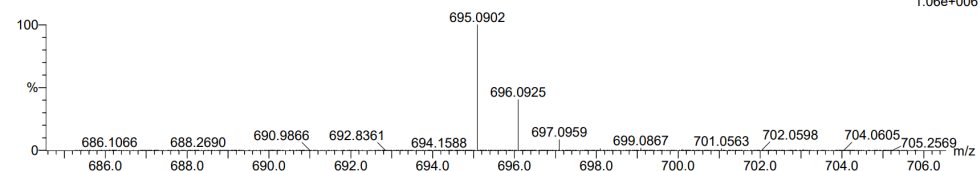

Minimum: -1.5  
Maximum: 25.0 3.0 28.0

| Mass     | Calc. Mass | mDa | PPM | DBE  | i-FIT | Norm | Conf (%) | Formula               |
|----------|------------|-----|-----|------|-------|------|----------|-----------------------|
| 695.0902 | 695.0888   | 1.4 | 2.0 | 26.0 | 881.2 | n/a  | n/a      | C38 H30 N2 O P2 103Rh |

## Single Mass Analysis

Tolerance = 3.0 PPM / DBE: min = -1.5, max = 28.0

Element prediction: Off

Number of isotope peaks used for i-FIT = 2

Monoisotopic Mass, Odd and Even Electron Ions

903 formula(e) evaluated with 1 results within limits (all results (up to 1000) for each mass)

Elements Used:

C: 0-50 H: 0-50 N: 0-5 O: 0-5 P: 0-2 103Rh: 0-1

LJW-371/AJ

66943

1969 50 (0.117) Cm (37:50)

1: TOF MS ES+

SYNAPTG2-Si#NotSet

04-Feb-2022

13:55:52

2.02e+005

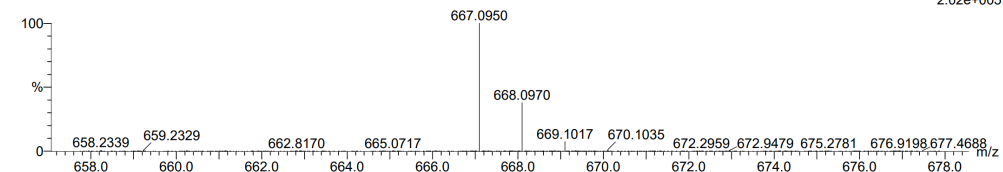

Minimum: -1.5  
Maximum: 25.0 3.0 28.0

| Mass     | Calc. Mass | mDa | PPM | DBE  | i-FIT | Norm | Conf (%) | Formula             |
|----------|------------|-----|-----|------|-------|------|----------|---------------------|
| 667.0950 | 667.0939   | 1.1 | 1.6 | 25.0 | 662.9 | n/a  | n/a      | C37 H30 N2 P2 103Rh |

MS (ESI, +ve ion) for [Rh(CO)(PhPm)]PF<sub>6</sub> (5).

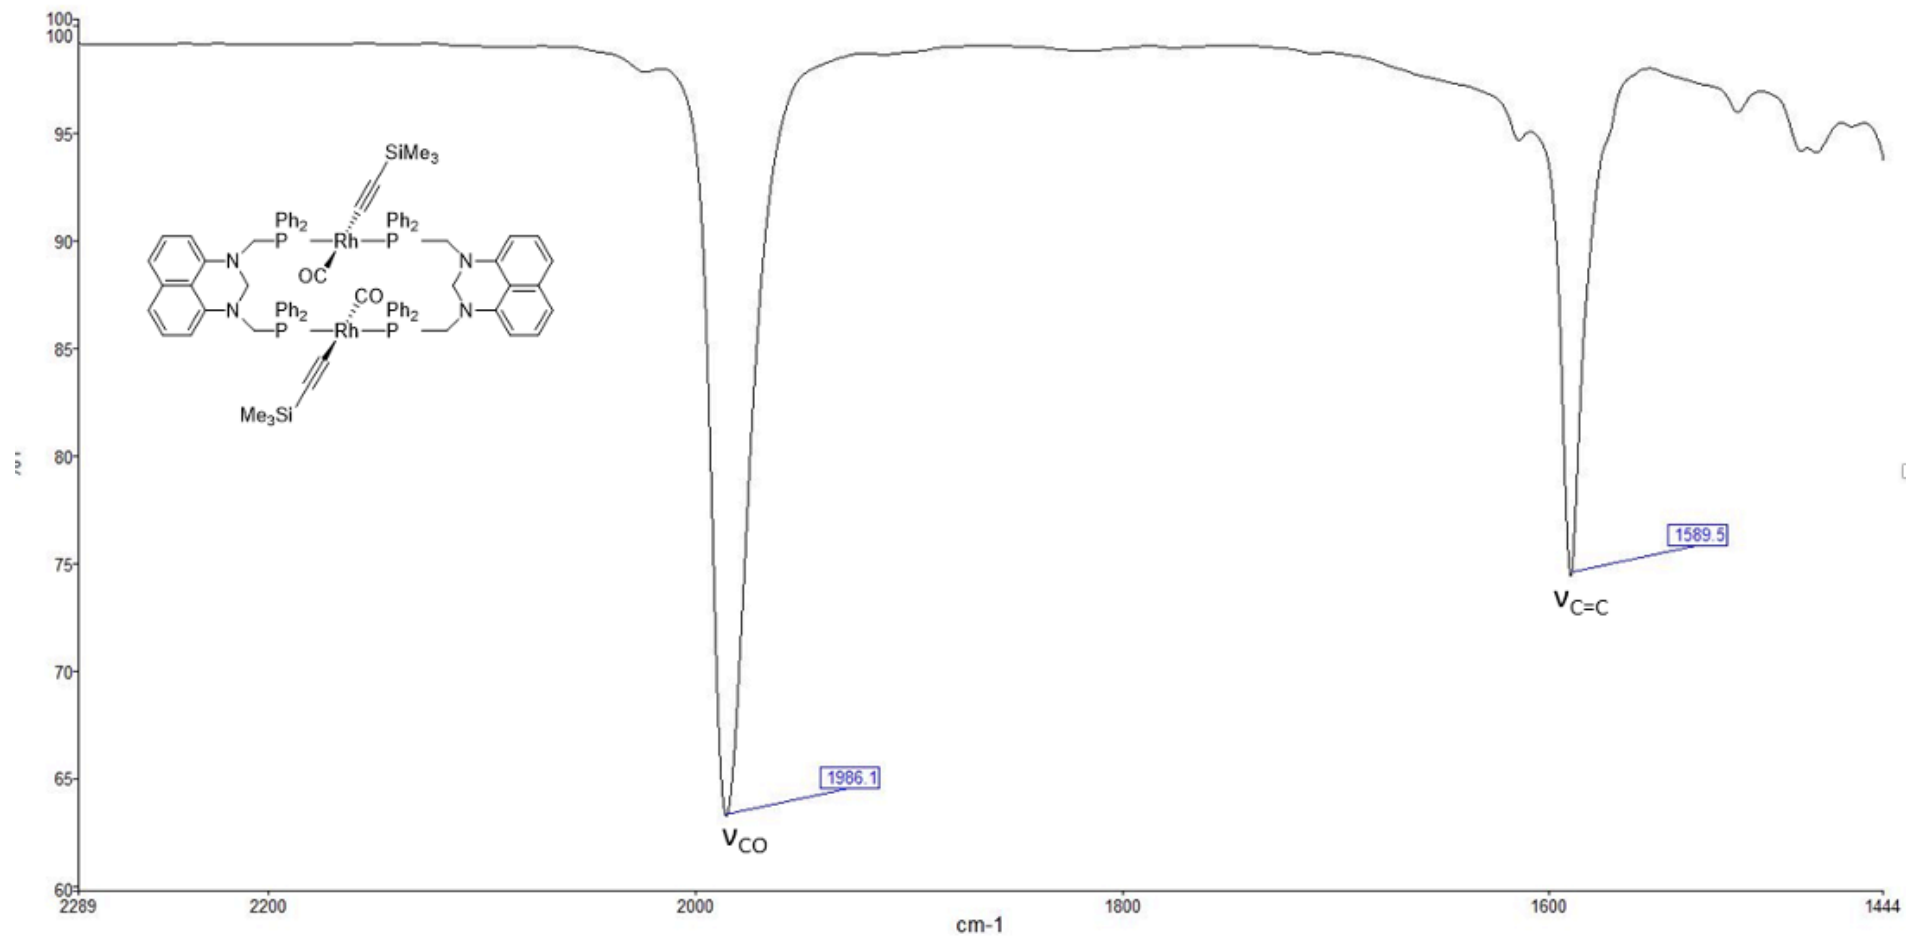

IR ( $\text{CH}_2\text{Cl}_2$ ,  $\text{cm}^{-1}$ ) for  $[\text{Rh}(\text{CO})(\text{C}\equiv\text{CSiMe}_3)(\mu\text{-PhH}_2\text{Pm})]_2$  (6).

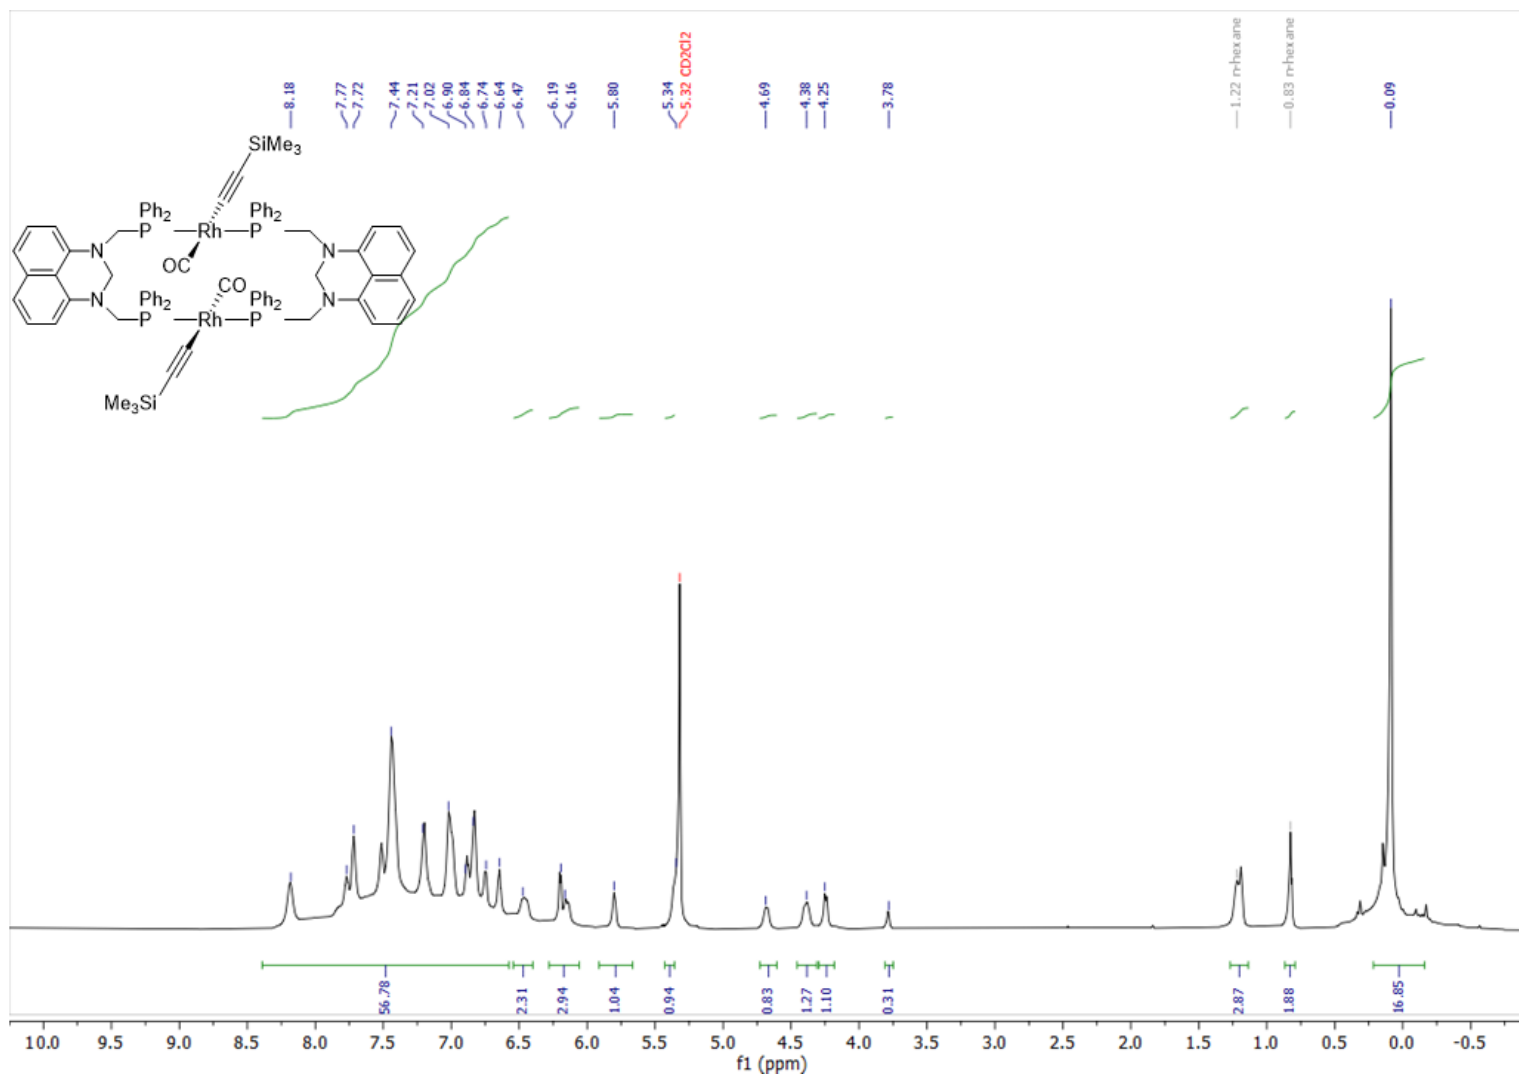

$^1\text{H}$  NMR (700 MHz,  $\text{CD}_2\text{Cl}_2$ , 213 K) for  $[\text{Rh}(\text{CO})(\text{C}\equiv\text{CSiMe}_3)(\mu\text{-PhH}_2\text{Pm})]_2$  (6).

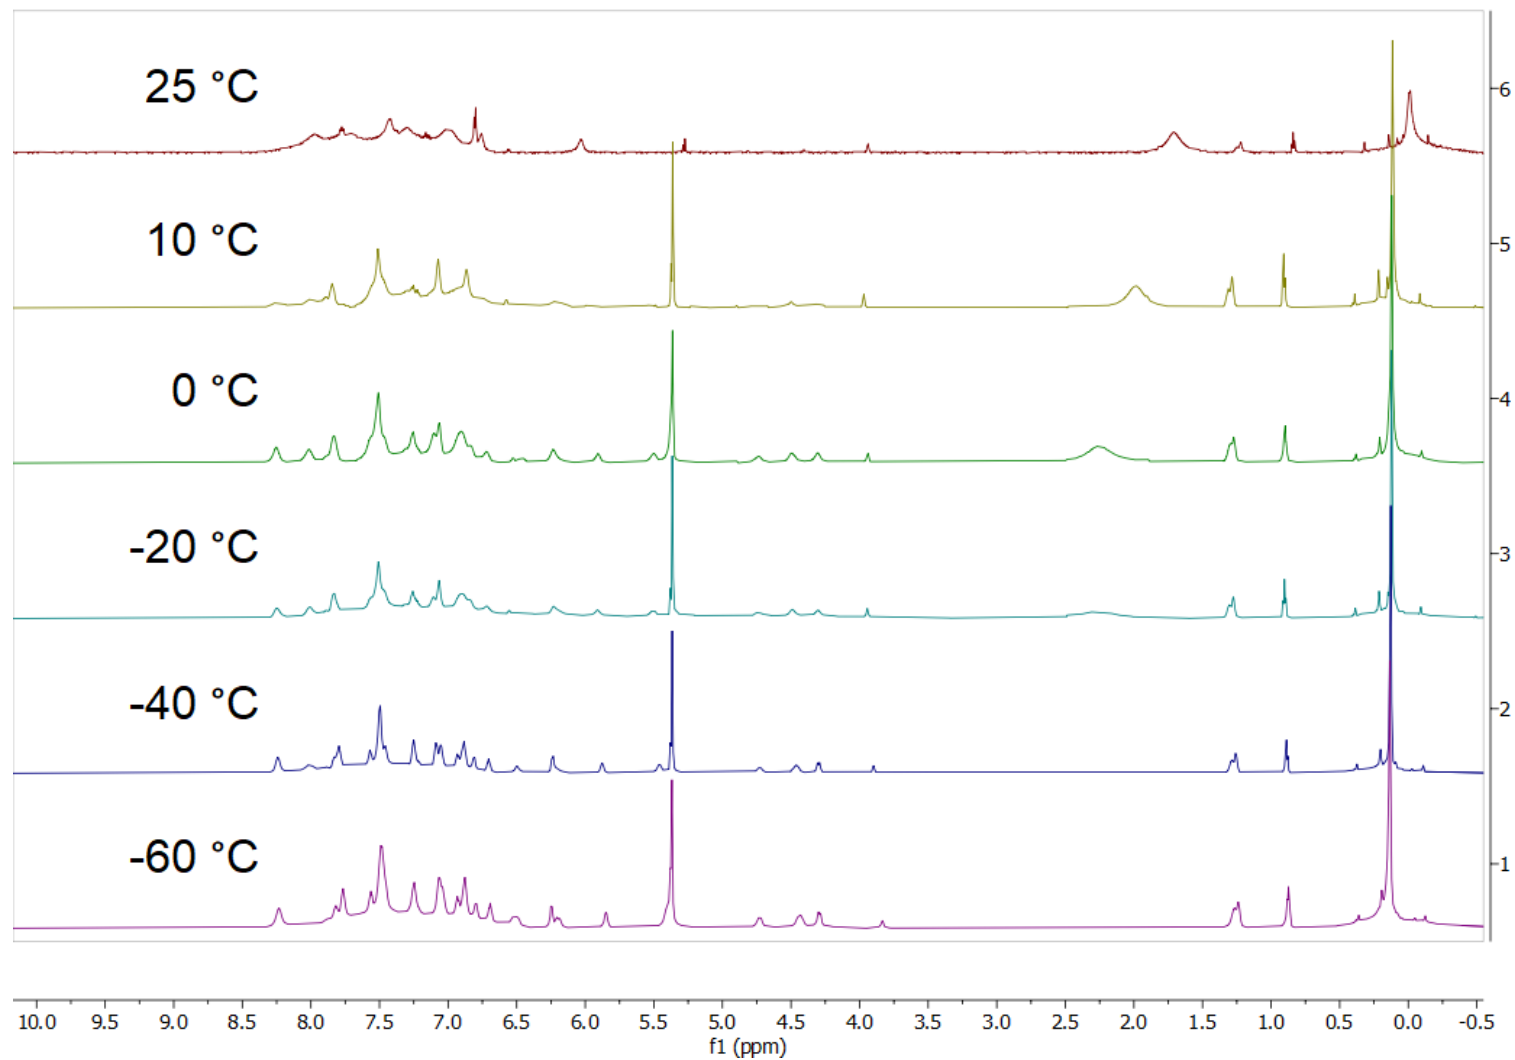

Variable temperature  $^1\text{H}$  NMR (700 MHz,  $\text{CD}_2\text{Cl}_2$ ) for  $[\text{Rh}(\text{CO})(\text{C}\equiv\text{CSiMe}_3)(\mu\text{-PhH}_2\text{Pm})]_2$  (6).

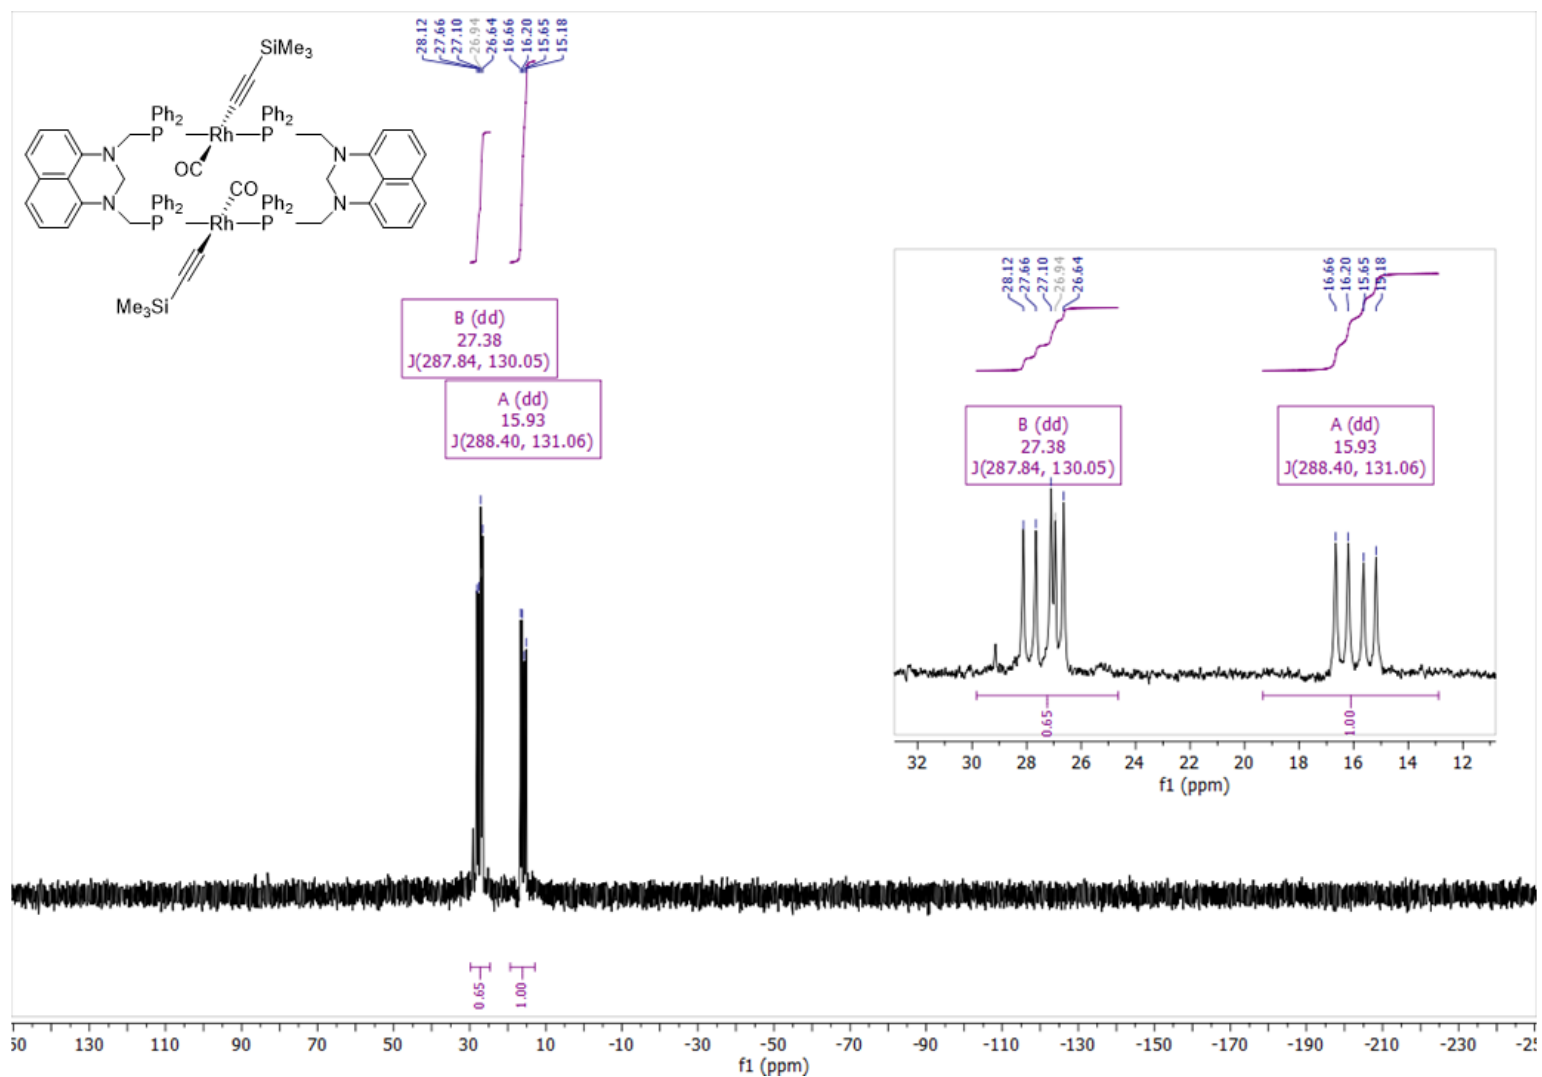

$^{31}\text{P}\{^1\text{H}\}$  NMR (283 MHz,  $\text{CD}_2\text{Cl}_2$ , 213 K) for  $[\text{Rh}(\text{CO})(\text{C}\equiv\text{SiMe}_3)(\mu\text{-PhH}_2\text{Pm})_2]$  (6).

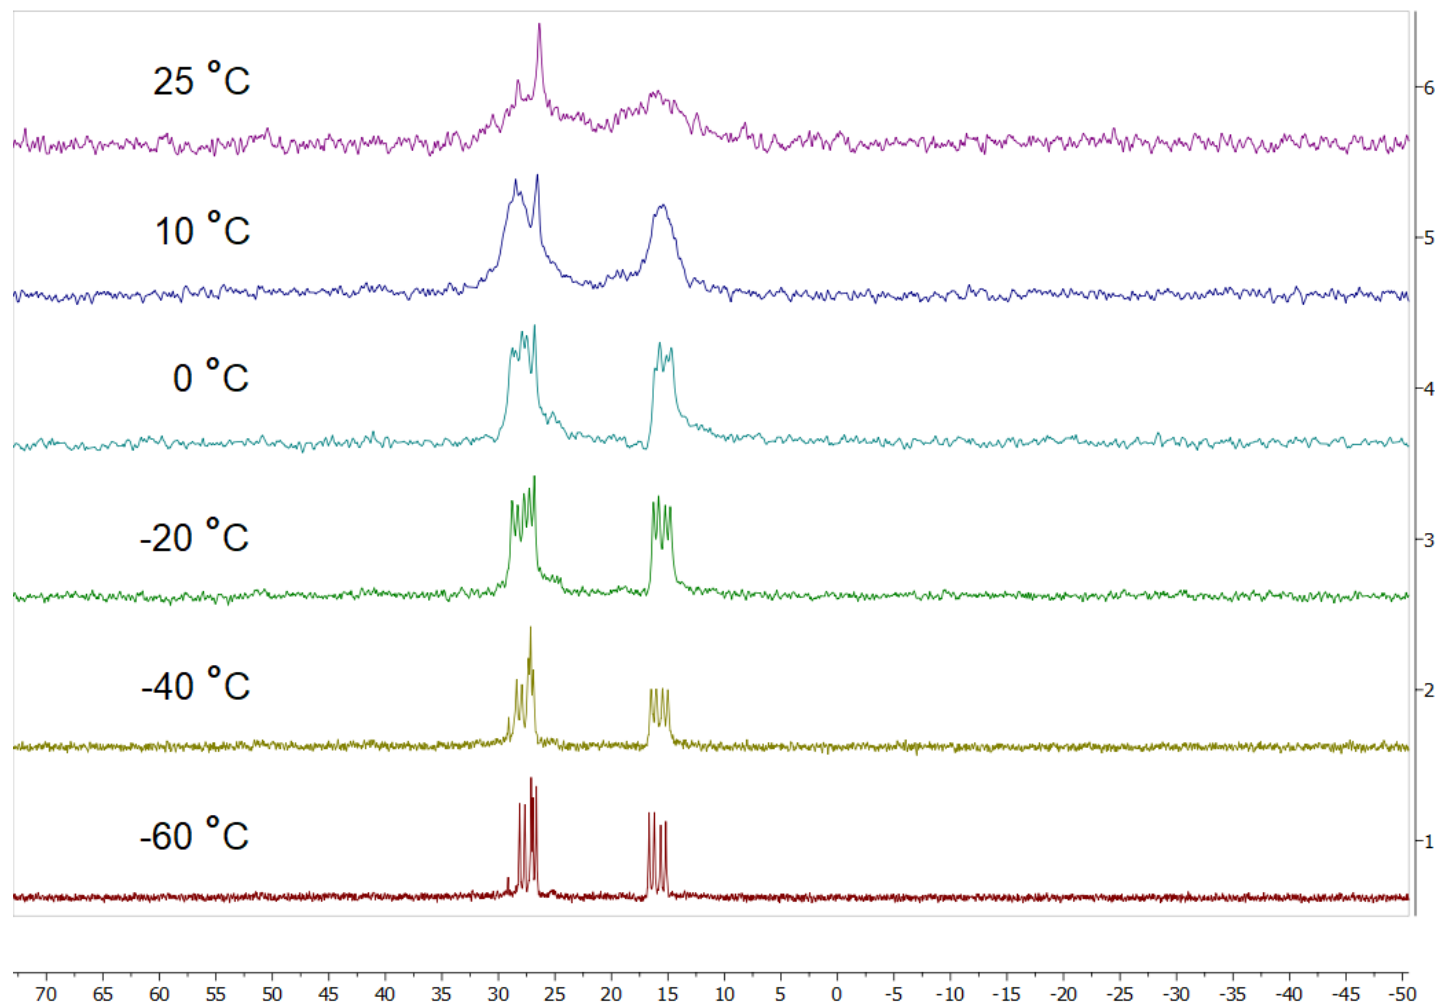

Variable temperature  $^{31}\text{P}\{^1\text{H}\}$  NMR (700 MHz,  $\text{CD}_2\text{Cl}_2$ ) for  $[\text{Rh}(\text{CO})(\text{C}\equiv\text{CSiMe}_3)(\mu\text{-PhH}_2\text{Pm})_2]$  (**6**).

**Multiple Mass Analysis: 2 mass(es) processed**

Tolerance = 4.0 PPM / DBE: min = -1.5, max = 60.0

Element prediction: Off

Number of isotope peaks used for i-FIT = 3

Monoisotopic Mass, Even Electron Ions

717 formula(e) evaluated with 1 results within limits (up to 38 best isotopic matches for each mass)

Elements Used:

C: 0-90 H: 0-90 N: 0-4 O: 2-2 23Na: 0-1 Si: 0-2 P: 0-4 103Rh: 0-2

LJW-(RhCCTMS)2/AJ

SYNAPTG2-Si#NotSet

01-Oct-2021

66835

12:07:34

1078 85 (0.183) Cm (81:133)

1: TOF MS ES+

6.96e+006

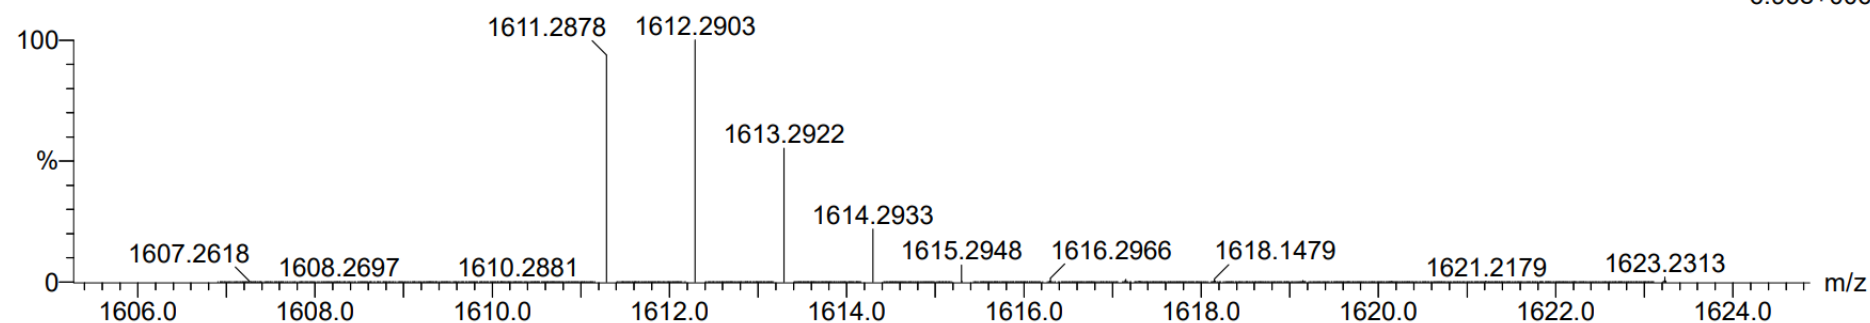

Minimum: 80.00  
 Maximum: 100.00

| Mass      | RA    | Calc. Mass | mDa  | PPM  | DBE  | i-FIT  | Norm | Conf (%) | Formula                          |
|-----------|-------|------------|------|------|------|--------|------|----------|----------------------------------|
| 1611.2878 | 93.62 | 1611.2935  | -5.7 | -3.5 | 51.5 | 2605.2 | n/a  | n/a      | C86 H82 N4 O2 23Na Si2 P4 103Rh2 |

MS (ESI, +ve ion) for [Rh(CO)(C≡CSiMe<sub>3</sub>)(μ-PhH<sub>2</sub>Pm)]<sub>2</sub> (**6**).



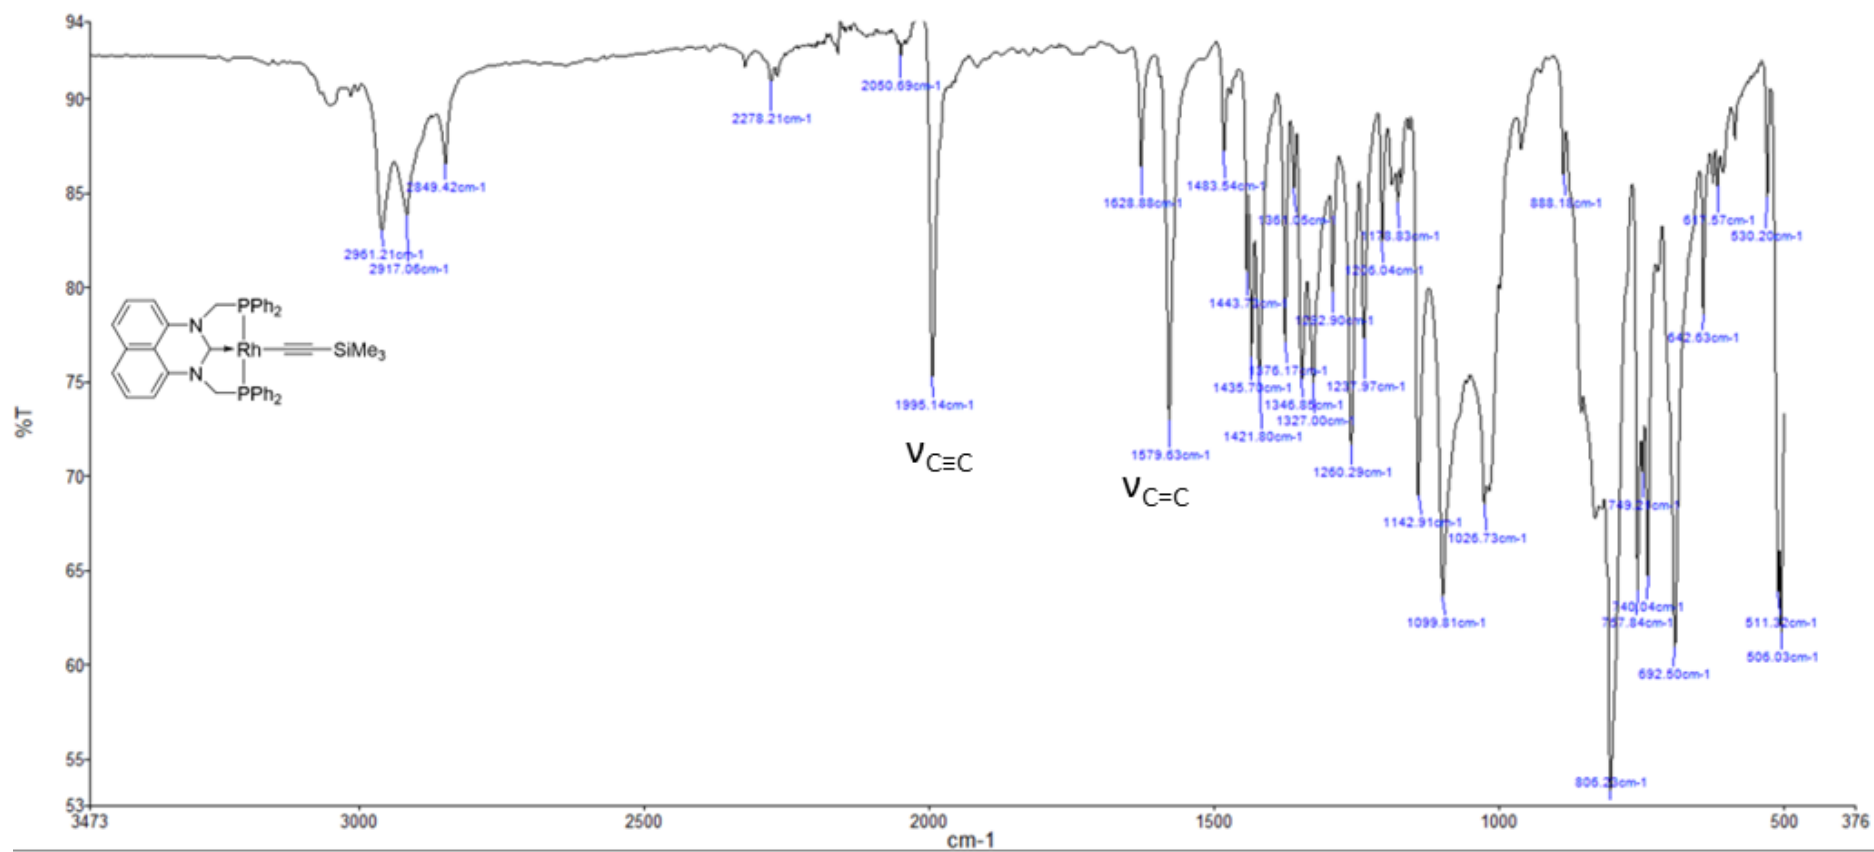

IR (ATR,  $\text{cm}^{-1}$ ) for  $[\text{Rh}(\text{C}\equiv\text{CSiMe}_3)(\text{PhPm})]$  (7).

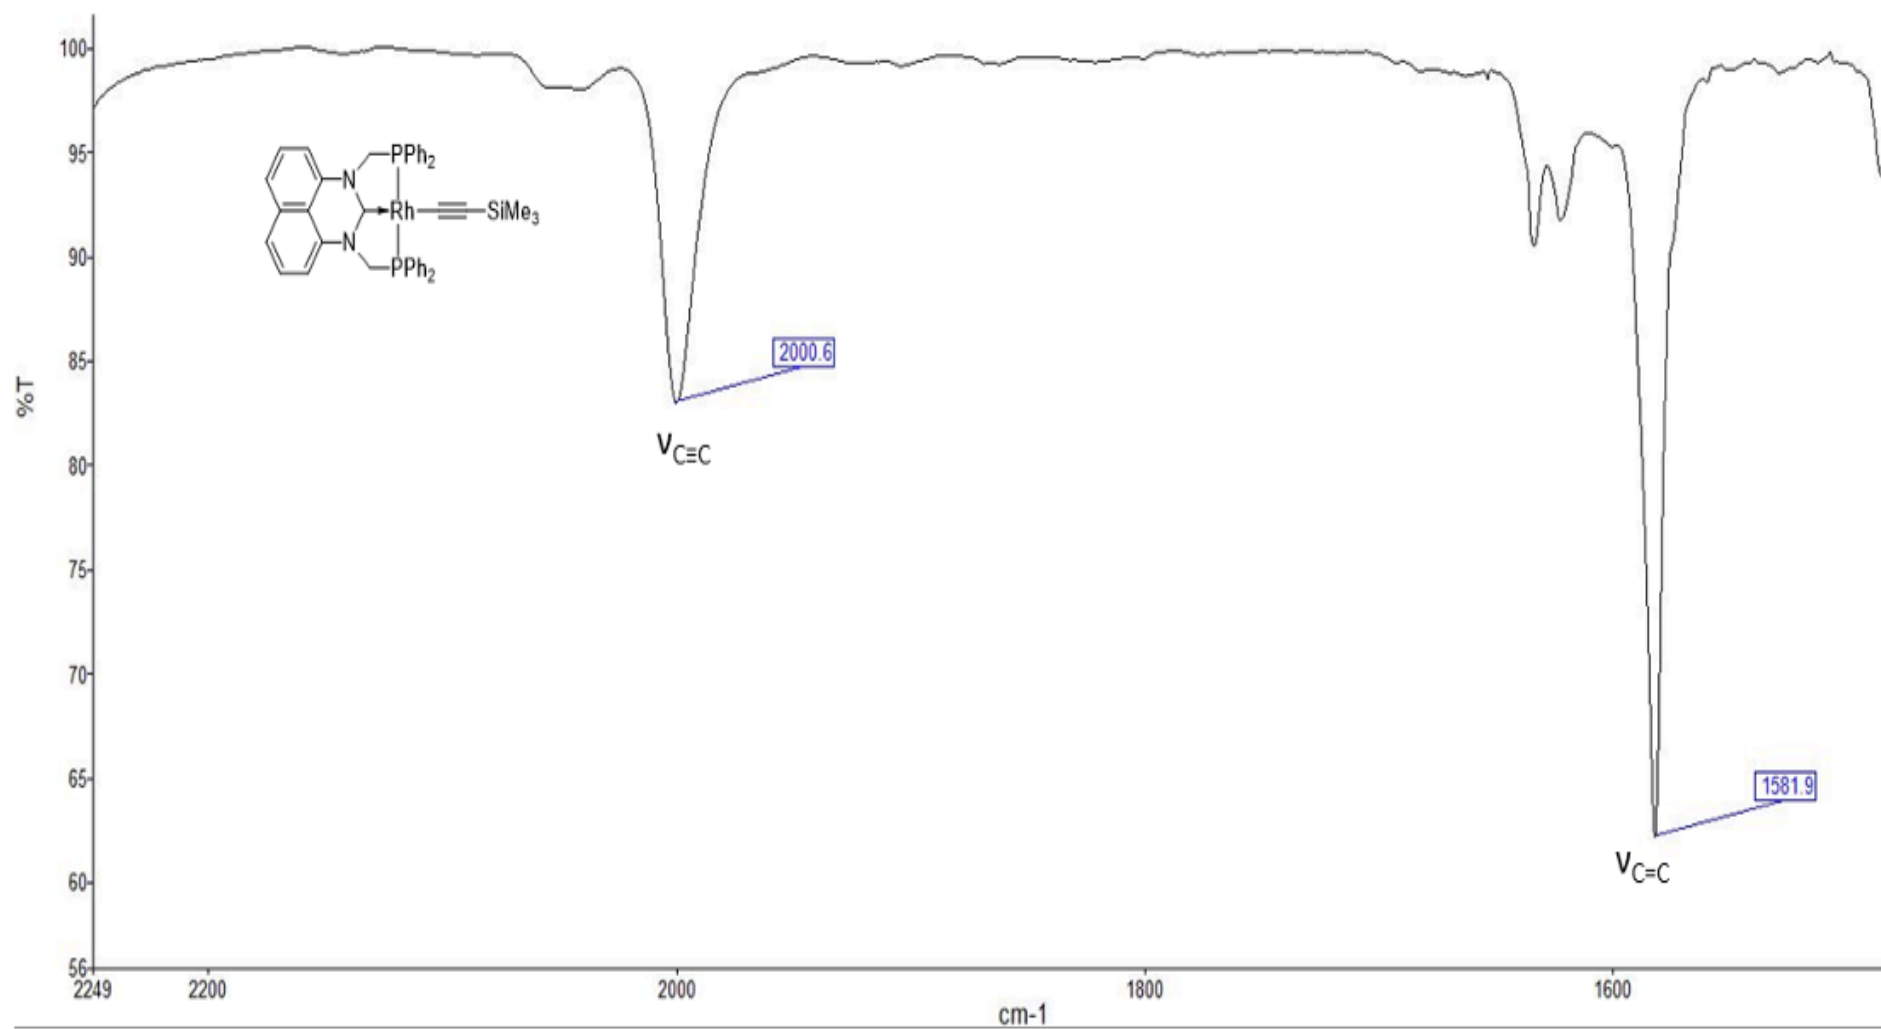

IR ( $\text{CH}_2\text{Cl}_2$ ,  $\text{cm}^{-1}$ ) for  $[\text{Rh}(\text{C}\equiv\text{CSiMe}_3)(\text{PhPm})]$  (7).

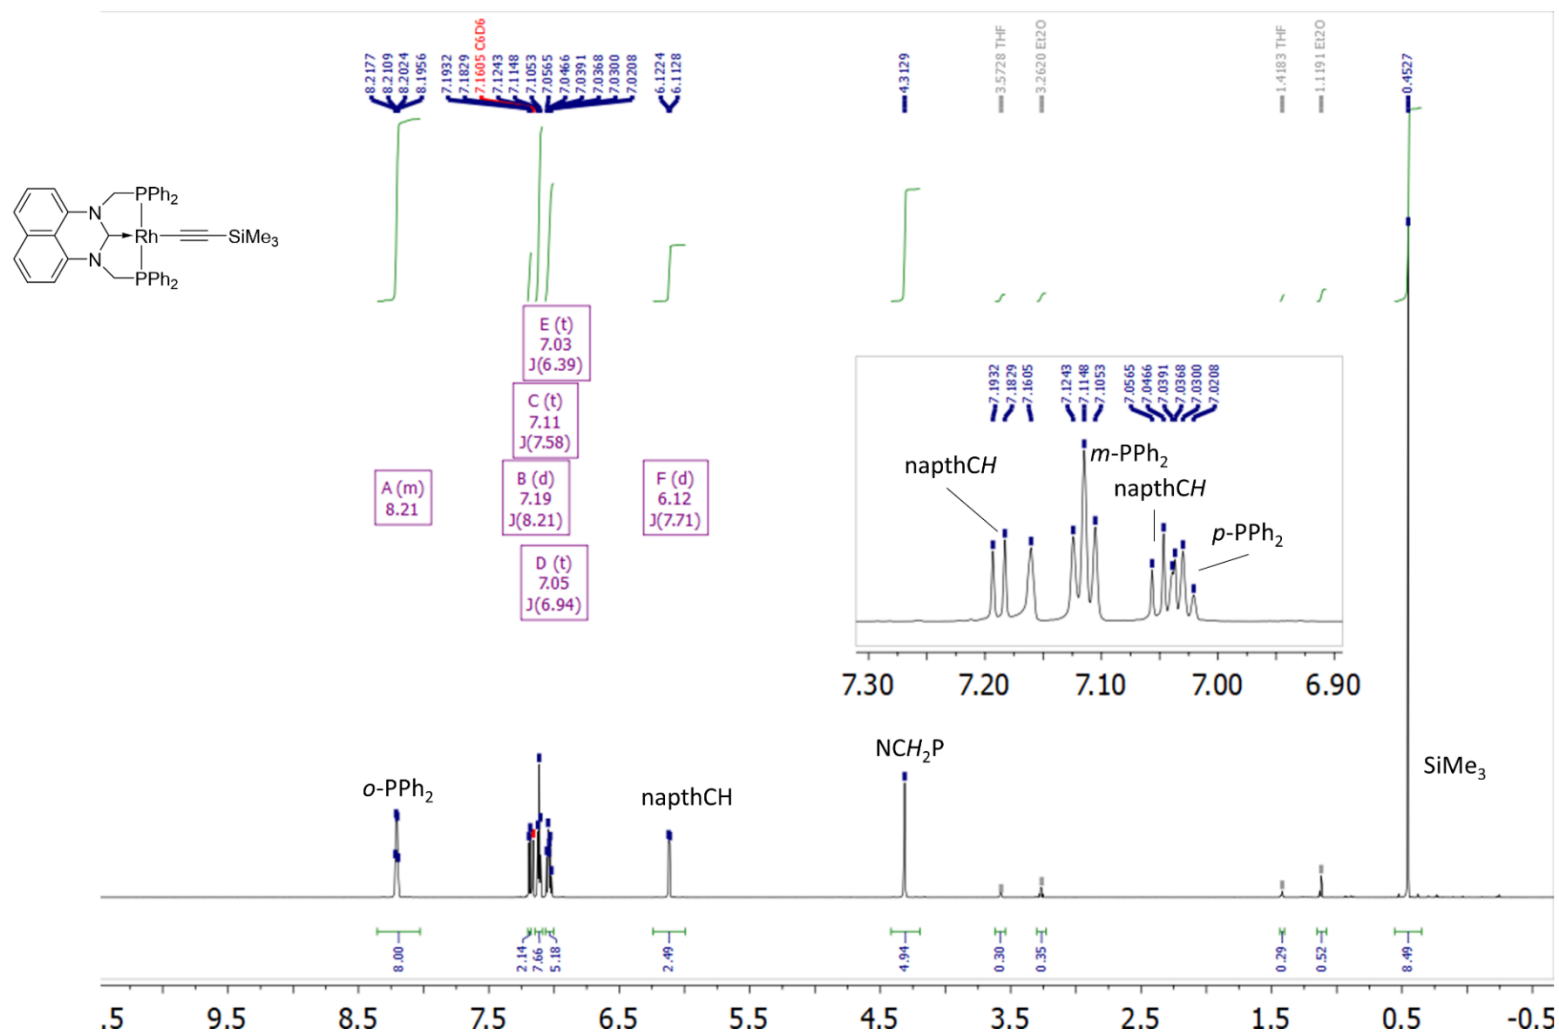

<sup>1</sup>H NMR (800 MHz, C<sub>6</sub>D<sub>6</sub>, 298K) for [Rh(C≡CSiMe<sub>3</sub>)(Phm)] (7).

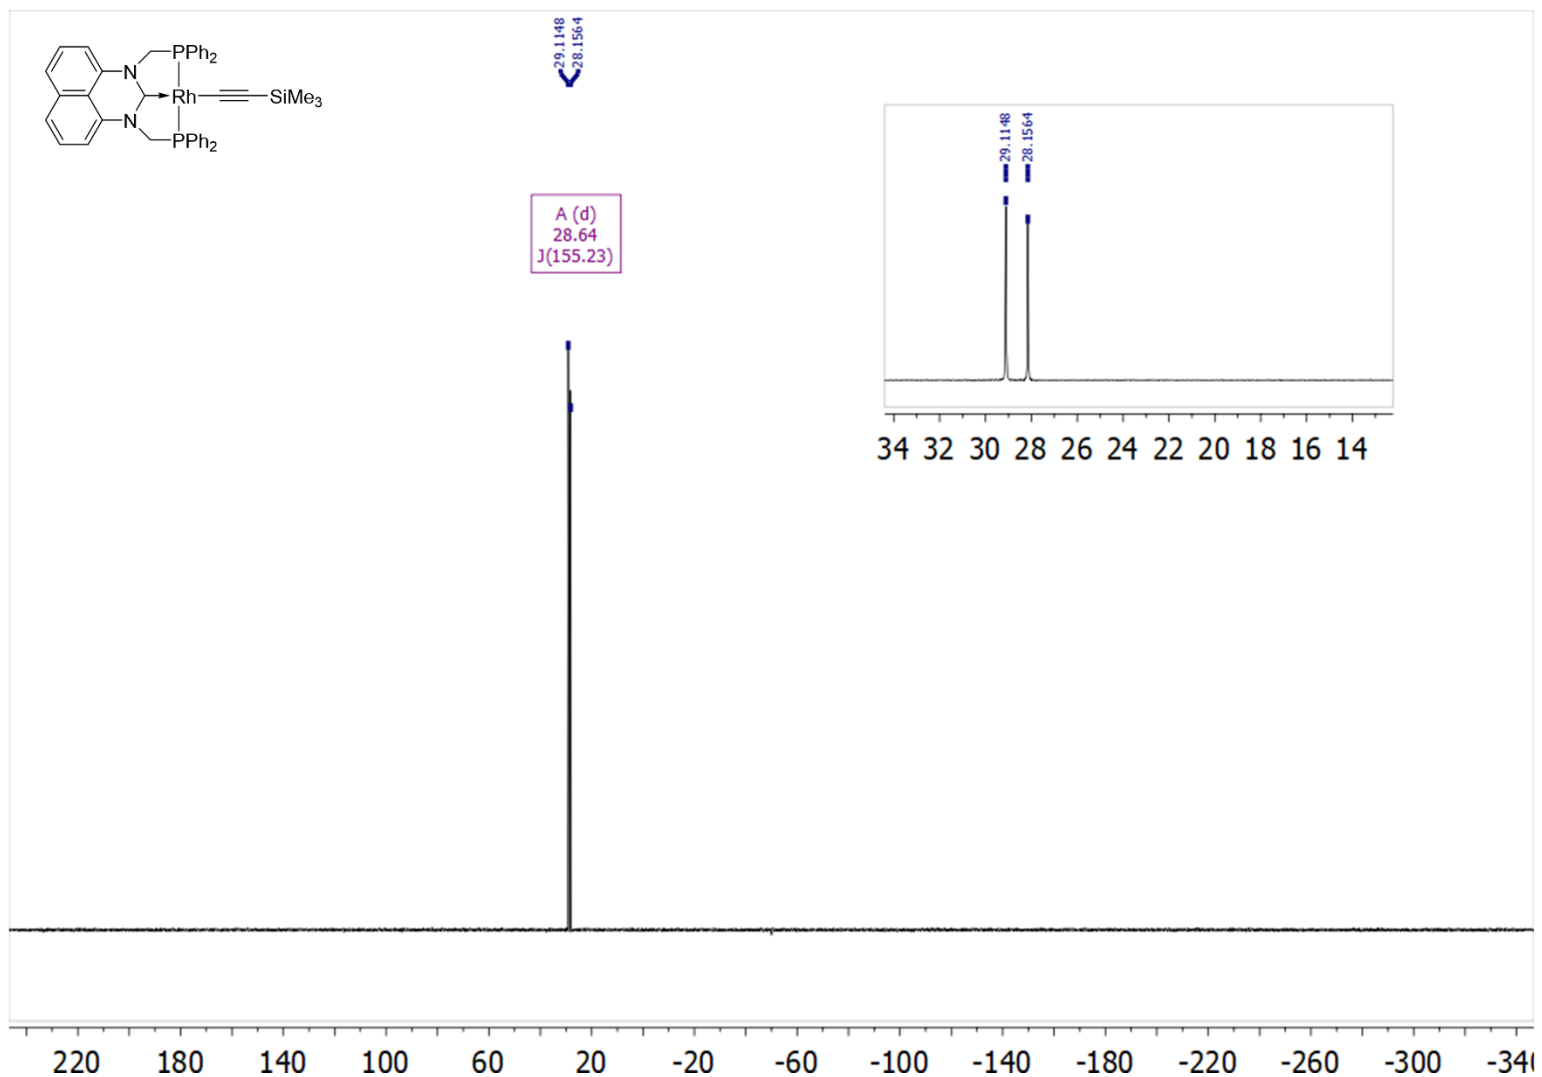

$^{31}\text{P}\{^1\text{H}\}$  NMR (162 MHz,  $\text{C}_6\text{D}_6$ , 298K) for  $[\text{Rh}(\text{C}\equiv\text{CSiMe}_3)(\text{PhPm})]$  (7).

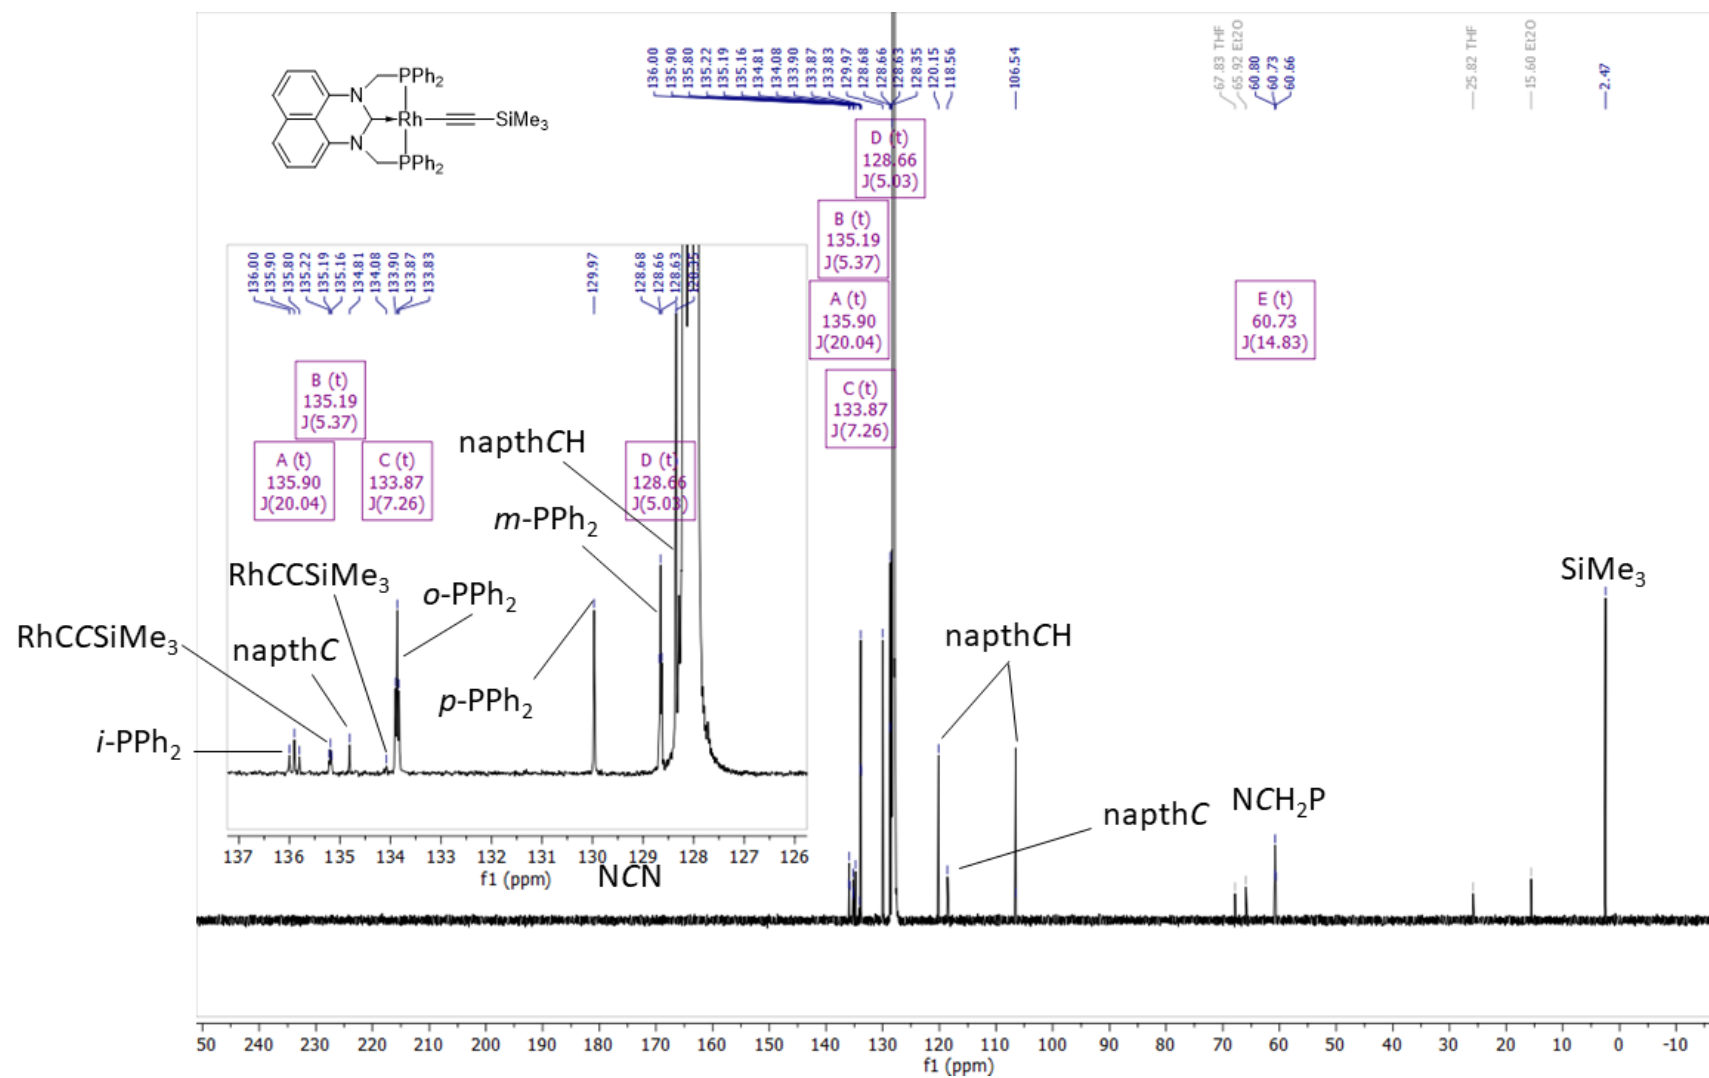

$^{13}\text{C}\{^1\text{H}\}$  NMR (201 MHz,  $\text{C}_6\text{D}_6$ , 298K) for  $[\text{Rh}(\text{C}\equiv\text{SiMe}_3)(\text{PhPm})]$  (7).

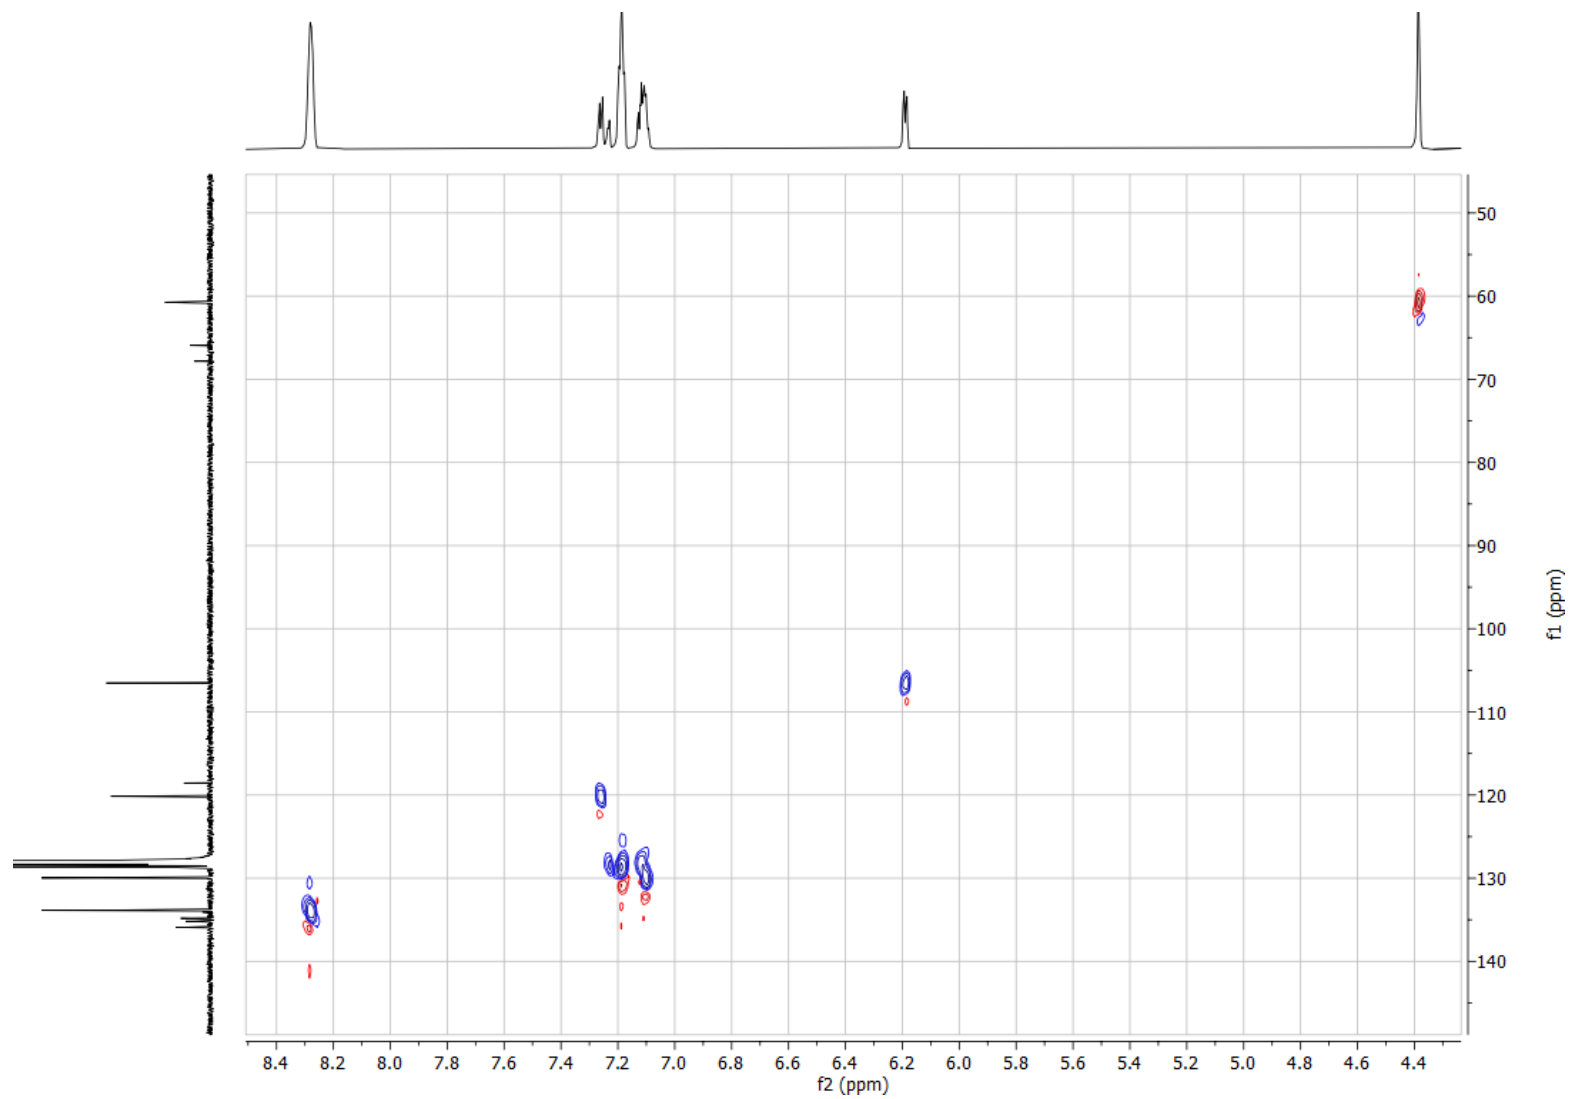

HSQC NMR ( $C_6D_6$ , 298K) for  $[Rh(C\equiv CSiMe_3)(PhPm)]$  (7).

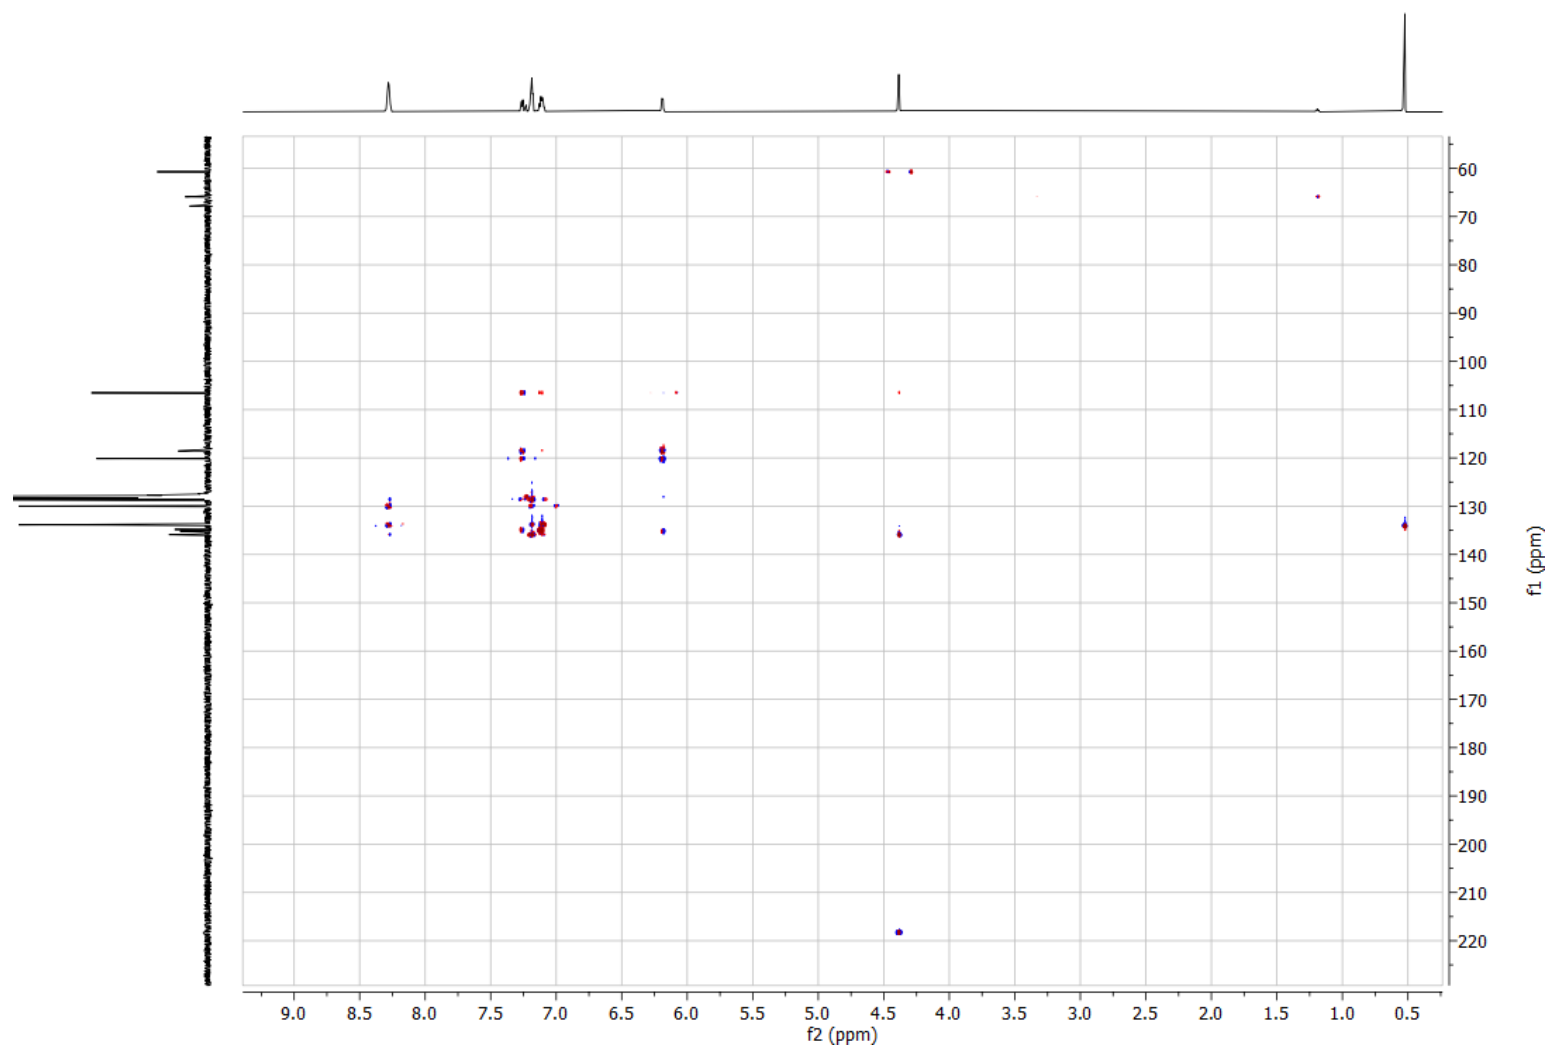

HMBC NMR (C<sub>6</sub>D<sub>6</sub>, 298K) for [Rh(C≡CSiMe<sub>3</sub>)(PhPm)] (7).

## ELECTRONIC SUPPORTING INFORMATION

## Dalton Transactions

## Single Mass Analysis

Tolerance = 3.0 PPM / DBE: min = -1.5, max = 30.0

Element prediction: Off

Number of isotope peaks used for i-FIT = 3

Monoisotopic Mass, Odd and Even Electron Ions

69 formula(e) evaluated with 1 results within limits (up to 50 best isotopic matches for each mass)

Elements Used:

C: 0-50 H: 0-50 N: 0-2 Si: 0-1 P: 0-2 103Rh: 0-1

LJW-361/AJ

SYNAPTG2-Si#NotSet

19-Mar-2021

66498

14:31:32

0278 64 (0.143) Cm (64:85)

1: TOF MS ES+

6.89e+005

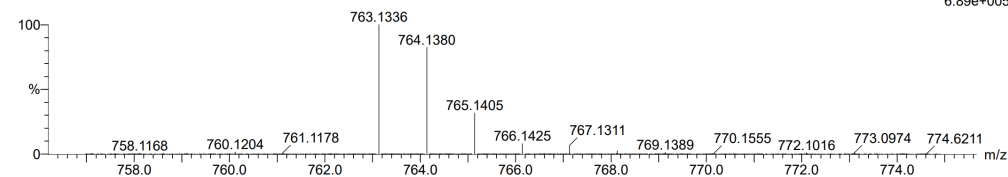

Minimum: -1.5  
Maximum: 5.0 3.0 30.0

| Mass     | Calc. Mass | mDa | PPM | DBE  | i-FIT  | Norm | Conf (%) | Formula                |
|----------|------------|-----|-----|------|--------|------|----------|------------------------|
| 763.1336 | 763.1335   | 0.1 | 0.1 | 27.0 | 1856.2 | n/a  | n/a      | C42 H38 N2 Si P2 103Rh |

## Single Mass Analysis

Tolerance = 3.0 PPM / DBE: min = -1.5, max = 30.0

Element prediction: Off

Number of isotope peaks used for i-FIT = 3

Monoisotopic Mass, Odd and Even Electron Ions

390 formula(e) evaluated with 1 results within limits (up to 50 best isotopic matches for each mass)

Elements Used:

C: 0-50 H: 0-50 N: 0-2 O: 0-4 Si: 0-1 P: 0-2 103Rh: 0-1

LJW-361/AJ

SYNAPTG2-Si#NotSet

19-Mar-2021

66498

14:31:32

0278 64 (0.143) Cm (64:85)

1: TOF MS ES+

1.22e+006

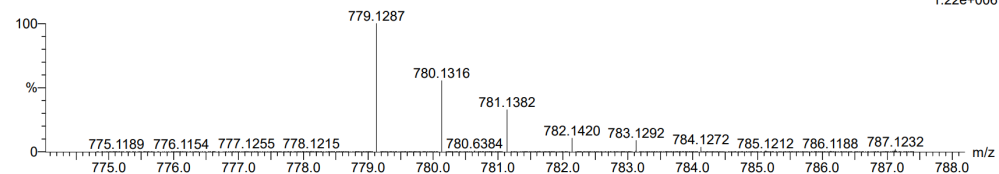

Minimum: -1.5  
Maximum: 5.0 3.0 30.0

| Mass     | Calc. Mass | mDa | PPM | DBE  | i-FIT  | Norm | Conf (%) | Formula                  |
|----------|------------|-----|-----|------|--------|------|----------|--------------------------|
| 779.1287 | 779.1284   | 0.3 | 0.4 | 27.0 | 1891.0 | n/a  | n/a      | C42 H38 N2 O Si P2 103Rh |

MS (ESI, +ve ion) for [Rh(C≡CSiMe<sub>3</sub>)(PhPm)] (7).



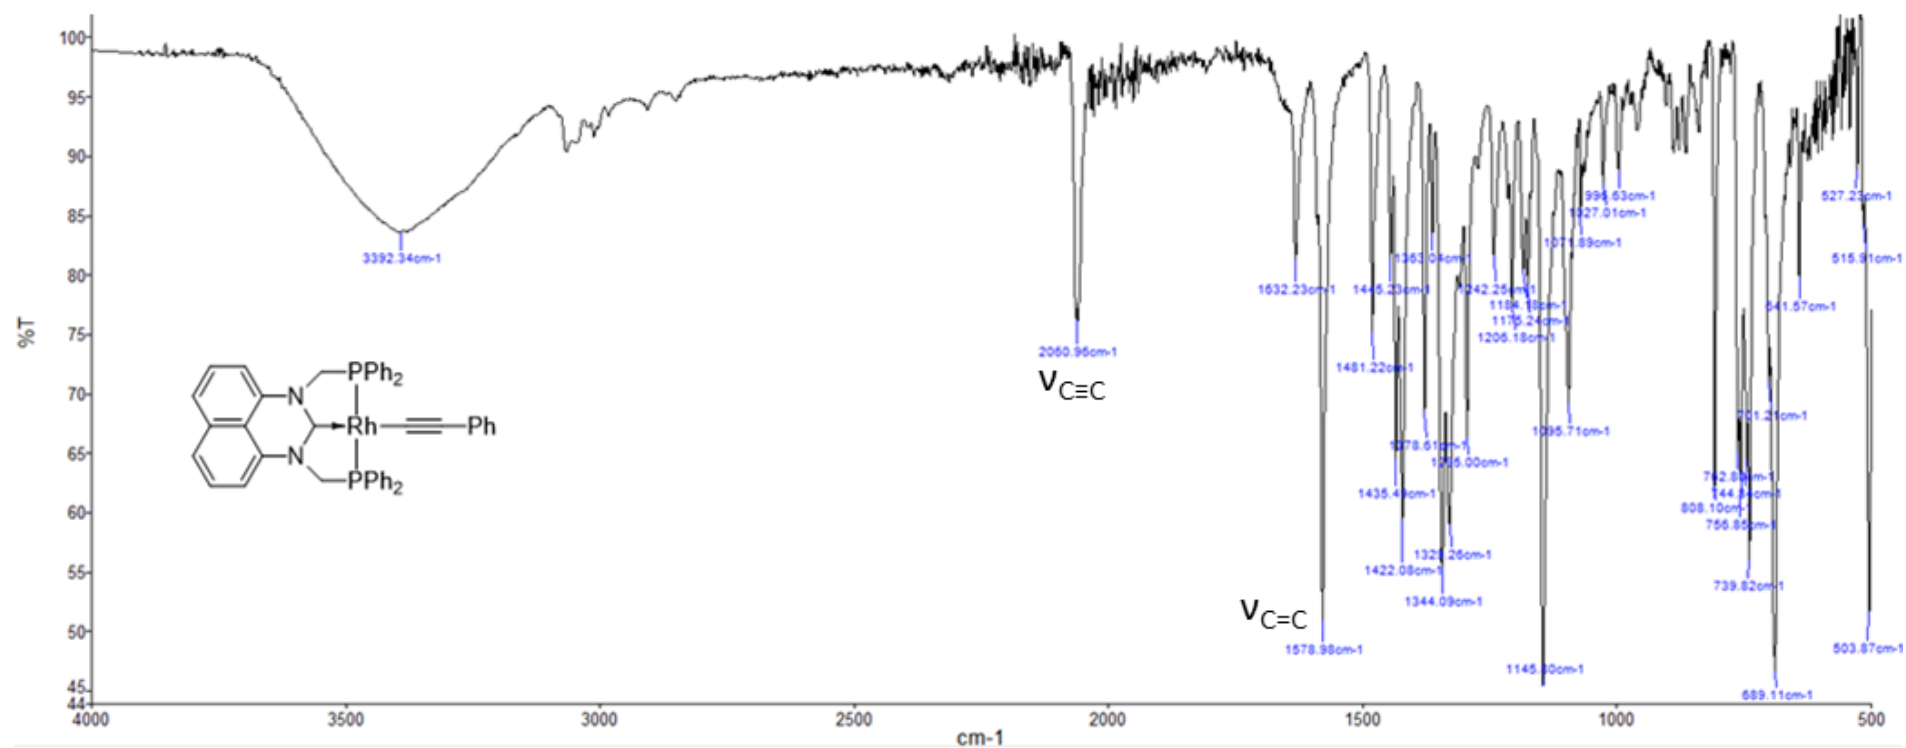IR (ATR, cm<sup>-1</sup>) for [Rh(C≡CPh)(PhPm)] (**8**).

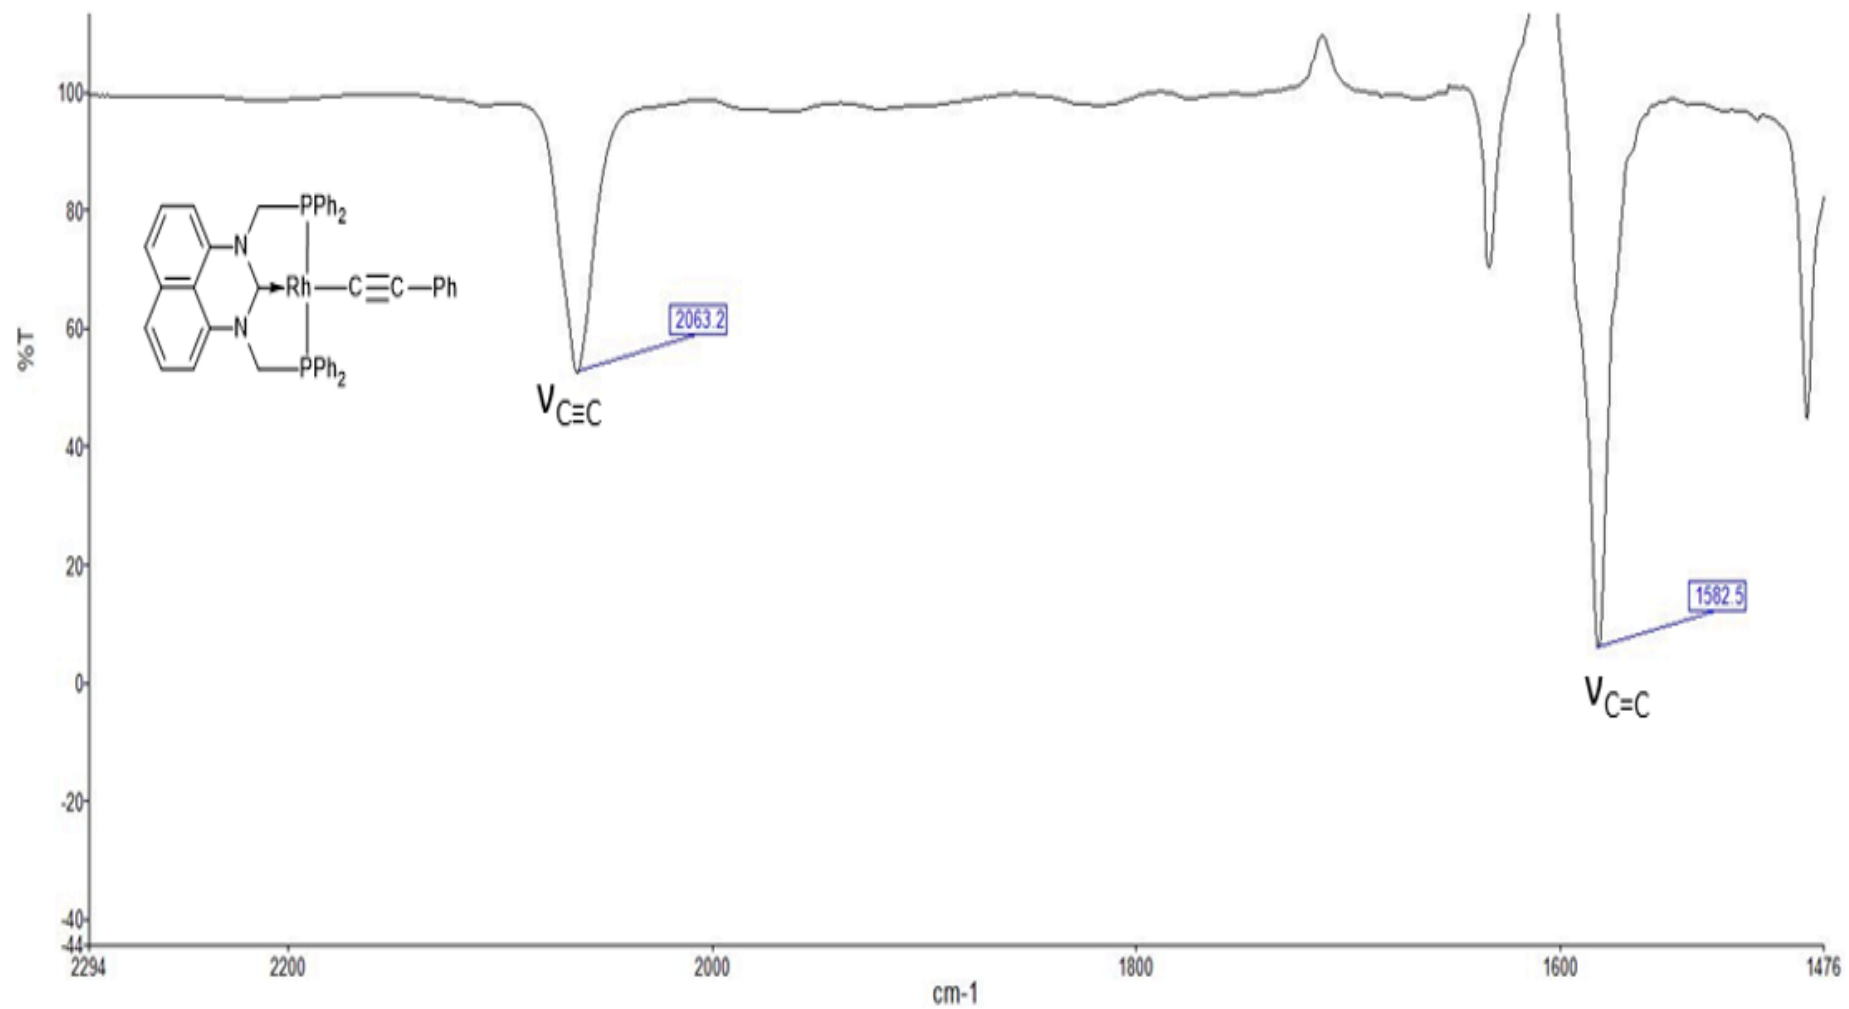

IR ( $\text{CH}_2\text{Cl}_2$ ,  $\text{cm}^{-1}$ ) for  $[\text{Rh}(\text{C}\equiv\text{CPh})(\text{PhPm})]$  (**8**).

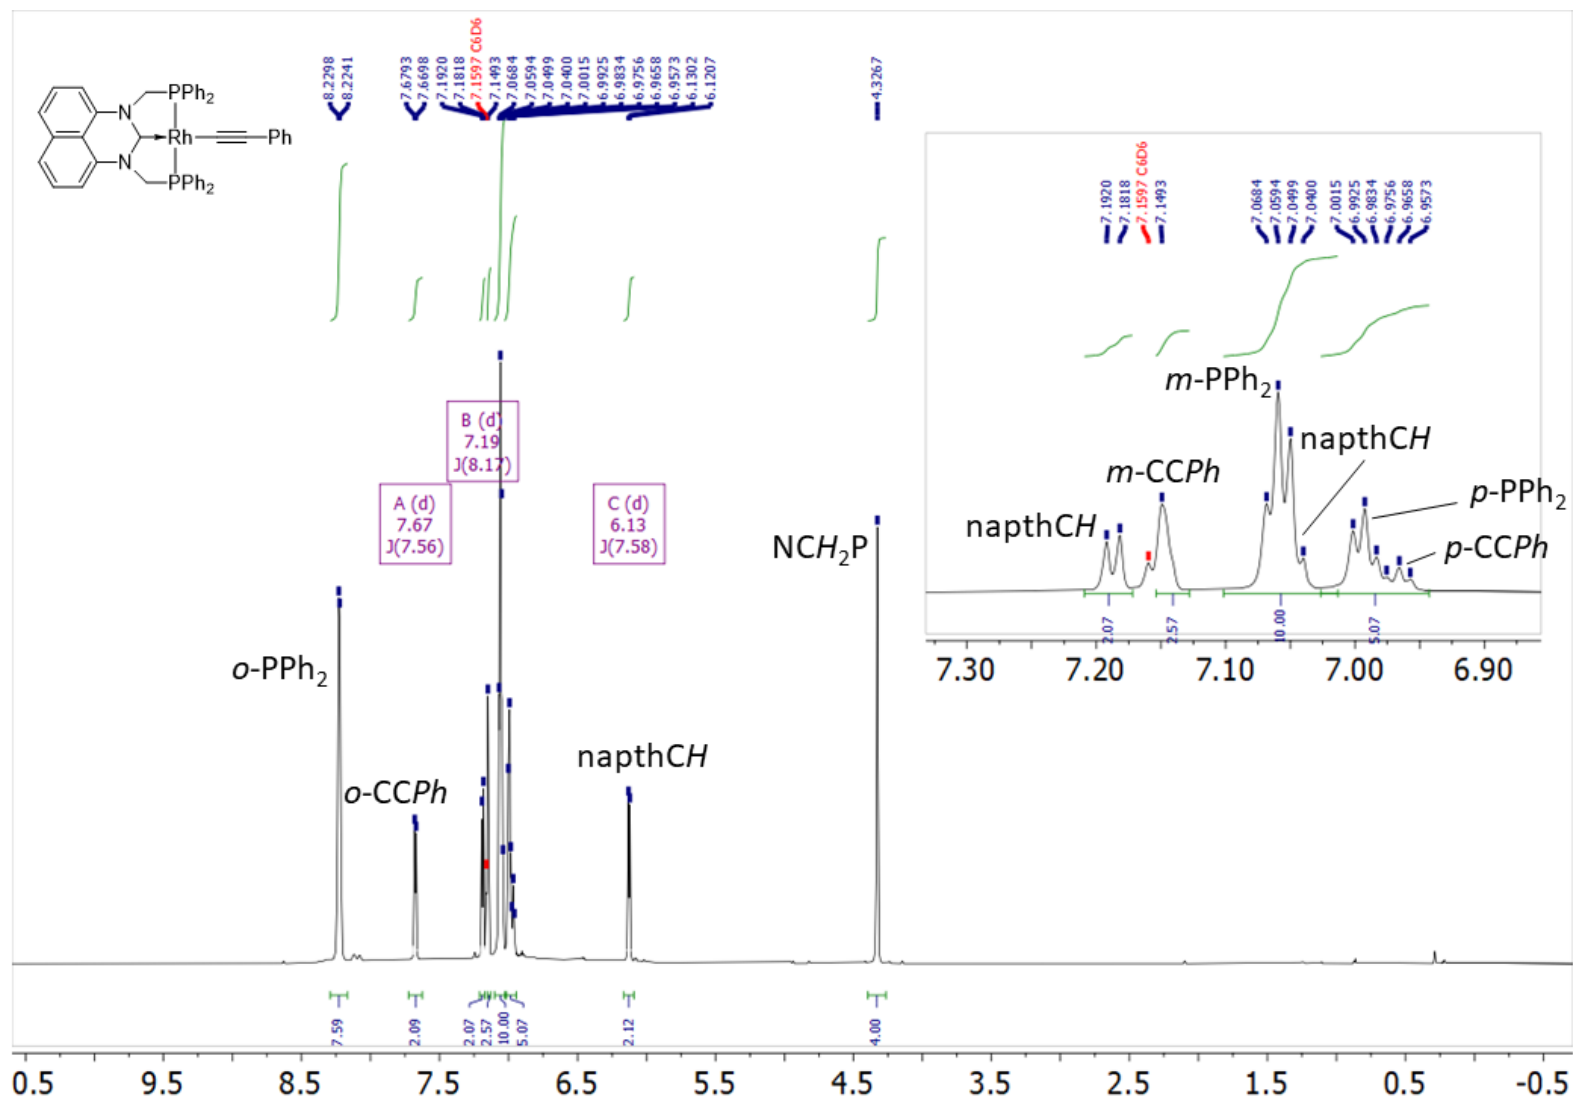

$^1\text{H}$  NMR (800 MHz,  $\text{C}_6\text{D}_6$ , 298K) for  $[\text{Rh}(\text{C}\equiv\text{CPh})(\text{PhPm})]$  (7).

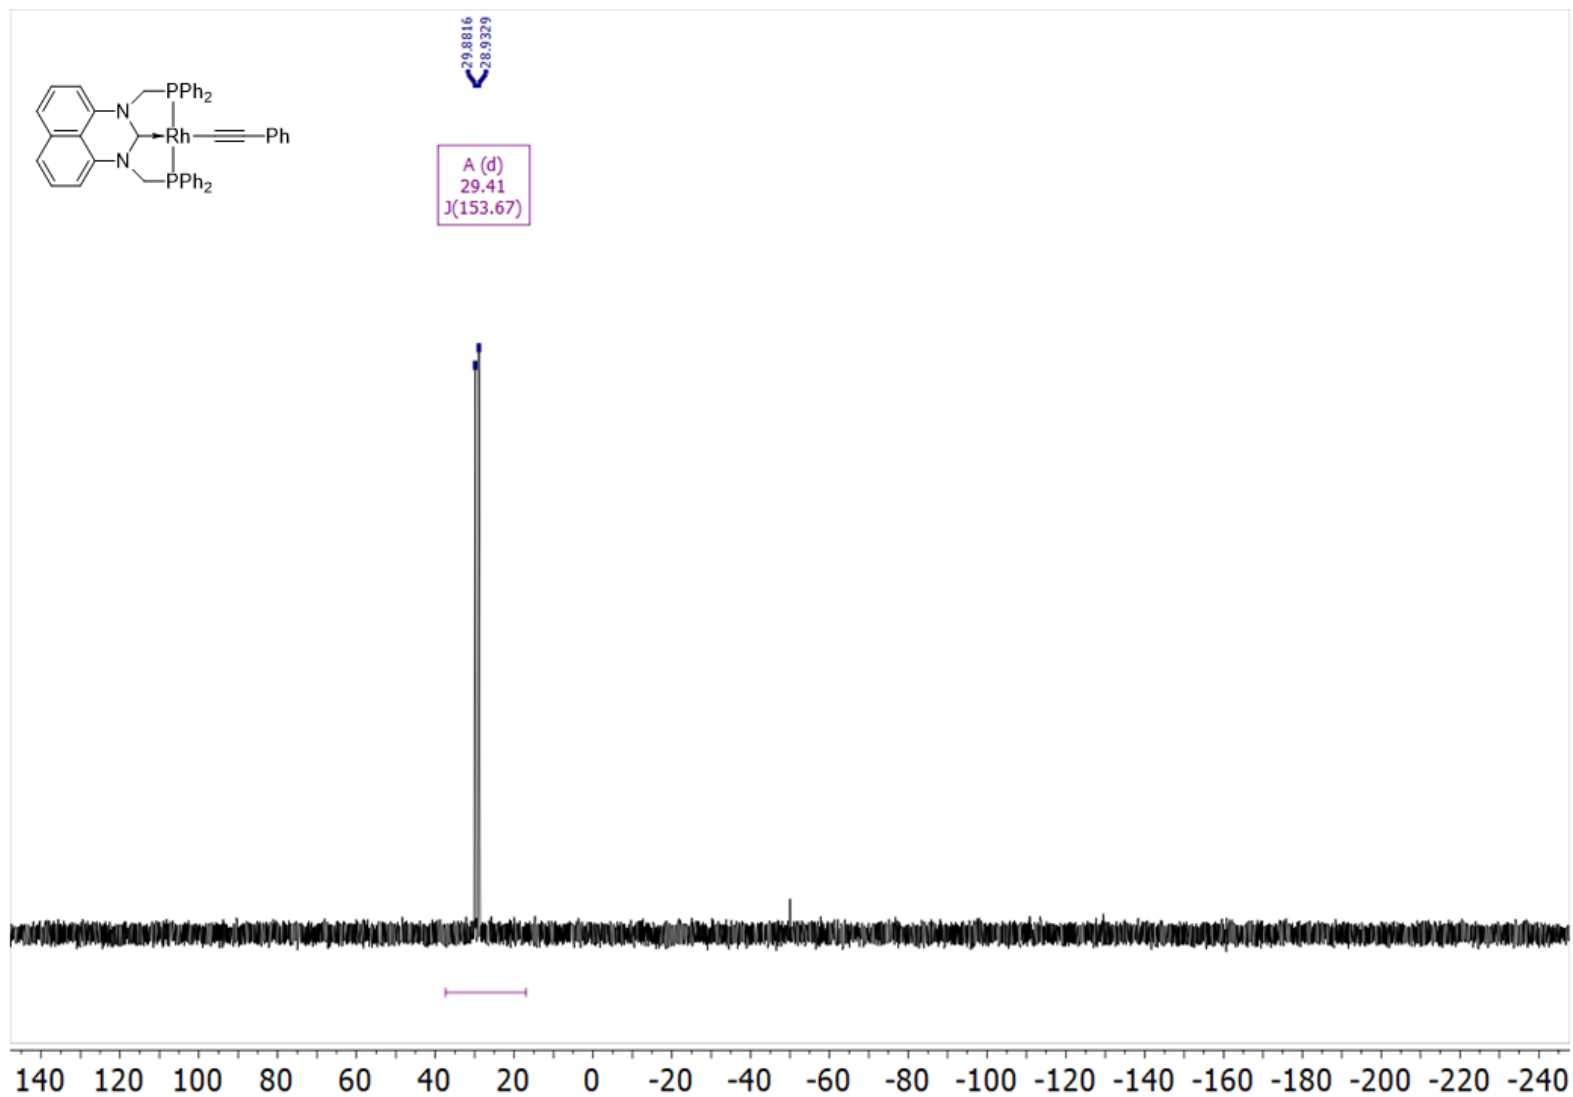

$^{31}\text{P}\{^1\text{H}\}$  NMR (162 MHz,  $\text{C}_6\text{D}_6$ , 298K) for  $[\text{Rh}(\text{C}\equiv\text{CPh})(\text{PhPm})]$  (8).

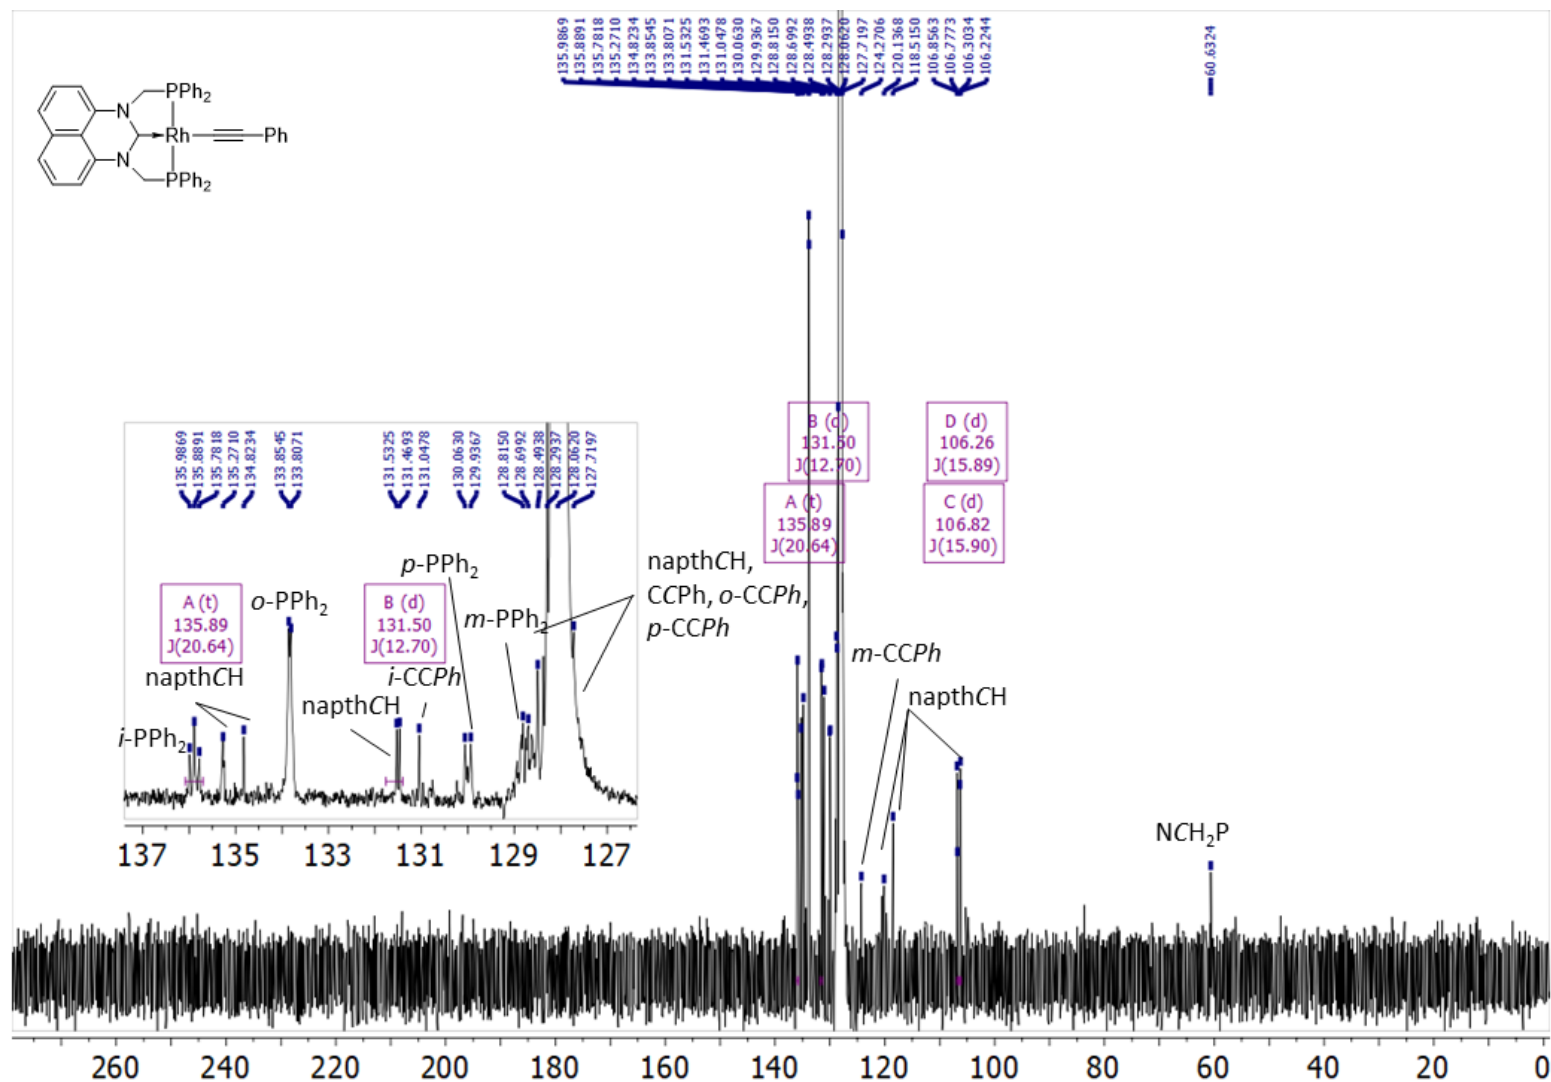

$^{13}\text{C}\{^1\text{H}\}$  NMR (201 MHz,  $\text{C}_6\text{D}_6$ , 298K) for  $[\text{Rh}(\text{C}\equiv\text{CPh})(\text{PhPm})]$  (**8**).

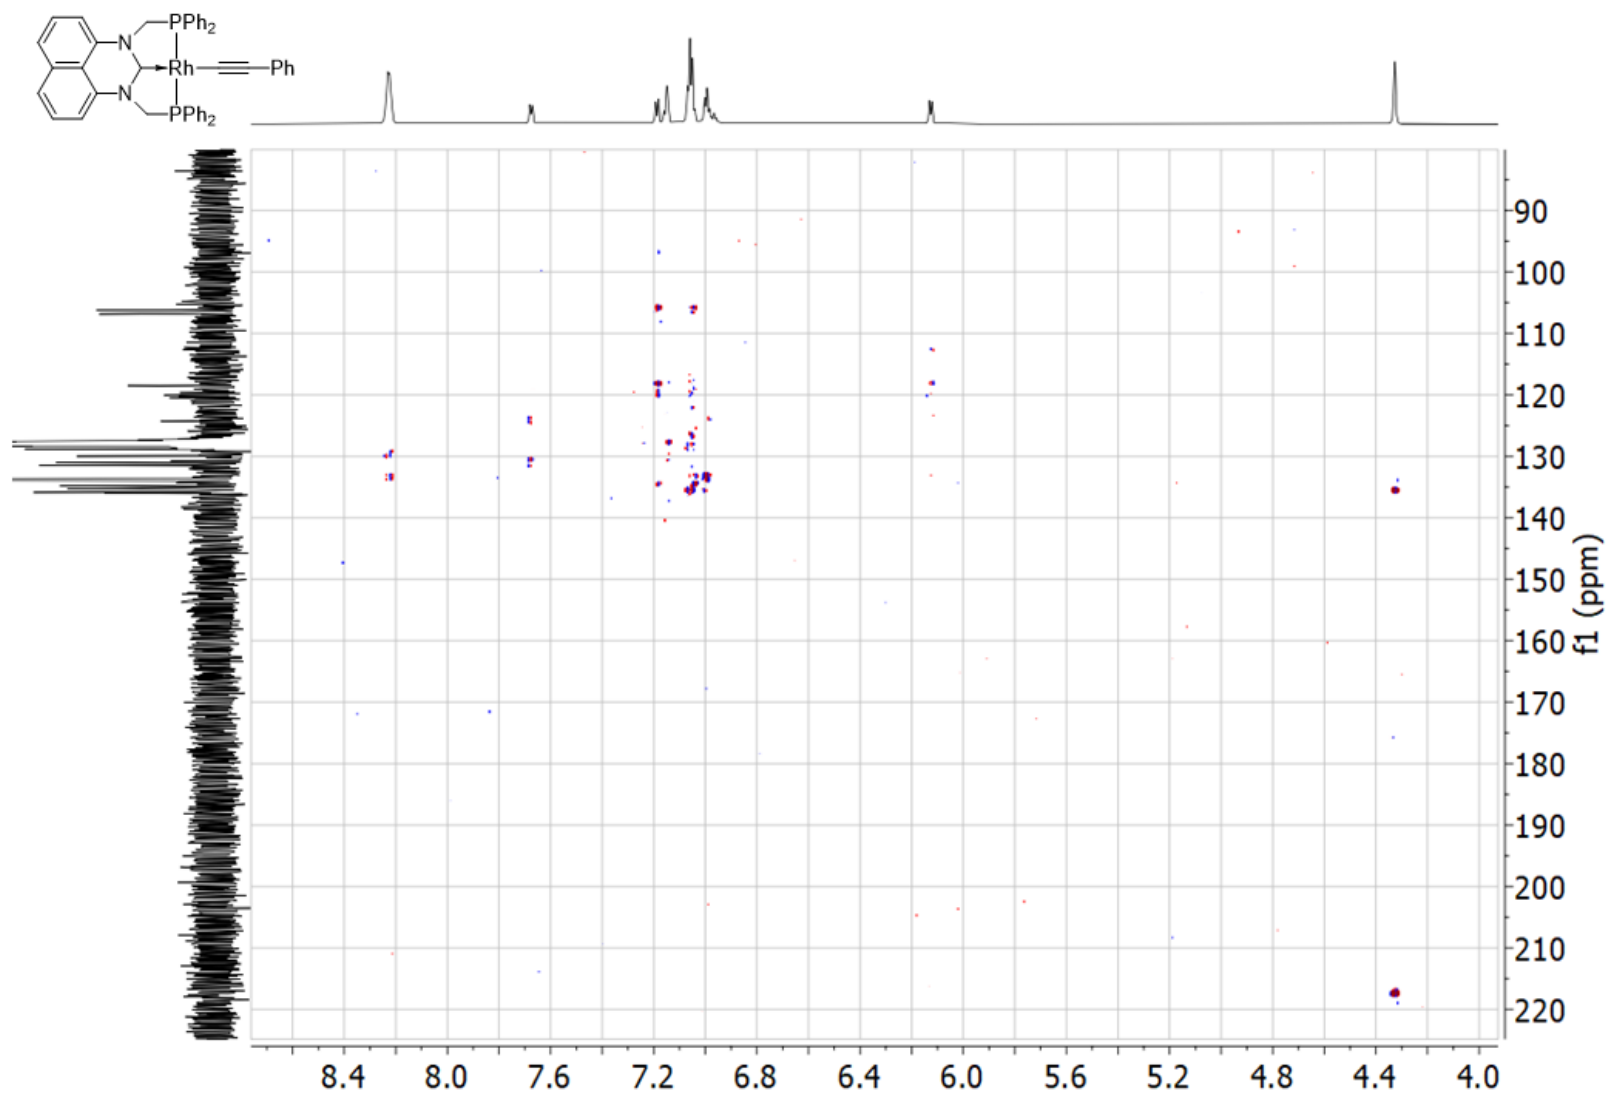

$^1\text{H}$ - $^{13}\text{C}$  HMBC ( $\text{C}_6\text{D}_6$ , 298K) for  $[\text{Rh}(\text{C}\equiv\text{CPh})(\text{PhPm})]$  (**8**).

**Single Mass Analysis**

Tolerance = 3.0 PPM / DBE: min = -1.5, max = 34.0

Element prediction: Off

Number of isotope peaks used for i-FIT = 3

Monoisotopic Mass, Odd and Even Electron Ions

40 formula(e) evaluated with 1 results within limits (up to 50 best isotopic matches for each mass)

Elements Used:

C: 0-50 H: 0-40 N: 0-2 23Na: 0-1 P: 0-2 103Rh: 0-1

LJW-RhCCPh-MeOH/AJ

SYNAPT G2-Si#NotSet

14-Apr-2021

66583

12:17:32

0407 52 (0.121) Cm (41:320)

1: TOF MS ES+

4.03e+006

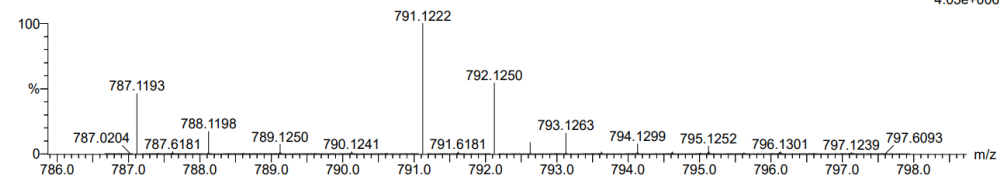

Minimum: -1.5  
 Maximum: 5.0 3.0 34.0

| Mass     | Calc. Mass | mDa  | PPM  | DBE  | i-FIT  | Norm | Conf (%) | Formula                  |
|----------|------------|------|------|------|--------|------|----------|--------------------------|
| 791.1222 | 791.1228   | -0.6 | -0.8 | 30.0 | 4276.0 | n/a  | n/a      | C45 H35 N2 23Na P2 103Rh |

**Single Mass Analysis**

Tolerance = 3.0 PPM / DBE: min = -1.5, max = 50.0

Element prediction: Off

Number of isotope peaks used for i-FIT = 3

Monoisotopic Mass, Even Electron Ions

24 formula(e) evaluated with 1 results within limits (up to 50 best isotopic matches for each mass)

Elements Used:

C: 0-50 H: 0-40 N: 0-2 P: 0-2 103Rh: 0-1

LJW-RhCCPh-MeOH/AJ

SYNAPT G2-Si#NotSet

14-Apr-2021

66583

12:17:32

0407 52 (0.121) Cm (41:320)

1: TOF MS ES+

5.49e+007

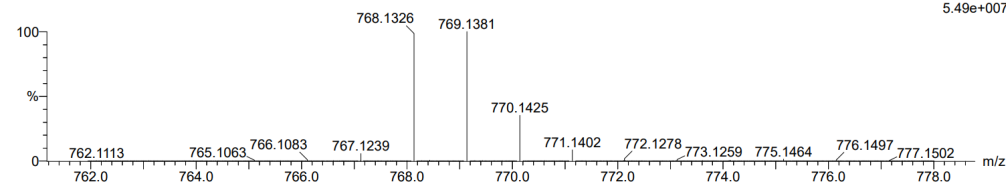

Minimum: -1.5  
 Maximum: 5.0 3.0 50.0

| Mass     | Calc. Mass | mDa  | PPM  | DBE  | i-FIT  | Norm | Conf (%) | Formula             |
|----------|------------|------|------|------|--------|------|----------|---------------------|
| 768.1326 | 768.1331   | -0.5 | -0.7 | 30.5 | 4347.0 | n/a  | n/a      | C45 H35 N2 P2 103Rh |

MS (ESI, +ve ion) for [Rh(C≡CPh)(PhPm)] (8).
